# Supplementary material for: Palladium-catalyzed enantioselective allylic alkylation of trifluoromethyl group substituted racemic and acyclic unsymmetrical 1,3-disubstituted allylic esters with malonate anions
Source: Royal Society of Chemistry journal article supplement (doi:10.1039/c6ob00449k), 2016-01-01
Supplement: c6ob00449k1.pdf [file c6ob00449k1.pdf]

## *Supporting Information*

### **Palladium-catalyzed Enantioselective Allylic Alkylation of Trifluoromethyl Group Substituted Racemic and Acyclic Unsymmetrical 1,3-Disubstituted Allylic Esters with Malonate Anions**

Kazunori Ikeda, Takashi Futamura, Taisyun Hanakawa, Maki Minakawa, and Motoi Kawatsura\*

*Department of Chemistry, College of Humanities & Sciences, Nihon University,  
Sakurajosui, Setagaya-ku, Tokyo 156-8550, Japan*

kawatsur@chs.nihon-u.ac.jp

#### **Contents of Supporting Information:**

|                                                                                                     |      |
|-----------------------------------------------------------------------------------------------------|------|
| 1) General and Materials                                                                            | S-2  |
| 2) Characterization of trifluoromethylated allyl esters                                             | S-2  |
| 3) General procedure for the palladium-catalyzed allylic alkylation                                 | S-6  |
| 4) Characterization of alkylated products                                                           | S-6  |
| 5) Determination of absolute configuration of ( <i>R</i> )- <b>5ab</b> and ( <i>S</i> )- <b>3ab</b> | S-16 |
| 6) X-ray crystal structure of ( <i>S</i> )- <b>S3</b>                                               | S-18 |
| 7) References                                                                                       | S-18 |
| 8) Copies of <sup>1</sup> H, <sup>13</sup> C, and <sup>19</sup> F NMR spectra                       | S-19 |
| 9) Copies of chiral HPLC chart of products                                                          | S-67 |

**General and Materials:** All manipulations were carried out under a nitrogen atmosphere. NMR spectra were recorded on a JEOL JNM-ECP500 spectrometer (500 MHz for  $^1\text{H}$ , 125 MHz for  $^{13}\text{C}$  and 470 MHz for  $^{19}\text{F}$ ) or JEOL EX-270 (270 MHz for  $^1\text{H}$ , 67.8 MHz for  $^{13}\text{C}$ ). Chemical shifts are reported in  $\delta$  ppm referenced to an internal  $\text{SiMe}_4$  standard for  $^1\text{H}$  NMR, and internal  $\text{C}_6\text{F}_6$  standard for  $^{19}\text{F}$  NMR. Residual chloroform ( $\delta$  77.0 for  $^{13}\text{C}$ ) was used as internal reference for  $^{13}\text{C}$  NMR.  $^1\text{H}$ ,  $^{13}\text{C}$  and  $^{19}\text{F}$  NMR spectra were recorded in  $\text{CDCl}_3$  at room temperature unless otherwise noted. The NMR yields were determined by  $^1\text{H}$  or  $^{19}\text{F}$  NMR using an internal standard (phenanthrene, trioxane or  $\text{CF}_3\text{C}_6\text{H}_5$ ).  $[\text{Pd}(\pi\text{-allyl})(\text{cod})]\text{BF}_4$ <sup>1</sup> was prepared according to the literatures. Allyl carbonate **1a** was prepared by reaction of corresponding alcohol<sup>2</sup> with methyl chlorocarbonate. Allyl benzoates **1a'-g'** were prepared by reaction of corresponding alcohols<sup>2</sup> with benzoyl chloride. Chiral substrates (*S*)-**1a'** and (*R*)-**1a'** were prepared by reaction of corresponding chiral alcohols<sup>3</sup> with benzoyl chloride. Allyl benzoate **6** was prepared by reaction of corresponding alcohol, which was prepared by the Luche reduction<sup>4</sup> of corresponding enone,<sup>5</sup> with benzoyl chloride. All other chemicals, including chiral-BINAP, chiral-Tol-BINAP, and solvents were purchased from common commercial sources and were used without further purification.

**Characterization of trifluoromethylated allyl substrates:**

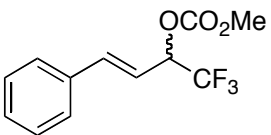 **Methyl (1,1,1-trifluoro-4-phenylbut-3-en-2-yl) carbonate (1a):** White solid. Mp. 70–72 °C.  $^1\text{H}$  NMR (500 MHz,  $\text{CDCl}_3$ )  $\delta$  3.86 (s, 3H), 5.63 (dq,  $J_{\text{HH}} = 8.0$  Hz,  $J_{\text{HF}} = 6.7$  Hz, 1H), 6.14 (dd,  $J = 16.0, 8.0$  Hz, 1H), 6.91 (d,  $J = 16.0$  Hz, 1H), 7.29–7.45 (m, 5H).  $^{13}\text{C}$  NMR (125 MHz,  $\text{CDCl}_3$ )  $\delta$  55.3, 74.9 (q,  $J_{\text{CF}} = 34.0$  Hz), 116.5, 122.9 (q,  $J_{\text{CF}} = 280.7$  Hz), 127.0, 128.6, 129.0, 134.7, 139.2, 154.2.  $^{19}\text{F}$  NMR (470 MHz,  $\text{CDCl}_3$ )  $\delta$  85.1 (d,  $J = 6.6$  Hz). IR (KBr) 3085, 3067, 3027, 3006, 2976, 1888, 1767, 1723, 1661, 1579  $\text{cm}^{-1}$ . HRMS (ESI):  $m/z$ : calcd for  $\text{C}_{12}\text{H}_{11}\text{F}_3\text{NaO}_3$ ,  $[\text{M}+\text{Na}]^+$  283.0558, found 283.0552.

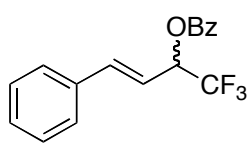

**1,1,1-Trifluoro-4-phenylbut-3-en-2-yl benzoate (1a')**: White solid. Mp. 62–64 °C. <sup>1</sup>H NMR (500 MHz, CDCl<sub>3</sub>) δ 6.08 (dq,  $J_{\text{HH}} = 7.7$  Hz,  $J_{\text{HF}} = 6.7$  Hz, 1H), 6.23 (dd,  $J = 15.8, 7.7$  Hz, 1H), 6.95 (d,  $J = 15.8$  Hz, 1H), 7.28–7.37 (m, 3H), 7.41–7.51 (m, 4H), 7.61 (tt,  $J = 7.4, 1.4$  Hz, 1H), 8.11 (dd,  $J = 8.4, 1.3$  Hz, 2H). <sup>13</sup>C NMR (125 MHz, CDCl<sub>3</sub>) δ 71.6 (q,  $J_{\text{CF}} = 33.6$  Hz), 117.2, 123.3 (q,  $J_{\text{CF}} = 280.7$  Hz), 127.0, 128.6, 128.7, 128.8, 129.0, 130.0, 133.8, 134.9, 138.9, 164.5. <sup>19</sup>F NMR (470 MHz, CDCl<sub>3</sub>) δ 85.5 (d,  $J = 6.4$  Hz). IR (KBr) 3090, 3067, 3034, 2962, 1731, 1657, 1600, 1583, 1500 cm<sup>-1</sup>. HRMS (ESI):  $m/z$ : calcd for C<sub>17</sub>H<sub>13</sub>F<sub>3</sub>NaO<sub>2</sub>, [M+Na]<sup>+</sup> 329.0765, found 329.0768.

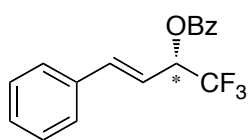

**(S)-1,1,1-Trifluoro-4-phenylbut-3-en-2-yl benzoate ((S)-1a')**:  $[\alpha]_{\text{D}}^{25} -8.25$  ( $c$  1.37, CHCl<sub>3</sub>) (99% ee). Enantiomeric purity was determined by HPLC using a Daicel CHIRALCEL OJ-H (hexane/2-propanol = 19/1, flow: 1.0 mL/min, 254 nm, 35 °C,  $t_{\text{R}}$  5.52 min (minor);  $t_{\text{R}}$  6.55 min (major)).

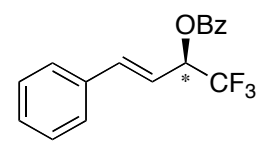

**(R)-1,1,1-Trifluoro-4-phenylbut-3-en-2-yl benzoate ((R)-1a')**:  $[\alpha]_{\text{D}}^{24} +8.00$  ( $c$  2.50, CHCl<sub>3</sub>) (99% ee). Enantiomeric purity was determined by HPLC using a Daicel CHIRALCEL OJ-H (hexane/2-propanol = 19/1, flow: 1.0 mL/min, 254 nm, 35 °C,  $t_{\text{R}}$  5.52 min (major);  $t_{\text{R}}$  6.55 min (minor)).

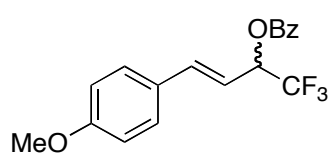

**1,1,1-Trifluoro-4-(4-methoxyphenyl)but-3-en-2-yl benzoate (1b')**: Colorless oil. <sup>1</sup>H NMR (500 MHz, CDCl<sub>3</sub>) δ 3.81 (s, 3H), 6.01–6.12 (m, 2H), 6.84–6.92 (m, 3H), 7.37 (t,  $J = 8.9$  Hz, 2H), 7.48 (t,  $J = 7.7$  Hz, 2H), 7.61 (tt,  $J = 7.7, 1.4$  Hz, 1H), 8.11 (dd,  $J = 8.9, 1.4$  Hz, 2H). <sup>13</sup>C NMR (125 MHz, CDCl<sub>3</sub>) δ 55.2, 71.8 (q,  $J_{\text{CF}} = 33.6$  Hz), 114.0, 114.7, 123.4 (q,  $J_{\text{CF}} = 280.7$  Hz), 127.7, 128.4, 128.5, 128.8, 129.9, 133.7, 138.6, 160.2, 164.5. <sup>19</sup>F NMR (470 MHz, CDCl<sub>3</sub>) δ 85.3 (d,  $J = 6.4$  Hz). IR (neat) 3036, 3008, 2961, 2938, 2913, 2839, 1735, 1654, 1607, 1579, 1514 cm<sup>-1</sup>. HRMS (ESI):  $m/z$ : calcd for C<sub>18</sub>H<sub>15</sub>F<sub>3</sub>NaO<sub>3</sub>, [M+Na]<sup>+</sup> 359.0871, found 359.0867.

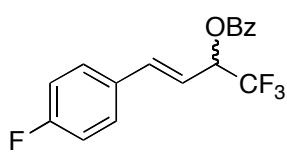

**1,1,1-Trifluoro-4-(4-fluorophenyl)but-3-en-2-yl benzoate (1c')**: White solid. Mp. 71–73 °C. <sup>1</sup>H NMR (500 MHz, CDCl<sub>3</sub>) δ 6.06 (dq, *J*<sub>HH</sub> = 6.7 Hz, *J*<sub>HF</sub> = 7.7 Hz, 1H), 6.15 (dd, *J* = 15.8, 7.7 Hz, 1H), 6.91 (d, *J* = 15.8 Hz, 1H), 7.02 (t, *J* = 8.6 Hz, 2H), 7.36–7.42 (m, 2H), 7.44–7.50 (m 2H), 7.60–7.66 (m, 1H), 8.11 (dd, *J* = 8.3, 1.1 Hz, 2H). <sup>13</sup>C NMR (125 MHz, CDCl<sub>3</sub>) δ 71.5 (q, *J*<sub>CF</sub> = 33.6 Hz), 115.6 (d, *J*<sub>CF</sub> = 21.6 Hz), 117.0, 123.4 (q, *J*<sub>CF</sub> = 280.7 Hz), 128.5, 128.7 (d, *J*<sub>CF</sub> = 8.4 Hz), 128.7, 129.9, 131.1 (q, *J*<sub>CF</sub> = 3.6 Hz), 133.7, 137.6, 163.1 (d, *J*<sub>CF</sub> = 249.5 Hz), 164.4. <sup>19</sup>F NMR (470 MHz, CDCl<sub>3</sub>) δ 49.9 (tt, *J* = 8.6, 5.3 Hz, 1F), 85.5 (d, *J* = 6.6 Hz, 3F). IR (KBr) 3075, 3064, 3042, 3014, 2958, 1736, 1693, 1660, 1600, 1512, 1454 cm<sup>-1</sup>. HRMS (ESI): *m/z*: calcd for C<sub>17</sub>H<sub>12</sub>F<sub>4</sub>NaO<sub>2</sub>, [M+Na]<sup>+</sup> 347.0671, found 347.0667.

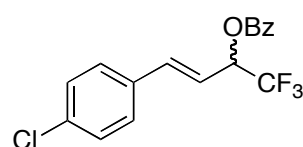

**4-(4-Chlorophenyl)-1,1,1-trifluorobut-3-en-2-yl benzoate (1d')**: White solid. Mp. 109–112 °C. <sup>1</sup>H NMR (500 MHz, CDCl<sub>3</sub>) δ 6.06 (dq, *J*<sub>HH</sub> = 7.6 Hz, *J*<sub>HF</sub> = 6.7 Hz, 1H), 6.21 (dd, *J* = 15.8, 7.6 Hz, 1H), 6.90 (d, *J* = 15.8 Hz, 1H), 7.26–7.71 (m, 7H), 8.11 (d, *J* = 7.4 Hz, 2H). <sup>13</sup>C NMR (125 MHz, CDCl<sub>3</sub>) δ 71.4 (q, *J*<sub>CF</sub> = 34.0 Hz), 117.9, 123.2 (q, *J*<sub>CF</sub> = 280.7 Hz), 128.2, 128.6, 128.6, 128.9, 130.0, 133.4, 133.9, 134.8, 137.5, 164.5. <sup>19</sup>F NMR (470 MHz, CDCl<sub>3</sub>) δ 85.6 (d, *J* = 6.2 Hz). IR (KBr) 30094, 3069, 3037, 2962, 1735, 1657, 1601 cm<sup>-1</sup>. Anal. Calcd for C<sub>17</sub>H<sub>12</sub>ClF<sub>3</sub>O<sub>2</sub>: C, 59.93; H, 3.55. found (%): C, 59.81; H, 3.27.

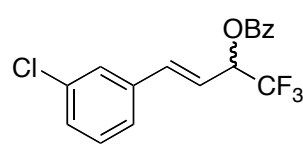

**4-(3-Chlorophenyl)-1,1,1-trifluorobut-3-en-2-yl benzoate (1e')**: White solid. Mp. 60–62 °C. <sup>1</sup>H NMR (500 MHz, CDCl<sub>3</sub>) δ 6.06 (dq, *J*<sub>HH</sub> = 7.4 Hz, *J*<sub>HF</sub> = 6.6 Hz, 1H), 6.25 (dd, *J* = 16.0, 7.4 Hz, 1H), 6.89 (d, *J* = 16.0 Hz, 1H), 7.26–7.32 (m, 3H), 7.43 (s, 1H), 7.45–7.65 (m, 3H), 8.11 (dd, *J* = 1.1, 8.3 Hz, 2H). <sup>13</sup>C NMR (125 MHz, CDCl<sub>3</sub>) δ 71.2 (q, *J*<sub>CF</sub> = 33.6 Hz), 118.8, 123.2 (q, *J*<sub>CF</sub> = 280.7 Hz), 125.3, 126.9, 128.6, 128.6, 128.9, 129.9, 130.0, 133.9, 134.7, 136.8, 137.2, 164.4. <sup>19</sup>F NMR (470 MHz, CDCl<sub>3</sub>) δ 85.5 (d, *J* = 6.6 Hz). IR (KBr) 3091, 3061, 3035, 2965, 1817, 1731, 1660, 1566 cm<sup>-1</sup>. HRMS (ESI): *m/z*: calcd for C<sub>17</sub>H<sub>12</sub>ClF<sub>3</sub>NaO<sub>2</sub>, [M+Na]<sup>+</sup> 363.0376, found 363.0375.

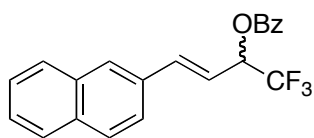

**1,1,1-Trifluoro-4-(naphthalen-2-yl)but-3-en-2-yl benzoate (1f')**: White solid. Mp. 180–182 °C.  $^1\text{H}$  NMR (500 MHz,  $\text{CDCl}_3$ )  $\delta$  6.13 (dq,  $J_{\text{HH}} = 7.6$  Hz,  $J_{\text{HF}} = 6.7$  Hz, 1H), 6.35 (dd,  $J = 15.8, 7.6$  Hz, 1H), 7.11 (d,  $J = 15.8$  Hz, 1H), 7.44–7.53 (m, 4H), 7.57–7.66 (m, 2H), 7.77–7.84 (m, 4H), 8.13 (d,  $J = 7.2$  Hz, 2H).  $^{13}\text{C}$  NMR (125 MHz,  $\text{CDCl}_3$ )  $\delta$  71.6 (dq,  $J_{\text{CF}} = 6.0, 33.6$  Hz), 117.5, 123.2, 123.4 (q,  $J_{\text{CF}} = 280.7$  Hz), 126.5, 126.6, 127.7, 127.9, 128.2, 128.4, 128.6, 128.8, 130.0, 132.4, 133.3, 133.6, 133.8, 138.9, 164.5.  $^{19}\text{F}$  NMR (470 MHz,  $\text{CDCl}_3$ )  $\delta$  85.5 (d,  $J = 6.6$  Hz). IR (KBr) 3093, 3062, 2959, 1735, 1654, 1601  $\text{cm}^{-1}$ . HR-MS (ESI):  $m/z$ : calcd for  $\text{C}_{21}\text{H}_{15}\text{F}_3\text{NaO}_2$ ,  $[\text{M}+\text{Na}]^+$  379.0922, found 379.0923.

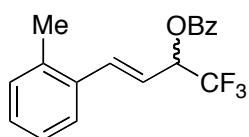

**1,1,1-Trifluoro-4-(o-tolyl)but-3-en-2-yl benzoate (1g')**: White solid. Mp. 59–62 °C.  $^1\text{H}$  NMR (500 MHz,  $\text{CDCl}_3$ )  $\delta$  2.36 (s, 3H), 6.01–6.18 (m, 2H), 7.11–7.26 (m, 5H), 7.41–7.54 (m, 3H), 7.62 (t,  $J = 7.4$  Hz, 1H), 8.12 (d,  $J = 7.4$  Hz, 2H).  $^{13}\text{C}$  NMR (125 MHz,  $\text{CDCl}_3$ )  $\delta$  19.6, 71.8 (q,  $J_{\text{CF}} = 33.6$  Hz), 118.6, 123.3 (q,  $J_{\text{CF}} = 280.7$  Hz), 125.9, 126.2, 128.6, 128.8, 128.8, 130.0, 130.5, 133.8, 134.2, 136.2, 137.0, 164.5.  $^{19}\text{F}$  NMR (470 MHz,  $\text{CDCl}_3$ )  $\delta$  85.4 (d,  $J = 6.7$  Hz). IR (KBr) 3067, 3033, 2979, 2961, 2867, 1729, 1654, 1602, 1584  $\text{cm}^{-1}$ . HRMS (ESI):  $m/z$ : calcd for  $\text{C}_{18}\text{H}_{15}\text{F}_3\text{NaO}_2$ ,  $[\text{M}+\text{Na}]^+$  343.0922, found 343.0924.

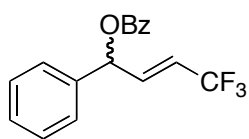

**4,4,4-Trifluoro-1-phenylbut-2-en-1-yl benzoate (6)**: Colorless oil.  $^1\text{H}$  NMR (500 MHz,  $\text{CDCl}_3$ )  $\delta$  5.93–6.03 (m, 1H), 6.59–6.67 (m, 2H), 7.31–7.48 (m 7H), 7.57 (tt,  $J = 7.4, 1.3$  Hz, 1H), 8.09 (dd,  $J = 8.4, 1.3$  Hz, 2H).  $^{13}\text{C}$  NMR (125 MHz,  $\text{CDCl}_3$ )  $\delta$  73.8, 119.3 (q,  $J_{\text{CF}} = 34.8$  Hz), 122.8 (q,  $J_{\text{CF}} = 269.5$  Hz), 127.3, 128.5, 128.9, 129.0, 129.5, 129.7, 133.4, 136.8, 137.9 (q,  $J_{\text{CF}} = 6.4$  Hz), 165.0.  $^{19}\text{F}$  NMR (470 MHz,  $\text{CDCl}_3$ )  $\delta$  97.5 (dt,  $J = 6.4, 1.8$  Hz). IR (neat) 3067, 3037, 2932, 1726, 1685, 1603, 1586, 1453  $\text{cm}^{-1}$ . HRMS (ESI):  $m/z$ : calcd for  $\text{C}_{17}\text{H}_{13}\text{F}_3\text{NaO}_2$ ,  $[\text{M}+\text{Na}]^+$  329.0766, found 329.0765.

**General Procedure for the Catalytic Allylic Alkylation:** A typical procedure is given for the reaction of (*E*)-1,1,1-trifluoro-4-phenylbut-3-en-2-yl benzoate (**1a**) with diethyl methylmalonate (**2a**) (Table 4, entry 3). To a solution of [Pd(*p*-allyl)(cod)]BF<sub>4</sub> (3.4 mg, 0.010 mmol), (*S*)-Tol-BINAP (10.2 mg, 0.015 mmol) and (*E*)-1,1,1-trifluoro-4-phenylbut-3-en-2-yl benzoate (**1a**) (61.3 mg, 0.20 mmol) in dioxane (1.0 mL) was added diethyl methylmalonate (**2a**) (105 mg, 0.60 mmol) and BSA (61.0 mg, 0.30 mmol). The reaction mixture was stirred at rt for 5 min. The reaction mixture was then stirred at 60 °C for 24 h. The mixture was quenched with brine and/or H<sub>2</sub>O (1 mL), then extracted with ethyl acetate (3 x 2 mL). The combined organic layers were dried over MgSO<sub>4</sub> and concentrated in vacuo. The residue was chromatographed on silica gel (hexane/Et<sub>2</sub>O/CH<sub>2</sub>Cl<sub>2</sub> = 5/1/1) to give 64.6 mg (91%) of alkylation product **3aa**. Values of ee was determined by chiral HPLC: Daicel CHIRALCEL OJ-H (hexane-2-PrOH = 19:1).

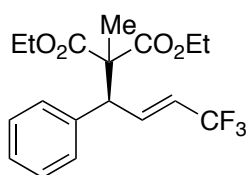

**(*S*)-Diethyl 2-methyl-2-(4,4,4-trifluoro-1-phenylbut-2-en-1-yl)malonate ((*S*)-3aa):** Colorless oil. <sup>1</sup>H NMR (500 MHz, CDCl<sub>3</sub>) δ 1.20 (t, *J* = 7.2 Hz, 3H), 1.27 (t, *J* = 7.2 Hz, 3H), 1.39 (s, 3H), 4.12 (q, *J* = 7.2 Hz, 2H), 4.15–4.27 (m, 3H), 5.56 (dq, *J*<sub>HH</sub> = 15.7 Hz, *J*<sub>HF</sub> = 6.3 Hz, *J*<sub>HH</sub> = 1.4 Hz, 1H), 6.91 (ddq, *J*<sub>HH</sub> = 15.7, 7.6 Hz, *J*<sub>HF</sub> = 2.2 Hz, 1H), 7.17–7.21 (m, 2H), 7.26–7.36 (m, 3H). <sup>13</sup>C NMR (125 MHz, CDCl<sub>3</sub>) δ 13.7, 13.7, 19.3, 52.2, 58.1, 61.6, 61.6, 120.3 (q, *J*<sub>CF</sub> = 33.4 Hz), 123.0 (q, *J*<sub>CF</sub> = 269.6 Hz), 127.8, 128.6, 129.5, 137.0, 140.0 (q, *J*<sub>CF</sub> = 6.6 Hz), 170.4, 170.9. <sup>19</sup>F NMR (470 MHz, CDCl<sub>3</sub>) δ 97.7 (dt, *J* = 4.2, 2.2 Hz). IR (neat) 2986, 1736, 1677, 1496, 1454, 1381 cm<sup>-1</sup>. HRMS (ESI): *m/z*: calcd for C<sub>18</sub>H<sub>21</sub>F<sub>3</sub>NaO<sub>4</sub>, [M+Na]<sup>+</sup> 381.1290, found 381.1281. [α]<sub>D</sub><sup>26</sup> +24.3 (*c* 5.96, CHCl<sub>3</sub>) (96% ee). Enantiomeric purity was determined by HPLC using a Daicel CHIRALCEL OJ-H (hexane/2-propanol = 19/1, flow: 1.0 mL/min, 215 nm, 35 °C, *t*<sub>R</sub> 4.13 min (major); *t*<sub>R</sub> 5.14 min (minor)).

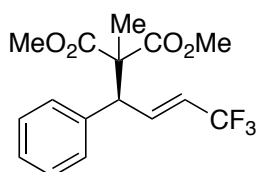

**(*S*)-Dimethyl 2-methyl-2-(4,4,4-trifluoro-1-phenylbut-2-en-1-yl)malonate ((*S*)-3ab):** Colorless oil. <sup>1</sup>H NMR (500 MHz, CDCl<sub>3</sub>) δ 1.41 (s, 3H), 3.65 (s, 3H), 3.74 (s, 3H), 4.19 (dt, *J* = 7.9, 1.4 Hz, 1H), 5.60 (dq, *J*<sub>HH</sub> = 15.8 Hz, *J*<sub>HF</sub> = 6.3 Hz, *J*<sub>HH</sub> = 1.4 Hz, 1H), 6.89 (ddq, *J*<sub>HH</sub> = 15.8, 7.9 Hz, *J*<sub>HF</sub> = 2.1 Hz, 1H), 7.17–7.21 (m, 2H), 7.26–7.35 (m,

3H).  $^{13}\text{C}$  NMR (125 MHz,  $\text{CDCl}_3$ )  $\delta$  19.0, 52.3, 52.5, 52.6, 58.3, 120.7 (q,  $J_{\text{CF}} = 33.6$  Hz), 122.9 (q,  $J_{\text{CF}} = 269.5$  Hz), 127.9, 128.6, 129.4, 136.7, 139.3 (q,  $J_{\text{CF}} = 6.8$  Hz), 170.8, 171.1.  $^{19}\text{F}$  NMR (470 MHz,  $\text{CDCl}_3$ )  $\delta$  97.7 (dt,  $J = 6.3, 2.0$  Hz). IR (neat) 3033, 3005, 2956, 2846, 1738, 1677, 1497, 1455, 1436  $\text{cm}^{-1}$ . HRMS (ESI):  $m/z$ : calcd for  $\text{C}_{16}\text{H}_{18}\text{F}_3\text{O}_4$ ,  $[\text{M}+\text{H}]^+$  331.1157, found 331.1148.  $[\alpha]_{\text{D}}^{27} +19.7$  ( $c$  5.98,  $\text{CHCl}_3$ ) (83% ee). Enantiomeric purity was determined by HPLC using a Daicel CHIRALCEL OJ-H (hexane/2-propanol = 19/1, flow: 1.0 mL/min, 215 nm, 35 °C,  $t_{\text{R}}$  5.33 min (major);  $t_{\text{R}}$  6.32 min (minor)).

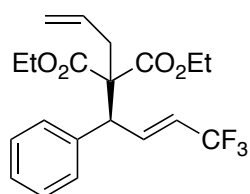

**(S)-Diethyl 2-allyl-2-(4,4,4-trifluoro-1-phenylbut-2-en-1-yl)**

**malonate ((S)-3ac):** Colorless oil.  $^1\text{H}$  NMR (500 MHz,  $\text{CDCl}_3$ )

$\delta$  1.25 (t,  $J = 7.2$  Hz, 3H), 1.29 (t,  $J = 7.2$  Hz, 3H), 2.31 (dd,  $J = 14.5, 8.2$  Hz, 1H), 2.56 (dd,  $J = 14.5, 6.4$  Hz, 1H), 4.13 (dt,  $J = 6.7, 1.7$  Hz, 5H), 4.96–5.03 (m, 1H), 5.04–5.10 (m, 1H), 5.39

(dq,  $J_{\text{HH}} = 15.8$  Hz,  $J_{\text{HF}} = 6.6$  Hz,  $J_{\text{HH}} = 1.7$  Hz, 1H), 5.66–5.77 (m, 1H), 6.96 (ddq,  $J_{\text{HH}} = 15.8, 6.7$  Hz,  $J_{\text{HF}} = 2.1$  Hz, 1H), 7.09–7.14 (m, 2H), 7.27–7.36 (m, 3H).  $^{13}\text{C}$  NMR (125 MHz,  $\text{CDCl}_3$ )  $\delta$  13.8, 14.0, 38.7, 51.1, 61.6, 61.6, 119.3, 119.6 (q,  $J_{\text{CF}} = 33.2$  Hz), 123.1 (q,  $J_{\text{CF}} = 269.3$  Hz), 127.9, 128.7, 129.4, 132.3, 136.4, 141.0 (q,  $J_{\text{CF}} = 6.8$  Hz), 169.7, 169.9.  $^{19}\text{F}$  NMR (470 MHz,  $\text{CDCl}_3$ )  $\delta$  97.9 (dt,  $J = 6.4, 2.3$  Hz). IR (neat) 3081, 3033, 2984, 2940, 2907, 1731, 1677, 1640, 1496  $\text{cm}^{-1}$ . HRMS (ESI):  $m/z$ : calcd for  $\text{C}_{20}\text{H}_{23}\text{F}_3\text{NaO}_4$ ,  $[\text{M}+\text{Na}]^+$  407.1446, found 407.1437.  $[\alpha]_{\text{D}}^{26} +31.7$  ( $c$  6.60,  $\text{CHCl}_3$ ) (92% ee). Enantiomeric purity was determined by HPLC using a Daicel CHIRALPAK AD-H (hexane/2-propanol = 19/1, flow: 1.0 mL/min, 215 nm, 35 °C,  $t_{\text{R}}$  3.78 min (minor);  $t_{\text{R}}$  4.16 min (major)).

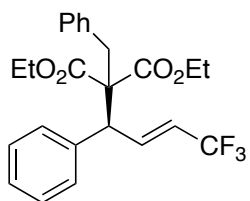

**(S)-Diethyl 2-benzyl-2-(4,4,4-trifluoro-1-phenylbut-2-en-1-yl)**

**malonate ((S)-3ad):** Colorless oil;  $^1\text{H}$  NMR (500 MHz,  $\text{CDCl}_3$ )  $\delta$

1.04 (t,  $J = 7.2$  Hz, 3H), 1.25 (t,  $J = 7.2$  Hz, 3H), 2.90 (d,  $J = 14.0$  Hz, 1H), 3.19 (d,  $J = 14.0$  Hz, 1H), 3.91 (dq,  $J = 10.6, 7.2$  Hz, 1H), 4.08 (dq,  $J = 10.6, 7.2$  Hz, 1H), 4.16–4.30 (m, 3H), 5.32 (dq,  $J_{\text{HH}}$

= 15.8 Hz,  $J_{\text{HF}} = 6.6$  Hz,  $J_{\text{HH}} = 1.7$  Hz, 1H), 6.90 (ddq,  $J_{\text{HH}} = 15.8, 6.7$  Hz,  $J_{\text{HF}} = 2.1$  Hz,

1H), 7.03–7.10 (m, 2H), 7.11–7.16 (m, 2H), 7.17–7.22 (m, 3H), 7.29–7.39 (m, 3H). <sup>13</sup>C NMR (125 MHz, CDCl<sub>3</sub>) δ 13.6, 13.7, 40.4, 52.3, 61.5, 61.6, 63.0, 119.5 (q, *J*<sub>CF</sub> = 33.2 Hz), 123.1 (q, *J*<sub>CF</sub> = 269.5 Hz), 126.93, 127.9, 128.0, 128.8, 129.6, 130.3, 136.0, 136.5, 141.3 (q, *J*<sub>CF</sub> = 6.4 Hz), 169.8, 169.9. <sup>19</sup>F NMR (470 MHz, CDCl<sub>3</sub>) δ 97.9 (dt, *J* = 6.3, 2.3 Hz). IR (neat) 3064, 3033, 2984, 2940, 2906, 1728, 1676, 1603, 1496, 1454, 1369 cm<sup>-1</sup>. HRMS (ESI): *m/z*: calcd for C<sub>24</sub>H<sub>25</sub>F<sub>3</sub>NaO<sub>4</sub>, [M+Na]<sup>+</sup> 457.1603, found 457.1593. [α]<sub>D</sub><sup>26</sup> +10.6 (*c* 7.63, CHCl<sub>3</sub>) (77% ee). Enantiomeric purity was determined by HPLC using a Daicel CHIRALPAK AD-H (hexane/2-propanol = 19/1, flow: 1.0 mL/min, 215 nm, 35 °C, *t*<sub>R</sub> 4.20 min (minor); *t*<sub>R</sub> 5.11 min (major)).

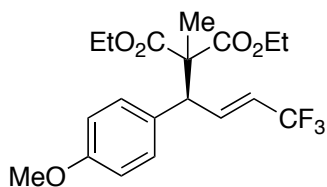

**(S)-Diethyl 2-methyl-2-(4,4,4-trifluoro-1-(4-methoxyphenyl)but-2-en-1-yl)malonate ((S)-3ba):** Colorless oil. <sup>1</sup>H NMR (500 MHz, CDCl<sub>3</sub>) δ 1.21 (t, *J* = 7.2 Hz, 3H), 1.27 (t, *J* = 7.2 Hz, 3H), 1.37 (s, 3H), 3.79 (s, 3H), 4.08–4.28 (m, 5H), 5.55 (dq, *J*<sub>HH</sub> = 15.7 Hz, *J*<sub>HF</sub> = 6.4 Hz, *J*<sub>HH</sub> = 1.5 Hz, 1H), 6.81–6.92 (m, 3H), 6.81–6.92 (m, 2H). <sup>13</sup>C NMR (125 MHz, CDCl<sub>3</sub>) δ 13.8, 13.9, 19.2, 51.4, 55.2 (d, *J*<sub>CF</sub> = 2.4 Hz), 58.1, 61.6, 61.6, 113.9, 120.1 (q, *J*<sub>CF</sub> = 33.2 Hz), 123.0 (q, *J*<sub>CF</sub> = 269.3 Hz), 128.7, 130.6, 140.1 (q, *J*<sub>CF</sub> = 7.2 Hz), 159.1, 170.5, 171.0. <sup>19</sup>F NMR (470 MHz, CDCl<sub>3</sub>) δ 97.8 (dt, *J* = 4.3, 2.1 Hz). IR (neat) 2986, 2941, 2908, 2840, 1732, 1677, 1611, 1583, 1514, 1465 cm<sup>-1</sup>. HRMS (ESI): *m/z*: calcd for C<sub>19</sub>H<sub>23</sub>F<sub>3</sub>NaO<sub>5</sub>, [M+Na]<sup>+</sup> 411.1395, found 411.1389. [α]<sub>D</sub><sup>26</sup> +22.9 (*c* 6.45, CHCl<sub>3</sub>) (91% ee). Enantiomeric purity was determined by HPLC using a Daicel CHIRALCEL OJ-H (hexane/2-propanol = 19/1, flow: 1.0 mL/min, 215 nm, 35 °C, *t*<sub>R</sub> 5.06 min (major); *t*<sub>R</sub> 6.07 min (minor)).

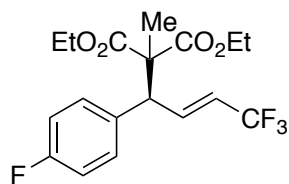

**(S)-Diethyl 2-methyl-2-(4,4,4-trifluoro-1-(4-fluorophenyl)but-2-en-1-yl)malonate ((S)-3ca):** Colorless oil. <sup>1</sup>H NMR (500 MHz, CDCl<sub>3</sub>) δ 1.20 (t, *J* = 7.2, Hz, 3H), 1.26 (t, *J* = 7.2 Hz, 3H), 1.38 (s, 3H), 4.12 (q, *J* = 7.2 Hz, 2H), 4.15–4.26 (m, 3H), 5.55 (dq, *J*<sub>HH</sub> = 15.8 Hz, *J*<sub>HF</sub> = 6.3 Hz, *J*<sub>HH</sub> = 1.4 Hz, 1H), 6.88 (ddq, *J*<sub>HH</sub> = 15.8, 7.7 Hz, *J*<sub>HF</sub> = 2.2 Hz, 1H), 6.97–7.06 (m, 2H), 7.15–7.23 (m, 2H). <sup>13</sup>C NMR (125 MHz, CDCl<sub>3</sub>) δ 13.8, 13.9, 19.2, 51.4, 58.0, 61.7, 61.7, 115.5 (d,



$J_{CF} = 21.6$  Hz), 120.6 (q,  $J_{CF} = 33.6$  Hz), 122.9 (q,  $J_{CF} = 269.5$  Hz), 131.1 (d,  $J_{CF} = 7.2$  Hz), 132.7 (d,  $J_{CF} = 3.6$  Hz), 139.5 (q,  $J_{CF} = 6.8$  Hz), 162.2 (d,  $J_{CF} = 247.1$  Hz), 170.3, 170.7.  $^{19}\text{F}$  NMR (470 MHz,  $\text{CDCl}_3$ )  $\delta$  47.6 (tt,  $J = 8.5, 5.3$  Hz, 1F), 97.7 (dt,  $J = 4.2, 2.1$  Hz, 3F). IR (neat) 2987, 2943, 2908, 1732, 1678, 1605, 1511  $\text{cm}^{-1}$ . HR-MS (ESI):  $m/z$ : calcd for  $\text{C}_{18}\text{H}_{20}\text{F}_4\text{NaO}_4$ ,  $[\text{M}+\text{Na}]^+$  399.1195, found 399.1191.  $[\alpha]_{\text{D}}^{26} +21.4$  ( $c$  6.11,  $\text{CHCl}_3$ ) (96% ee). Enantiomeric purity was determined by HPLC using a Daicel CHIRALCEL OJ-H (hexane/2-propanol = 19/1, flow: 1.0 mL/min, 215 nm, 35  $^{\circ}\text{C}$ ,  $t_{\text{R}}$  4.20 min (major);  $t_{\text{R}}$  4.92 min (minor)).

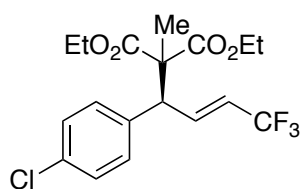

**(S)-Diethyl 2-(1-(4-chlorophenyl)-4,4,4-trifluorobut-2-en-1-yl)-2-methylmalonate ((S)-3da):** Colorless oil.  $^1\text{H}$  NMR (500 MHz,  $\text{CDCl}_3$ )  $\delta$  1.21 (t,  $J = 7.2$  Hz, 3H), 1.26 (t,  $J = 7.2$  Hz, 3H), 1.38 (s, 3H), 4.09–4.27 (m, 5H), 5.56 (dq,  $J_{\text{HH}} = 15.6$  Hz,  $J_{\text{HF}} = 6.3$  Hz,  $J_{\text{HH}} = 1.3$  Hz, 1H), 6.87 (ddq,  $J_{\text{HH}} = 15.6, 7.7$  Hz,  $J_{\text{HF}} = 2.1$  Hz, 1H), 7.13–7.17 (m, 2H), 7.28–7.32 (m, 2H).  $^{13}\text{C}$  NMR (125 MHz,  $\text{CDCl}_3$ )  $\delta$  13.8, 13.9, 19.2, 51.5, 57.9, 61.7, 61.8, 120.7 (q,  $J_{CF} = 33.6$  Hz), 122.8 (q,  $J_{CF} = 269.5$  Hz), 128.8, 130.9, 133.8, 135.5, 139.2 (q,  $J_{CF} = 6.4$  Hz), 170.2, 170.7.  $^{19}\text{F}$  NMR (470 MHz,  $\text{CDCl}_3$ )  $\delta$  97.6 (dt,  $J = 4.2, 2.1$  Hz). IR (neat) 2986, 2942, 2908, 2877, 1732, 1678, 1595, 1493, 1449, 1381  $\text{cm}^{-1}$ . HRMS (ESI):  $m/z$ : calcd for  $\text{C}_{18}\text{H}_{20}\text{ClF}_3\text{NaO}_4$ ,  $[\text{M}+\text{Na}]^+$  415.0900, found 415.0892.  $[\alpha]_{\text{D}}^{26} +24.1$  ( $c$  6.87,  $\text{CHCl}_3$ ) (94% ee). Enantiomeric purity was determined by HPLC using a Daicel CHIRALCEL OJ-H (hexane/2-propanol = 9/1, flow: 1.0 mL/min, 215 nm, 35  $^{\circ}\text{C}$ ,  $t_{\text{R}}$  3.88 min (major);  $t_{\text{R}}$  4.25 min (minor)).

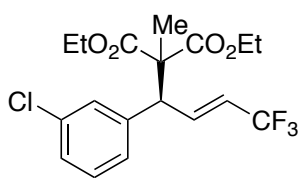

**(S)-Diethyl 2-(1-(3-chlorophenyl)-4,4,4-trifluorobut-2-en-1-yl)-2-methylmalonate ((S)-3ea):** Colorless oil.  $^1\text{H}$  NMR (500 MHz,  $\text{CDCl}_3$ )  $\delta$  1.21 (t,  $J = 7.2$  Hz, 3H), 1.27 (t,  $J = 7.2$  Hz, 3H), 1.40 (s, 3H), 4.10–4.28 (m, 5H), 5.59 (dq,  $J_{\text{HH}} = 15.6$  Hz,  $J_{\text{HF}} = 6.3$  Hz,  $J_{\text{HH}} = 1.1$  Hz, 1H), 6.87 (ddq,  $J_{\text{HH}} = 15.6, 7.8$  Hz,  $J_{\text{HF}} = 2.1$  Hz, 1H), 7.07–7.13 (m, 1H), 7.20–7.31 (m, 3H).  $^{13}\text{C}$  NMR (125 MHz,  $\text{CDCl}_3$ )  $\delta$  13.9, 19.2, 51.8, 58.0, 61.8, 61.8, 120.9 (q,  $J_{CF} = 33.6$  Hz), 122.8 (q,  $J_{CF} = 269.9$  Hz), 127.6, 128.0, 129.7, 129.8, 134.4, 138.9 (q,  $J_{CF} = 7.2$  Hz), 170.1, 170.6.  $^{19}\text{F}$  NMR (470 MHz,

CDCl<sub>3</sub>)  $\delta$  97.6 (dt,  $J = 4.2, 2.0$  Hz). IR (neat) 3071, 2986, 2943, 2907, 2877, 1732, 1678, 1596, 1573, 1477, 1366 cm<sup>-1</sup>. HRMS (ESI):  $m/z$ : calcd for C<sub>18</sub>H<sub>20</sub>ClF<sub>3</sub>NaO<sub>4</sub>, [M+Na]<sup>+</sup> 415.0900, found 415.0894.  $[\alpha]_D^{26} +20.6$  ( $c$  6.26, CHCl<sub>3</sub>) (94% ee). Enantiomeric purity was determined by HPLC using a Daicel CHIRALCEL OJ-H (hexane/2-propanol = 19/1, flow: 1.0 mL/min, 215 nm, 35 °C,  $t_R$  8.08 min (major);  $t_R$  8.65 min (minor)).

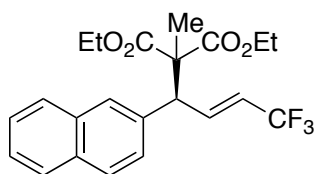

**(S)-Diethyl 2-methyl-2-(4,4,4-trifluoro-1-(naphthalen-2-yl)but-2-en-1-yl)malonate ((S)-3fa):** Colorless oil; <sup>1</sup>H NMR (500 MHz, CDCl<sub>3</sub>)  $\delta$  1.19 (t,  $J = 7.2$  Hz, 3H), 1.27 (t,  $J = 7.2$  Hz, 3H), 1.43 (s, 3H), 4.12 (dq  $J = 14.3, 1.4$  Hz, 2H), 4.18–4.31 (m, 2H), 4.36 (dd,  $J = 7.4, 1.4$  Hz, 1H), 5.59 (dq,  $J_{HH} = 15.8$  Hz,  $J_{HF} = 6.3$  Hz,  $J_{HH} = 1.4$  Hz, 1H), 7.01 (ddq,  $J_{HH} = 15.8, 7.4$  Hz,  $J_{HF} = 2.1$  Hz, 1H), 7.30 (dd,  $J = 8.4, 1.9$  Hz, 1H), 7.44–7.51 (m, 2H), 7.68 (s, 1H), 7.76–7.85 (m, 3H). <sup>13</sup>C NMR (125 MHz, CDCl<sub>3</sub>)  $\delta$  13.9, 19.5, 52.3, 58.1, 61.7, 61.7, 120.5 (q,  $J_{CF} = 33.6$  Hz), 123.0 (q,  $J_{CF} = 269.9$  Hz), 126.2, 126.3, 126.3, 126.9, 127.6, 127.8, 128.3, 129.0, 132.7, 133.2, 134.4, 139.8 (q,  $J_{CF} = 6.8$  Hz), 170.5, 170.9. <sup>19</sup>F NMR (470 MHz, CDCl<sub>3</sub>)  $\delta$  97.8 (dt,  $J = 6.3, 1.9$  Hz). IR (neat) 3060, 2985, 2941, 2906, 1731, 1677, 1600, 1508, 1463, 1381 cm<sup>-1</sup>. HR-MS (ESI):  $m/z$ : calcd for C<sub>22</sub>H<sub>23</sub>F<sub>3</sub>NaO<sub>4</sub>, [M+Na]<sup>+</sup> 431.1446, found 431.1443.  $[\alpha]_D^{26} +28.5$  ( $c$  5.48, CHCl<sub>3</sub>) (96% ee). Enantiomeric purity was determined by HPLC using a Daicel CHIRALPAK AD-H (hexane/2-propanol = 99/1, flow: 1.0 mL/min, 254 nm, 35 °C,  $t_R$  8.94 min (major);  $t_R$  9.94 min (minor)).

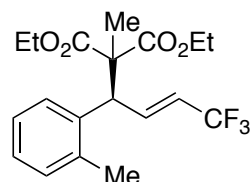

**(S)-Diethyl 2-methyl-2-(4,4,4-trifluoro-1-(*o*-tolyl)but-2-en-1-yl)malonate ((S)-3ga):** Colorless oil. <sup>1</sup>H NMR (500 MHz, CDCl<sub>3</sub>)  $\delta$  1.16 (t,  $J = 7.2$  Hz, 3H), 1.28 (t,  $J = 7.2$  Hz, 3H), 1.39 (s, 3H), 2.36 (s, 3H), 4.11 (dq  $J = 7.2, 2.0$  Hz, 2H), 4.20–4.31 (m, 2H), 4.55–4.61 (m, 1H), 5.38 (dq,  $J_{HH} = 15.8$  Hz,  $J_{HF} = 6.3$  Hz,  $J_{HH} = 1.7$  Hz, 1H), 6.84 (ddq,  $J_{HH} = 15.8, 6.3$  Hz,  $J_{HF} = 2.0$  Hz, 1H), 7.06–7.11 (m, 1H), 7.14–7.21 (m, 3H). <sup>13</sup>C NMR (125 MHz, CDCl<sub>3</sub>)  $\delta$  13.8, 13.8, 19.8, 20.1, 46.2, 57.9, 61.7, 61.7, 119.5 (q,  $J_{CF} = 33.6$  Hz), 123.1 (q,  $J_{CF} = 268.7$  Hz), 126.5, 127.5, 127.7, 130.9, 135.3, 137.2,

140.8 (q,  $J_{CF} = 6.4$  Hz), 170.9, 171.3.  $^{19}\text{F}$  NMR (470 MHz,  $\text{CDCl}_3$ )  $\delta$  98.0 (dt,  $J = 4.2$ , 2.1 Hz). IR (neat) 2985, 2942, 2908, 2876, 1732, 1675, 1492, 1464, 1380  $\text{cm}^{-1}$ . HRMS (ESI):  $m/z$ : calcd for  $\text{C}_{19}\text{H}_{24}\text{F}_3\text{O}_4$ ,  $[\text{M}+\text{H}]^+$  373.1627, found 373.1617.  $[\alpha]_{\text{D}}^{26} +29.2$  ( $c$  5.54,  $\text{CHCl}_3$ ) (86% ee). Enantiomeric purity was determined by HPLC using a Daicel CHIRALCEL OJ-H (hexane/2-propanol = 19/1, flow: 1.0 mL/min, 215 nm, 35  $^\circ\text{C}$ ,  $t_{\text{R}}$  3.80 min (major);  $t_{\text{R}}$  6.30 min (minor)).

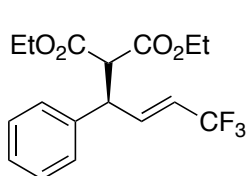

**(R)-Diethyl 2-(4,4,4-trifluoro-1-phenylbut-2-en-1-yl)malonate**

**((R)-5aa)**<sup>6</sup>: Colorless oil.  $^1\text{H}$  NMR (500 MHz,  $\text{CDCl}_3$ )  $\delta$  1.00 (t,

$J = 7.2$  Hz, 3H), 1.28 (t,  $J = 7.2$  Hz, 3H), 3.84 (d,  $J = 10.6$  Hz, 1H), 3.93–4.00 (m, 2H), 4.17–4.26 (m, 3H), 5.66 (dq,  $J_{\text{HH}} = 15.8$  Hz,

$J_{\text{HF}} = 6.3$  Hz,  $J_{\text{HH}} = 1.1$  Hz, 1H), 6.57 (ddq,  $J_{\text{HH}} = 15.8$ , 8.2 Hz,  $J_{\text{HF}} = 2.1$  Hz, 1H), 7.20–7.36 (m, 5H).  $^{13}\text{C}$  NMR (125 MHz,  $\text{CDCl}_3$ )  $\delta$  13.6, 13.9, 47.3, 56.7, 61.6, 61.9, 120.2

(q,  $J_{\text{CF}} = 34.0$  Hz), 122.6 (q,  $J_{\text{CF}} = 269.5$  Hz), 127.7, 128.1, 128.9, 137.8, 139.5 (q,  $J_{\text{CF}} = 6.4$  Hz), 166.8, 167.3.  $^{19}\text{F}$  NMR (470 MHz,  $\text{CDCl}_3$ )  $\delta$  97.5 (dt,  $J = 6.3$ , 1.9 Hz). IR

(neat) 3036, 2986, 2941, 1734, 1679, 1496, 1455, 1370  $\text{cm}^{-1}$ .  $[\alpha]_{\text{D}}^{25} +15.2$  ( $c$  4.45,  $\text{CHCl}_3$ ) (87% ee). Enantiomeric purity was determined by HPLC using a Daicel CHIRALPAK AD-H (hexane/2-propanol = 19/1, flow: 1.0 mL/min, 215 nm, 35  $^\circ\text{C}$ ,  $t_{\text{R}}$  8.21 min (major);  $t_{\text{R}}$  9.69 min (minor)).

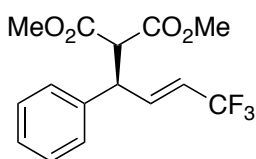

**(R)-Dimethyl 2-(4,4,4-trifluoro-1-phenylbut-2-en-1-yl)malonate**

**((R)-5ab)**: Colorless oil.  $^1\text{H}$  NMR (500 MHz,  $\text{CDCl}_3$ )  $\delta$

3.52 (s, 3H), 3.76 (s, 3H), 3.89 (d,  $J = 10.9$  Hz, 1H), 4.21 (dd,  $J = 10.9$ , 8.3 Hz, 1H), 5.66 (dq,  $J_{\text{HH}} = 15.8$  Hz,  $J_{\text{HF}} = 6.3$  Hz,  $J_{\text{HH}} =$

1.1 Hz, 1H), 6.56 (ddq,  $J_{\text{HH}} = 15.8$ , 8.3 Hz,  $J_{\text{HF}} = 2.1$  Hz, 1H), 7.18–7.39 (m, 5H).  $^{13}\text{C}$

NMR (125 MHz,  $\text{CDCl}_3$ )  $\delta$  47.3, 52.6, 52.7, 56.6, 120.4 (q,  $J_{\text{CF}} = 33.6$  Hz), 122.6 (q,  $J_{\text{CF}} = 269.5$  Hz), 127.8, 128.0, 129.9, 137.6, 139.2 (q,  $J_{\text{CF}} = 6.4$  Hz), 167.1, 167.7.  $^{19}\text{F}$

NMR (470 MHz,  $\text{CDCl}_3$ )  $\delta$  97.5 (dt,  $J = 6.3$ , 1.8 Hz). IR (neat) 3066, 3034, 2958, 2848, 1749, 1679, 1437  $\text{cm}^{-1}$ . HRMS (ESI):  $m/z$ : calcd for  $\text{C}_{15}\text{H}_{15}\text{F}_3\text{NaO}_4$ ,  $[\text{M}+\text{Na}]^+$

339.0820, found 339.0814.  $[\alpha]_{\text{D}}^{26} +16.8$  ( $c$  5.27,  $\text{CHCl}_3$ ) (81% ee). Enantiomeric purity was determined by HPLC using a Daicel CHIRALPAK AD-H

(hexane/2-propanol = 19/1, flow: 1.0 mL/min, 215 nm, 35 °C,  $t_R$  8.04 min (major);  $t_R$  8.58 min (minor)).

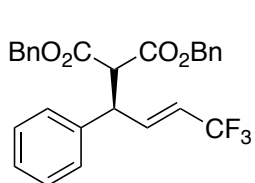

**(R)-Dibenzyl 2-(4,4,4-trifluoro-1-phenylbut-2-en-1-yl)malonate ((R)-5ac):** Colorless oil;  $^1\text{H}$  NMR (500 MHz,  $\text{CDCl}_3$ )  $\delta$  3.96 (d,  $J = 10.9$  Hz, 1H), 4.23 (dd,  $J = 10.9, 8.1$  Hz, 1H), 4.88 (d,  $J = 12.3$  Hz, 1H), 4.92 (d,  $J = 12.0$  Hz, 1H), 5.13 (d,  $J = 12.3$  Hz, 1H), 5.16 (d,  $J = 12.0$  Hz, 1H), 5.59 (dq,  $J_{\text{HH}} = 15.8$  Hz,  $J_{\text{HF}} = 6.3$  Hz,  $J_{\text{HH}} = 1.1$  Hz, 1H), 6.55 (ddq,  $J_{\text{HH}} = 15.8, 8.1$  Hz,  $J_{\text{HF}} = 2.1$  Hz, 1H), 7.03 (dd,  $J = 1.6, 7.9$  Hz, 2H), 7.14–7.18 (m, 2H), 7.21–7.37 (m, 11H).  $^{13}\text{C}$  NMR (125 MHz,  $\text{CDCl}_3$ )  $\delta$  47.2, 56.7, 67.3, 67.6, 120.4 (q,  $J_{\text{CF}} = 33.6$  Hz), 122.6 (q,  $J_{\text{CF}} = 269.9$  Hz), 127.8, 128.0, 128.1, 128.3, 128.4, 128.4, 128.5, 128.6, 129.0, 134.8, 134.8, 137.5, 139.2 (q,  $J_{\text{CF}} = 6.0$  Hz), 166.5, 166.9.  $^{19}\text{F}$  NMR (470 MHz,  $\text{CDCl}_3$ )  $\delta$  97.6 (dt,  $J = 6.4, 1.9$  Hz). IR (neat) 3066, 3034, 2959, 1756, 1736, 1678, 1602, 1497, 1455  $\text{cm}^{-1}$ . HRMS (ESI):  $m/z$ : calcd for  $\text{C}_{27}\text{H}_{24}\text{F}_3\text{O}_4$ ,  $[\text{M}+\text{H}]^+$  469.1627, found 469.1619.  $[\alpha]_{\text{D}}^{26} +9.89$  ( $c$  7.45,  $\text{CHCl}_3$ ) (78% ee). Enantiomeric purity was determined by HPLC using a Daicel CHIRALPAK AD-H (hexane/2-propanol = 19/1, flow: 1.0 mL/min, 215 nm, 35 °C,  $t_R$  17.7 min (minor);  $t_R$  21.5 min (major)).

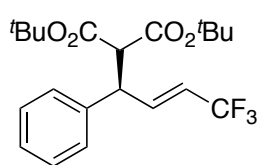

**(R)-Di-tert-butyl 2-(4,4,4-trifluoro-1-phenylbut-2-en-1-yl)malonate ((R)-5ad):** White solid. Mp. 99–105 °C.  $^1\text{H}$  NMR (500 MHz,  $\text{CDCl}_3$ )  $\delta$  1.21 (s, 9H), 1.47 (s, 9H), 3.66 (d,  $J = 10.9$  Hz, 1H), 4.10 (dd,  $J = 10.9, 8.0$  Hz, 1H), 5.62 (dq,  $J_{\text{HH}} = 15.8$  Hz,  $J_{\text{HF}} = 7.9$  Hz,  $J_{\text{HH}} = 1.1$  Hz, 1H), 6.57 (ddq,  $J_{\text{HH}} = 15.8, 8.0$  Hz,  $J_{\text{HF}} = 2.1$  Hz, 1H), 7.18–7.35 (m, 5H).  $^{13}\text{C}$  NMR (125 MHz,  $\text{CDCl}_3$ )  $\delta$  27.5, 27.8, 47.2, 58.3, 82.0, 82.5, 119.8 (q,  $J_{\text{CF}} = 33.6$  Hz), 122.8 (q,  $J_{\text{CF}} = 269.9$  Hz), 127.5, 128.3, 128.8, 138.2, 140.1 (q,  $J_{\text{CF}} = 6.4$  Hz), 166.1, 166.7.  $^{19}\text{F}$  NMR (470 MHz,  $\text{CDCl}_3$ )  $\delta$  97.7 (dt,  $J = 6.3, 1.9$  Hz). IR (KBr) 3066, 3055, 2990, 2936, 1740, 1682, 1602, 1584, 1363  $\text{cm}^{-1}$ . HRMS (ESI):  $m/z$ : calcd for  $\text{C}_{21}\text{H}_{27}\text{F}_3\text{NaO}_4$ ,  $[\text{M}+\text{Na}]^+$  423.1759, found 423.1751.  $[\alpha]_{\text{D}}^{26} +3.66$  ( $c$  4.48,  $\text{CHCl}_3$ ) (52% ee). Enantiomeric purity was determined by HPLC using a Daicel

CHIRALPAK AD-H (hexane/2-propanol = 19/1, flow: 1.0 mL/min, 215 nm, 35 °C,  $t_R$  6.37 min (major);  $t_R$  8.47 min (minor)).

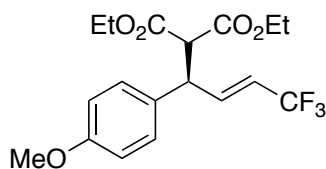

**(R)-Diethyl 2-(4,4,4-trifluoro-1-(4-methoxyphenyl)but-2-en-1-yl)malonate ((R)-5ba):** Colorless oil.  $^1\text{H}$  NMR (500 MHz,  $\text{CDCl}_3$ )  $\delta$  1.03 (t,  $J = 7.2$  Hz, 3H), 1.27 (t,  $J = 7.2$  Hz, 3H), 3.76–3.82 (m, 4H), 3.93–4.04 (m, 2H), 4.12–4.19 (m, 1H), 4.22 (d,  $J = 7.2$  Hz, 2H), 5.63 (dq,  $J_{\text{HH}} = 15.6$  Hz,  $J_{\text{HF}} = 6.2$  Hz,  $J_{\text{HH}} = 1.1$  Hz, 1H), 6.55 (ddq,  $J_{\text{HH}} = 15.6$ , 8.0 Hz,  $J_{\text{HF}} = 2.0$  Hz, 1H), 6.86 (d,  $J = 8.9$  Hz, 2H), 7.14 (d,  $J = 8.9$  Hz, 2H).  $^{13}\text{C}$  NMR (125 MHz,  $\text{CDCl}_3$ )  $\delta$  13.7, 13.9, 46.5, 55.2 (d,  $J_{\text{CF}} = 2.4$  Hz), 56.9, 61.6, 61.9, 114.2, 119.9 (q,  $J_{\text{CF}} = 33.6$  Hz), 122.7 (q,  $J_{\text{CF}} = 269.5$  Hz), 129.2, 129.6, 139.7 (q,  $J_{\text{CF}} = 6.4$  Hz), 159.0, 166.8, 167.4.  $^{19}\text{F}$  NMR (470 MHz,  $\text{CDCl}_3$ )  $\delta$  97.6 (dt,  $J = 6.3$ , 1.9 Hz). IR (neat) 2984, 2940, 2908, 2840, 1734, 1678, 1611, 1585, 1514, 1465  $\text{cm}^{-1}$ . HRMS (ESI):  $m/z$ : calcd for  $\text{C}_{18}\text{H}_{21}\text{F}_3\text{NaO}_5$ ,  $[\text{M}+\text{Na}]^+$  397.1239, found 397.1234.  $[\alpha]_{\text{D}}^{26} +14.0$  ( $c$  5.41,  $\text{CHCl}_3$ ) (88% ee). Enantiomeric purity was determined by HPLC using a Daicel CHIRALPAK AD-H (hexane/2-propanol = 19/1, flow: 1.0 mL/min, 215 nm, 35 °C,  $t_R$  12.0 min (major);  $t_R$  16.9 min (minor)).

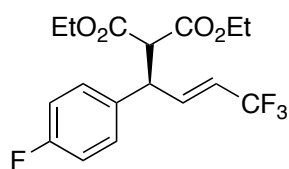

**(R)-Diethyl 2-(4,4,4-trifluoro-1-(4-fluorophenyl)but-2-en-1-yl)malonate ((R)-5ca):** Colorless oil.  $^1\text{H}$  NMR (500 MHz,  $\text{CDCl}_3$ )  $\delta$  1.04 (t,  $J = 7.2$  Hz, 3H), 1.27 (t,  $J = 7.2$  Hz, 3H), 3.80 (d,  $J = 10.6$  Hz, 1H), 3.94–4.04 (m, 2H), 4.16–4.27 (m, 3H), 5.65 (dq,  $J_{\text{HH}} = 15.6$  Hz,  $J_{\text{HF}} = 6.2$  Hz,  $J_{\text{HH}} = 1.2$  Hz, 1H), 6.54 (ddq,  $J_{\text{HH}} = 15.6$ , 8.2 Hz,  $J_{\text{HF}} = 2.1$  Hz, 1H), 6.99–7.07 (m, 2H), 7.17–7.25 (m, 2H).  $^{13}\text{C}$  NMR (125 MHz,  $\text{CDCl}_3$ )  $\delta$  13.7, 13.9, 46.5, 56.8, 61.7, 62.0, 115.8 (d,  $J_{\text{CF}} = 21.6$  Hz), 120.4 (q,  $J_{\text{CF}} = 33.6$  Hz), 122.6 (q,  $J_{\text{CF}} = 269.5$  Hz), 129.8 (d,  $J_{\text{CF}} = 8.4$  Hz), 133.6 (d,  $J_{\text{CF}} = 3.6$  Hz), 139.2 (q,  $J_{\text{CF}} = 6.0$  Hz), 162.1 (d,  $J_{\text{CF}} = 247.1$  Hz), 166.7, 167.1.  $^{19}\text{F}$  NMR (470 MHz,  $\text{CDCl}_3$ )  $\delta$  47.6 (tt,  $J = 8.5$ , 5.2 Hz), 97.5 (dt,  $J = 6.2$ , 1.9 Hz). IR (neat) 2986, 2942, 2909, 1734, 1680, 1605, 1511  $\text{cm}^{-1}$ . HRMS (ESI):  $m/z$ : calcd for  $\text{C}_{17}\text{H}_{18}\text{F}_4\text{NaO}_4$ ,  $[\text{M}+\text{Na}]^+$  385.1039, found 385.1022.  $[\alpha]_{\text{D}}^{26} +12.9$  ( $c$  5.96,  $\text{CHCl}_3$ ) (93% ee). Enantiomeric purity was determined by HPLC using a Daicel CHIRALPAK AD-H

(hexane/2-propanol = 19/1, flow: 1.0 mL/min, 215 nm, 35 °C,  $t_R$  9.33 min (major);  $t_R$  13.23 min (minor)).

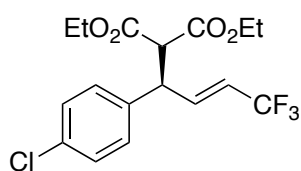

**(R)-Diethyl 2-(1-(4-chlorophenyl)-4,4,4-trifluorobut-2-en-1-yl)malonate ((R)-5da):** Colorless oil.  $^1\text{H}$  NMR (500 MHz,  $\text{CDCl}_3$ )  $\delta$  1.05 (t,  $J = 7.2$  Hz, 3H), 1.27 (t,  $J = 7.2$  Hz, 3H), 3.79 (d,  $J = 10.9$  Hz, 1H), 3.97–4.03 (m, 2H), 4.14–4.25 (m, 3H), 5.65 (dq,  $J_{\text{HH}} = 15.8$  Hz,  $J_{\text{HF}} = 6.3$  Hz,  $J_{\text{HH}} = 1.1$  Hz, 1H), 6.53 (ddq,  $J_{\text{HH}} = 15.8$ , 8.2 Hz,  $J_{\text{HF}} = 2.1$  Hz 1H), 7.17 (d,  $J = 8.6$  Hz, 2H), 7.31 (d,  $J = 8.6$  Hz, 2H).  $^{13}\text{C}$  NMR (125 MHz,  $\text{CDCl}_3$ )  $\delta$  13.7, 13.9, 46.6, 56.6, 61.8, 62.0, 120.6 (q,  $J_{\text{CF}} = 34.0$  Hz), 122.5 (q,  $J_{\text{CF}} = 269.5$  Hz), 129.1, 129.5, 133.7, 136.3, 138.9 (q,  $J_{\text{CF}} = 6.4$  Hz), 166.6, 167.0.  $^{19}\text{F}$  NMR (470 MHz,  $\text{CDCl}_3$ )  $\delta$  97.4 (dt,  $J = 6.2$ , 1.8 Hz). IR (neat) 2986, 2941, 2908, 1734, 1679, 1596, 1493, 1370  $\text{cm}^{-1}$ . HRMS (ESI):  $m/z$ : calcd for  $\text{C}_{17}\text{H}_{18}\text{ClF}_3\text{NaO}_4$ ,  $[\text{M}+\text{Na}]^+$  401.0743, found 401.0735.  $[\alpha]_{\text{D}}^{26} +16.0$  ( $c$  6.60,  $\text{CHCl}_3$ ) (94% ee). Enantiomeric purity was determined by HPLC using a Daicel CHIRALPAK AD-H (hexane/2-propanol = 19/1, flow: 1.0 mL/min, 215 nm, 35 °C,  $t_R$  10.8 min (major);  $t_R$  13.7 min (minor)).

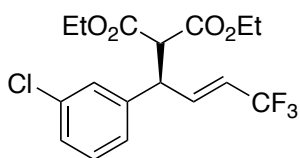

**(R)-Diethyl 2-(1-(3-chlorophenyl)-4,4,4-trifluorobut-2-en-1-yl)malonate ((R)-5ea):** Colorless oil.  $^1\text{H}$  NMR (500 MHz,  $\text{CDCl}_3$ )  $\delta$  1.05 (t,  $J = 7.2$  Hz, 3H), 1.27 (t,  $J = 7.2$  Hz, 3H), 3.82 (d,  $J = 10.9$  Hz, 1H), 4.01 (qd,  $J = 14.2$ , 1.3 Hz, 2H), 4.16–4.27 (m, 3H), 5.68 (dq,  $J_{\text{HH}} = 15.8$  Hz,  $J_{\text{HF}} = 6.3$  Hz,  $J_{\text{HH}} = 1.1$  Hz, 1H), 6.53 (ddq,  $J_{\text{HH}} = 15.8$ , 8.3 Hz,  $J_{\text{HF}} = 2.1$  Hz, 1H), 7.13 (dt,  $J = 6.8$ , 1.9 Hz, 1H), 7.23–7.30 (m, 3H).  $^{13}\text{C}$  NMR (125 MHz,  $\text{CDCl}_3$ )  $\delta$  13.7, 13.9, 46.9, 56.5, 61.8, 62.0, 120.7 (q,  $J_{\text{CF}} = 34.0$  Hz), 122.5 (q,  $J_{\text{CF}} = 269.5$  Hz), 126.3, 128.0, 128.3, 130.2, 134.7, 138.7 (q,  $J_{\text{CF}} = 6.8$  Hz), 139.9, 166.5, 167.0.  $^{19}\text{F}$  NMR (470 MHz,  $\text{CDCl}_3$ )  $\delta$  97.4 (dt,  $J = 4.0$ , 1.9 Hz). IR (neat) 2985, 2940, 2907, 1733, 1679, 1596, 1574, 1477  $\text{cm}^{-1}$ . HR-MS (ESI):  $m/z$ : calcd for  $\text{C}_{17}\text{H}_{18}\text{ClF}_3\text{NaO}_4$ ,  $[\text{M}+\text{Na}]^+$  401.0743, found 401.0734.  $[\alpha]_{\text{D}}^{25} +14.0$  ( $c$  6.13,  $\text{CHCl}_3$ ) (92% ee). Enantiomeric purity was determined by HPLC using a Daicel

CHIRALPAK AD-H (hexane/2-propanol = 19/1, flow: 1.0 mL/min, 215 nm, 35 °C,  $t_R$  7.97 min (major);  $t_R$  9.02 min (minor)).

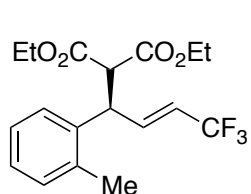

**(R)-Diethyl 2-(4,4,4-trifluoro-1-(o-tolyl)but-2-en-1-yl)malonate ((R)-5fa):** Colorless oil.  $^1\text{H}$  NMR (500 MHz,  $\text{CDCl}_3$ )  $\delta$  0.97 (t,  $J = 7.2$  Hz, 3H), 1.29 (t,  $J = 7.2$  Hz, 3H), 2.40 (s, 3H), 3.88–4.00 (m, 3H), 4.19–4.29 (m, 2H), 4.49 (dd,  $J = 11.5, 7.8$  Hz, 1H), 5.57 (dq,  $J_{\text{HH}} = 15.8$  Hz,  $J_{\text{HF}} = 6.3$  Hz,  $J_{\text{HH}} = 1.4$  Hz, 1H), 6.46 (ddq,  $J_{\text{HH}} = 15.8, 7.8$  Hz,  $J_{\text{HF}} = 2.1$  Hz, 1H), 7.12–7.22 (m, 4H).  $^{13}\text{C}$  NMR (125 MHz,  $\text{CDCl}_3$ )  $\delta$  13.5, 13.9, 19.6, 42.5, 56.2, 61.5, 61.9, 119.9 (q,  $J_{\text{CF}} = 33.6$  Hz), 122.6 (q,  $J_{\text{CF}} = 269.5$  Hz), 126.4, 126.5, 127.4, 130.9, 135.9, 136.6, 139.3 (q,  $J_{\text{CF}} = 6.4$  Hz), 166.7, 167.5.  $^{19}\text{F}$  NMR (470 MHz,  $\text{CDCl}_3$ )  $\delta$  97.6 (dt,  $J = 4.2, 2.1$  Hz). IR (neat) 2984, 2940, 2908, 2876, 1736, 1677, 1493, 1466, 1447  $\text{cm}^{-1}$ . HRMS (ESI):  $m/z$ : calcd for  $\text{C}_{18}\text{H}_{22}\text{F}_3\text{O}_4$ ,  $[\text{M}+\text{H}]^+$  359.1470, found 359.1465.  $[\alpha]_{\text{D}}^{25} +43.4$  ( $c$  2.84,  $\text{CHCl}_3$ ) (83% ee). Enantiomeric purity was determined by HPLC using a Daicel CHIRALPAK AD-H (hexane/2-propanol = 19/1, flow: 1.0 mL/min, 215 nm, 35 °C,  $t_R$  4.78 min (major);  $t_R$  7.06 min (minor)).

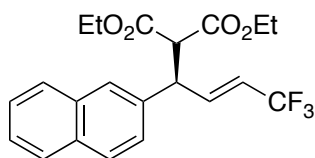

**(R)-Diethyl 2-(4,4,4-trifluoro-1-(naphthalen-2-yl)but-2-en-1-yl)malonate ((R)-5ga):** Colorless oil.  $^1\text{H}$  NMR (500 MHz,  $\text{CDCl}_3$ )  $\delta$  0.94 (t,  $J = 7.2$  Hz, 3H), 1.29 (t,  $J = 7.2$  Hz, 3H), 3.88–4.01 (m, 3H), 4.25 (qd,  $J = 7.2, 0.9$  Hz, 2H), 4.40 (dd,  $J = 10.9, 8.2$  Hz, 1H), 5.71 (dq,  $J_{\text{HH}} = 15.8$  Hz,  $J_{\text{HF}} = 6.3$  Hz,  $J_{\text{HH}} = 1.1$  Hz, 1H), 6.67 (ddq,  $J_{\text{HH}} = 15.8, 8.2$  Hz,  $J_{\text{HF}} = 2.1$  Hz, 1H), 7.35 (dd,  $J = 8.4, 1.9$  Hz, 1H), 7.44–7.50 (m, 2H), 7.70 (d,  $J = 1.7$  Hz, 1H), 7.76–7.85 (m, 3H).  $^{13}\text{C}$  NMR (125 MHz,  $\text{CDCl}_3$ )  $\delta$  13.6, 14.0, 47.4, 56.7, 61.6, 62.0, 120.4 (q,  $J_{\text{CF}} = 34.0$  Hz), 122.6 (q,  $J_{\text{CF}} = 269.9$  Hz), 125.7, 126.2, 126.4, 127.1, 127.6, 127.8, 128.7, 132.7, 133.3, 135.2, 139.4 (q,  $J_{\text{CF}} = 6.8$  Hz), 166.8, 167.3.  $^{19}\text{F}$  NMR (470 MHz,  $\text{CDCl}_3$ )  $\delta$  97.6 (dt,  $J = 4.0, 2.3$  Hz). IR (neat) 3058, 2984, 2940, 2907, 1733, 1678, 1600, 1508, 1465, 1370  $\text{cm}^{-1}$ . H-MS (ESI):  $m/z$ : calcd for  $\text{C}_{21}\text{H}_{21}\text{F}_3\text{NaO}_4$ ,  $[\text{M}+\text{Na}]^+$  417.1290, found 417.1280.  $[\alpha]_{\text{D}}^{26} +22.1$  ( $c$  6.75,  $\text{CHCl}_3$ ) (82% ee). Enantiomeric purity was determined by HPLC using

a Daicel CHIRALCEL OJ-H (hexane/2-propanol = 19/1, flow: 1.0 mL/min, 254 nm, 35 °C,  $t_R$  7.81 min (major);  $t_R$  9.01 min (minor)).

### Determination of the absolute configuration of the alkylated product **5ab** and **3ab**:

The absolute configuration of **5ab** was assigned to be *R* by the X-ray crystallography of its brominated derivative (*S*)-**S3** (Scheme S1), and the absolute configuration of other alkylated products were estimated by comparison with (*R*)-**5ab**. Furthermore, we also confirmed that the methylation of (*R*)-**5ab** by MeI and NaH in MeOH at reflux temperature provided (*S*)-**3ab** in 83% yield.

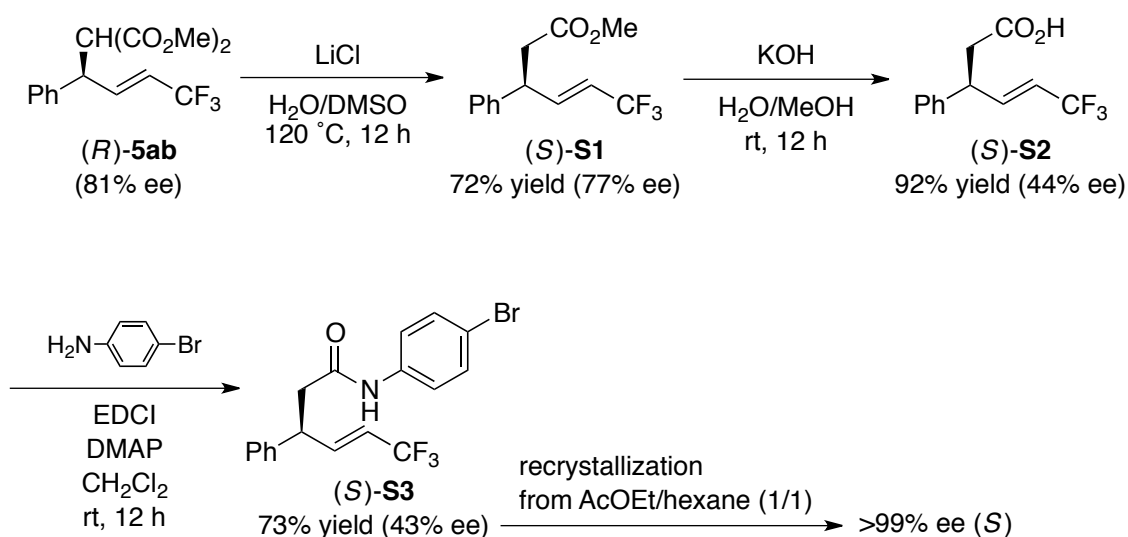

**Scheme S1.**

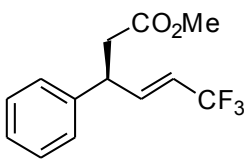
**(*R*)-Methyl 6,6,6-trifluoro-3-phenylhex-4-enoate ((*S*)-**S1**):**  
 Isolated yield: 72%. Colorless oil.  $^1\text{H}$  NMR (500 MHz,  $\text{CDCl}_3$ ):  $\delta$  2.78 (d,  $J = 7.5$  Hz, 2H), 3.64 (s, 3H), 3.98 (dt,  $J = 7.0, 7.5$ ), 5.59 (dq,  $J_{\text{HH}} = 16.0$  Hz,  $J_{\text{HF}} = 6.5$  Hz, 1H), 6.54 (dd,  $J_{\text{HH}} = 16.0, 6.5$  Hz, 1H), 7.19 (d,  $J = 7.5$  Hz, 2H), 7.28 (d,  $J = 7.0$  Hz, 1H), 7.34 (t,  $J = 7.5$  Hz, 2H).  $^{13}\text{C}$  NMR (125 MHz,  $\text{CDCl}_3$ ):  $\delta$  39.4, 43.5, 51.8, 119.0 (q,  $J_{\text{CF}} = 33.4$ ), 122.9 (q,  $J_{\text{CF}} = 268$  Hz), 127.5, 129.0, 140.0, 141.7 (q,  $J_{\text{CF}} = 6.0$  Hz), 171.4.  $^{19}\text{F}$  NMR ( $\text{CDCl}_3$ ):  $\delta$  97.80 (d,  $J = 7.5$  Hz). IR (neat) 3033, 2955, 1740, 1678, 1439  $\text{cm}^{-1}$ . HRMS (ESI):  $m/z$ : Calcd for  $\text{C}_{13}\text{H}_{13}\text{F}_3\text{O}_2^+$  [ $\text{M}+\text{H}$ ] $^+$  259.0940, found 259.0933.  $[\alpha]_{\text{D}}^{22}$



-12.2 (*c* 0.66, CHCl<sub>3</sub>) (77% ee). Enantiomeric purity was determined by HPLC using a Daicel CHIRALPAK AD-H (hexane/2-propanol = 49/1, flow: 0.7 mL/min, 215 nm, 35 °C, *t*<sub>R</sub> 7.77 min (minor); *t*<sub>R</sub> 8.38 (major)).

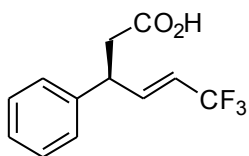

**(*R*)-6,6,6-trifluoro-3-phenylhex-4-enoic acid ((*S*)-S2):** Isolated yield: 92%. White solid. Mp 85–87 °C. <sup>1</sup>H NMR (500 MHz, CDCl<sub>3</sub>): δ 2.83 (d, *J* = 7.7 Hz, 2H), 3.96 (dt, *J* = 6.5, 7.7 Hz, 1H), 5.60 (dq, *J*<sub>HH</sub> = 16.0 Hz, *J*<sub>HF</sub> = 6.5 Hz, 1H), 6.54 (dd, *J*<sub>HH</sub> = 16.0, 6.5 Hz, 1H), 7.19 (d, *J* = 7.5 Hz, 2H), 7.29 (d, *J* = 7.5 Hz, 1H), 7.35 (t, *J* = 7.5 Hz, 2H). <sup>13</sup>C NMR (125 MHz, CDCl<sub>3</sub>): δ 39.2, 43.1, 119.3 (q, *J*<sub>CF</sub> = 33.4 Hz), 122.9 (q, *J*<sub>CF</sub> = 268 Hz), 127.6, 127.6, 129.1, 139.7, 141.5 (q, *J*<sub>CF</sub> = 6.4 Hz), 177.0. <sup>19</sup>F NMR (470 MHz, CDCl<sub>3</sub>): δ 97.73 (d, *J* = 7.5 Hz). IR (neat) 3033, 1723, 1284 cm<sup>-1</sup>. HRMS (ESI): *m/z*: Calcd for C<sub>12</sub>H<sub>11</sub>F<sub>3</sub>O<sub>2</sub><sup>+</sup> [M+Na]<sup>+</sup> 267.0603, found 259.0608. [*α*]<sub>D</sub><sup>28</sup> +15.0 (*c* 0.35, CHCl<sub>3</sub>) (44% ee). Enantiomeric purity was determined by HPLC using a Daicel CHIRALPAK AD-H (hexane/2-propanol = 9/1, flow: 0.7 mL/min, 215 nm, 35 °C, *t*<sub>R</sub> 9.76 min (minor); *t*<sub>R</sub> 11.39 min (major)).

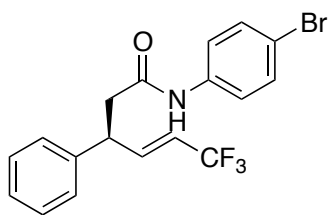

**(*R*)-*N*-(4-bromophenyl)-6,6,6-trifluoro-3-phenylhex-4-enamide ((*S*)-3S):** Isolated yield 73%. White solid. Mp 160–164 °C. <sup>1</sup>H NMR (500 MHz, CDCl<sub>3</sub>): δ 2.73 (m, 2H), 4.09 (dt, *J* = 6.0, 7.5 Hz, 1H), 5.62 (dq, *J*<sub>HH</sub> = 15.5 Hz, *J*<sub>HF</sub> = 6.0 Hz, 1H), 6.60 (dd, *J*<sub>HH</sub> = 15.5, 6.0 Hz, 1H), 7.08 (br, 1H), 7.11-7.22 (m, 4H), 7.28-7.29 (m, 1H), 7.35-7.37 (m, 4H). <sup>13</sup>C NMR (125 MHz, CDCl<sub>3</sub>): δ 43.1, 43.7, 117.3, 119.3 (q, *J*<sub>CF</sub> = 34.2 Hz), 121.7, 122.9 (q, *J* = 276 Hz), 127.6, 127.7, 129.2, 132.0, 136.3, 140.0, 141.7 (q, *J*<sub>CF</sub> = 6.0 Hz), 168.2. <sup>19</sup>F NMR (470 MHz, CDCl<sub>3</sub>): δ 97.84 (d, *J* = 5.2 Hz). IR (neat) 3033, 1722, 1284 cm<sup>-1</sup>. HRMS (ESI): *m/z*: Calcd for C<sub>18</sub>H<sub>15</sub>BrF<sub>3</sub>NO<sup>+</sup> [M+H]<sup>+</sup> 398.0362, found 398.0334. [*α*]<sub>D</sub><sup>27</sup> -36.0 (*c* 0.66, CHCl<sub>3</sub>) (99% ee). Enantiomeric purity was determined by HPLC using a Daicel CHIRALPAK AD-H (hexane/2-propanol = 19/1, flow: 1.0 mL/min, 215 nm, 35 °C, *t*<sub>R</sub> 49.31 min (minor); *t*<sub>R</sub> 55.39 min (major)). Recrystallization from AcOEt/hexane (1/1) at room temperature gave an enantiomerically pure **S3**, which is a

suitable for X-ray study, and the absolute configuration was determined to be *S*.

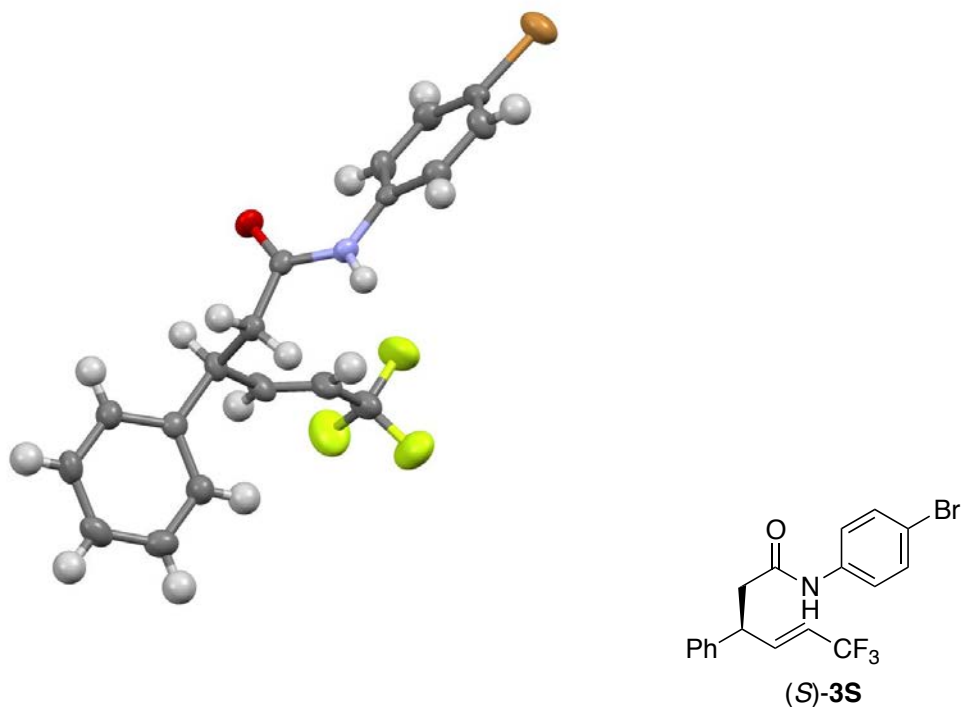

**Figure S1.** X-ray crystal structure of (*S*)-3S. CCDC 1451796 contains the supplementary crystallographic data for the compound (S)-3S. This data can be obtained free of charge from the Cambridge Crystallographic Data Centre via [www.ccdc.cam.ac.uk/data\\_request/cif](http://www.ccdc.cam.ac.uk/data_request/cif).

## References

- (1) White, D. A.; Doyle, J. R.; Lewis, H. *Inorg. Synth.* **1972**, *13*, 55–65.
- (2) Prakash, G. K. S.; Mandal, M.; Schweizer, S.; Petasis, N. A.; Olah, G. A. *Org. Lett.* **2000**, *2*, 3173–3176.
- (3) Kitazume, T.; Lin, J. T.; Yamazaki, T.; Takeda, M. *J. Fluorine Chem.* **1989**, *43*, 177–187.
- (4) Gemal, A. L.; Luche, J. L. *J. Am. Chem. Soc.* **1981**, *103*, 5454–5459.

- (5) (a) Yamazaki, T.; Mizutani, K.; Kitazume, T. *J. Org. Chem.* **1995**, *60*, 6046–6056.  
(b) Yamazaki, T.; Kawasaki-Takasuka, T.; Furuta, A.; Sakamoto, S. *Tetrahedron* **2009**, *65*, 5945–5948.
- (6) (a) Okano, T.; Matsubara, M.; Kusukawa, T.; Fujita, M. *J. Organomet. Chem.* **2003**, *676*, 43–48. (b) Konno, T.; Yakehana, T.; Ishihara, T.; Yamanaka, H. *Org. Biomol. Chem.* **2004**, *2*, 93–98.

Copies of  $^1\text{H}$ ,  $^{13}\text{C}$ , and  $^{19}\text{F}$  NMR spectra

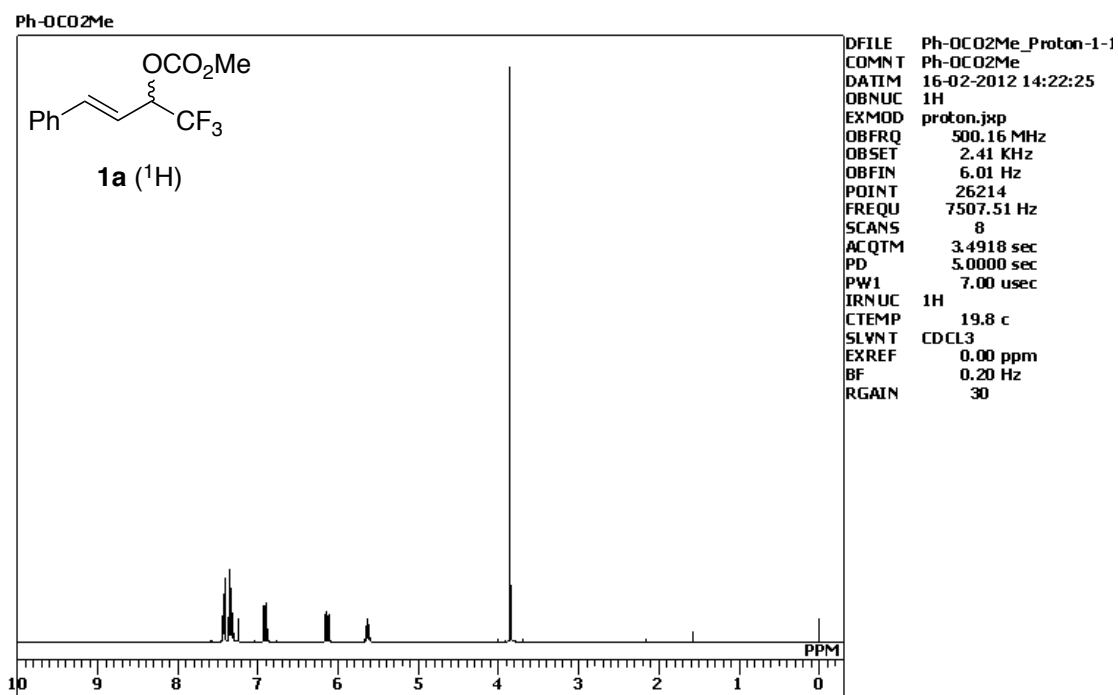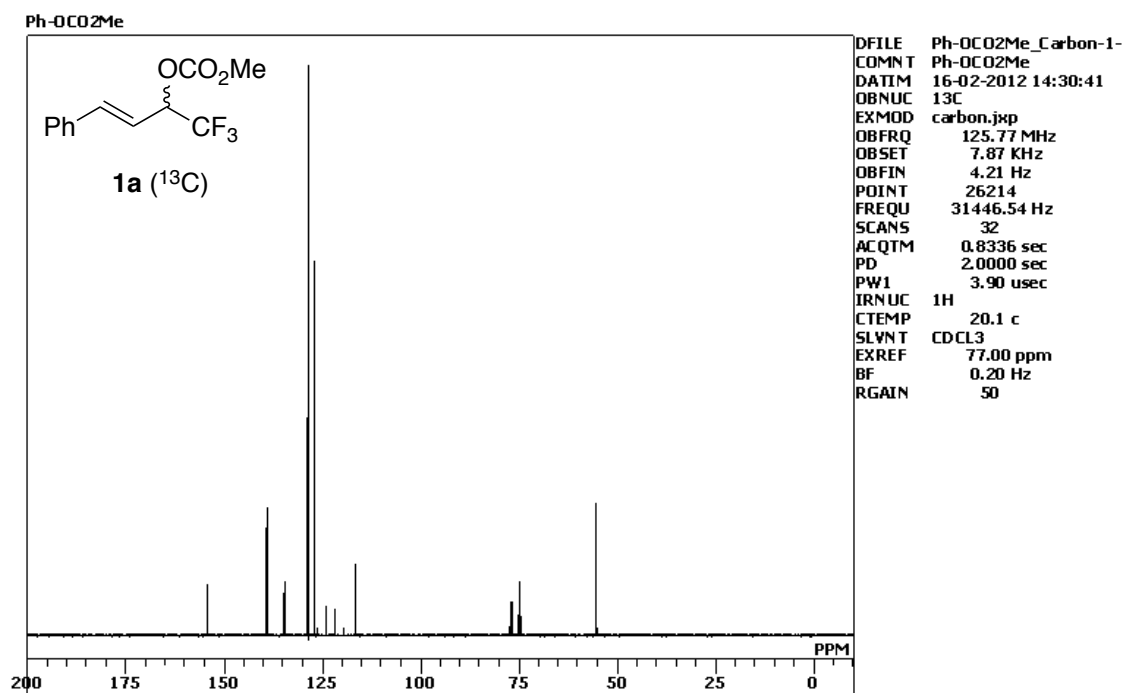

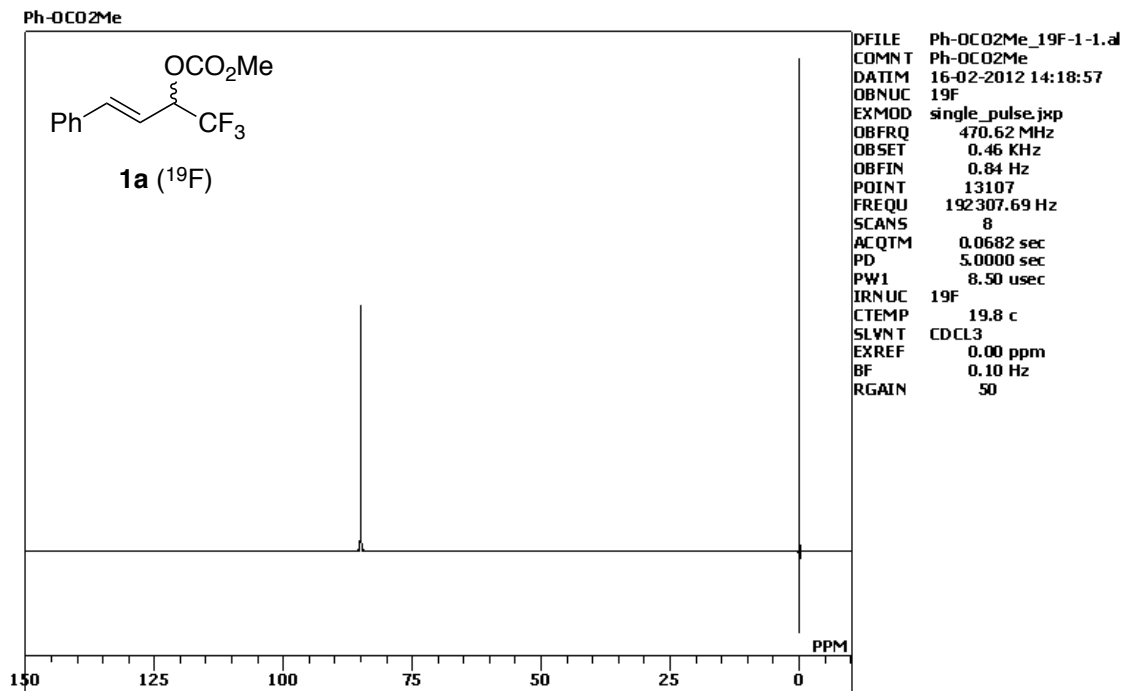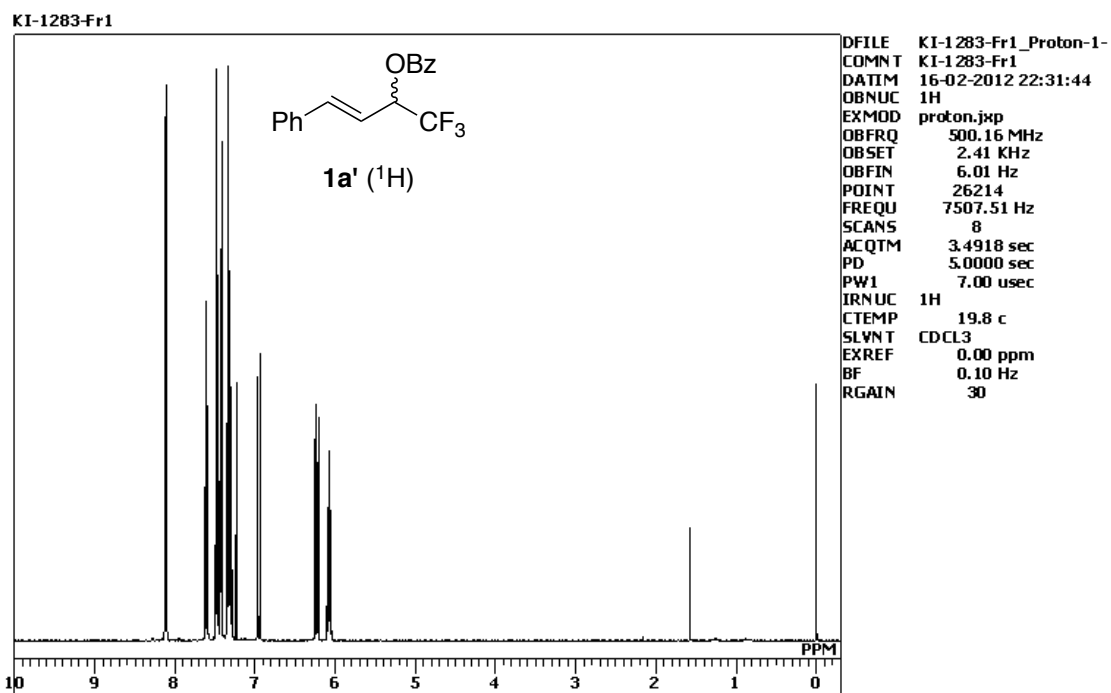

Ph-OBz

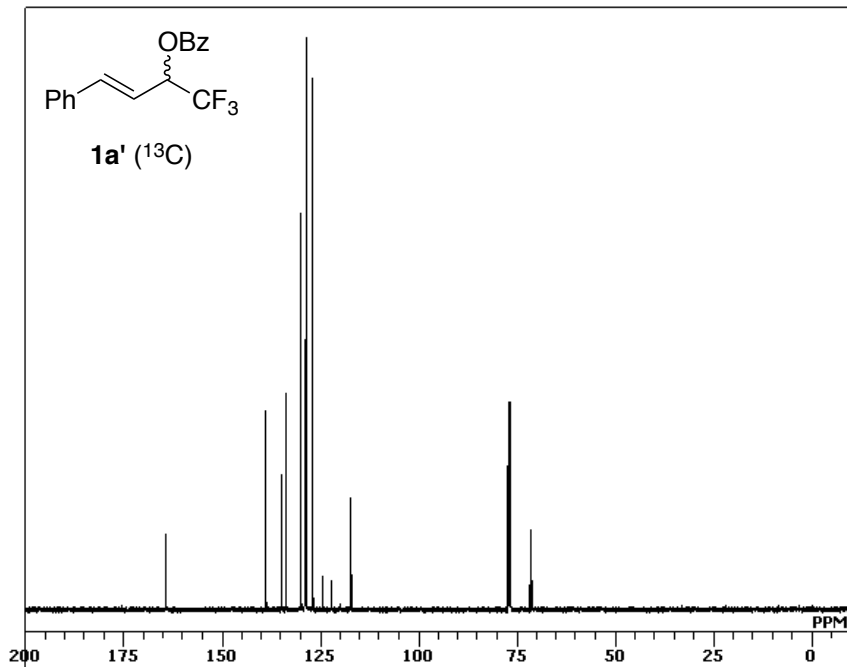

DFILE Ph-OBz\_Carbon-1-1.als  
COMNT Ph-OBz  
DATIM 16-02-2012 15:10:57  
OBNUC 13C  
EXMOD carbon.jxp  
OBFREQ 125.77 MHz  
OBSET 7.87 KHz  
OBFIN 4.21 Hz  
POINT 26214  
FREQU 31446.54 Hz  
SCANS 137  
ACQTM 0.8336 sec  
PD 2.0000 sec  
PW1 3.90 usec  
IRNUC 1H  
CTEMP 20.4 c  
SLVNT CDCL3  
EXREF 77.00 ppm  
BF 1.00 Hz  
RGAIN 50

Ph-OBz

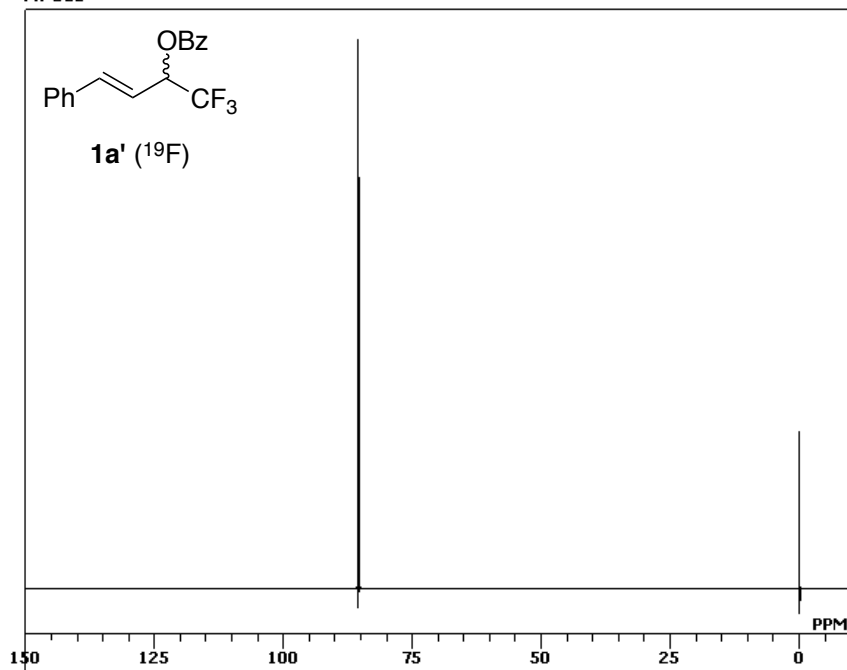

DFILE Ph-OBz\_19F-1-1.als  
COMNT Ph-OBz  
DATIM 16-02-2012 16:24:35  
OBNUC 19F  
EXMOD single\_pulse.jxp  
OBFREQ 470.62 MHz  
OBSET 0.46 KHz  
OBFIN 0.84 Hz  
POINT 13107  
FREQU 192307.69 Hz  
SCANS 8  
ACQTM 0.0682 sec  
PD 5.0000 sec  
PW1 8.50 usec  
IRNUC 19F  
CTEMP 19.9 c  
SLVNT CDCL3  
EXREF 0.00 ppm  
BF 1.00 Hz  
RGAIN 50

KI-1261-Fr1

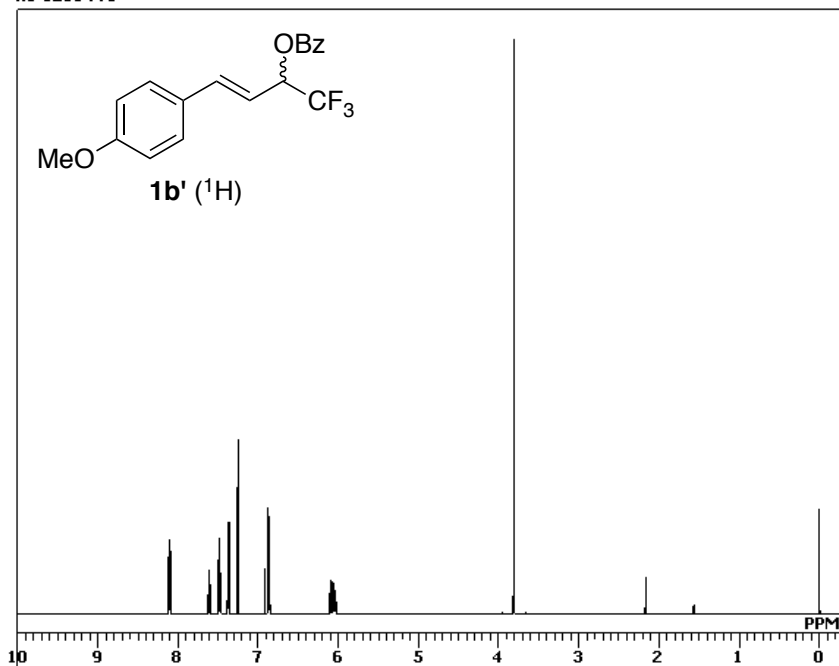

DFILE KI-1261-Fr1\_Proton-1.i  
COMNT KI-1261-Fr1  
DATIM 29-01-2012 23:08:34  
OBNUC 1H  
EXMOD proton.jxp  
OBFRQ 500.16 MHz  
OBSET 2.41 KHz  
OBFIN 6.01 Hz  
POINT 26214  
FREQU 7507.51 Hz  
SCANS 8  
ACQTM 3.4918 sec  
PD 5.0000 sec  
PW1 7.00 usec  
IRNUC 1H  
CTEMP 19.8 c  
SLVNT CDCL3  
EXREF 0.00 ppm  
BF 0.10 Hz  
RGAIN 34

KI-1261-Fr1

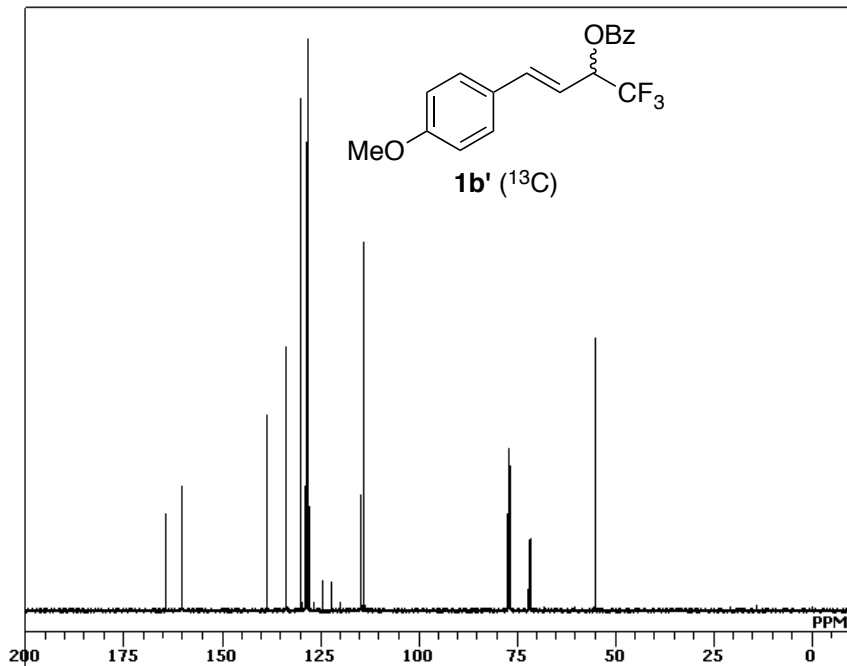

DFILE KI-1261-Fr1\_Carbon-1-  
COMNT KI-1261-Fr1  
DATIM 29-01-2012 23:21:04  
OBNUC 13C  
EXMOD carbon.jxp  
OBFRQ 125.77 MHz  
OBSET 7.87 KHz  
OBFIN 4.21 Hz  
POINT 26214  
FREQU 31446.54 Hz  
SCANS 128  
ACQTM 0.8336 sec  
PD 2.0000 sec  
PW1 3.90 usec  
IRNUC 1H  
CTEMP 20.5 c  
SLVNT CDCL3  
EXREF 77.00 ppm  
BF 1.00 Hz  
RGAIN 50

KI-1261-Fr1

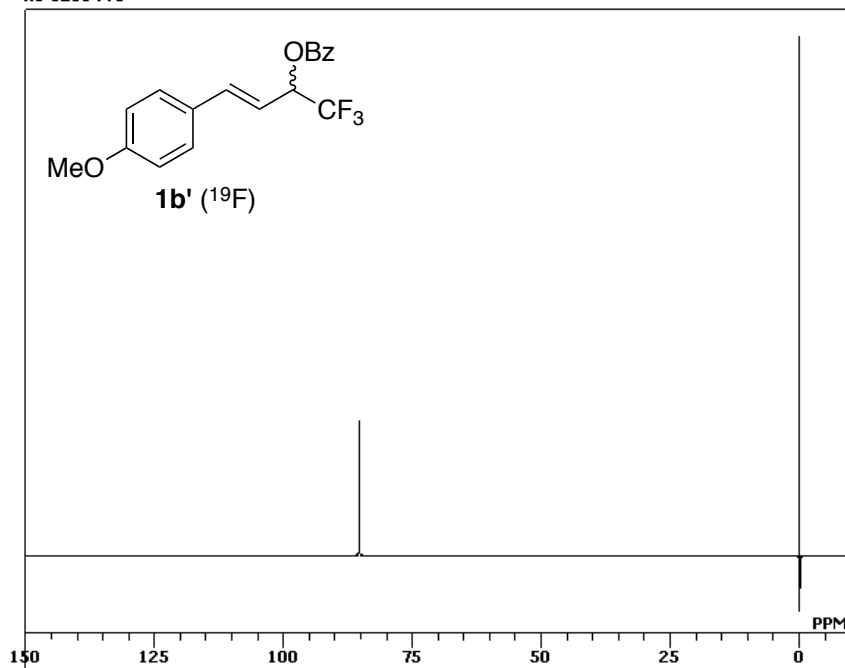

DFILE KI-1261-Fr1\_19F-1.als  
COMNT KI-1261-Fr1  
DATIM 29-01-2012 23:11:14  
OBNUC 19F  
EXMOD single\_pulse.jxp  
OBFRQ 470.62 MHz  
OBSET 0.46 KHz  
OBFIN 0.84 Hz  
POINT 13107  
FREQU 192307.69 Hz  
SCANS 8  
ACQTM 0.0682 sec  
PD 5.0000 sec  
PW1 8.50 usec  
IRNUC 19F  
CTEMP 19.8 c  
SLVNT CDCL3  
EXREF 0.00 ppm  
BF 1.00 Hz  
RGAIN 50

KI-683-Fr1

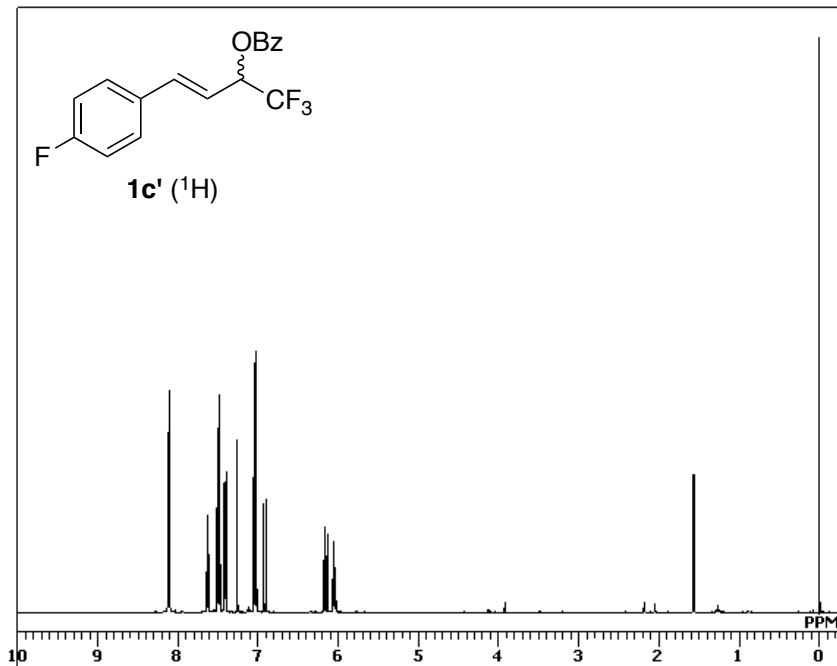

DFILE KI-683-Fr1\_Proton-1-1.  
COMNT KI-683-Fr1  
DATIM 06-03-2011 20:03:20  
OBNUC 1H  
EXMOD proton.jxp  
OBFRQ 500.16 MHz  
OBSET 2.41 KHz  
OBFIN 6.01 Hz  
POINT 16384  
FREQU 9384.38 Hz  
SCANS 8  
ACQTM 1.7459 sec  
PD 5.0000 sec  
PW1 6.80 usec  
IRNUC 1H  
CTEMP 17.1 c  
SLVNT CDCL3  
EXREF 0.00 ppm  
BF 0.10 Hz  
RGAIN 48



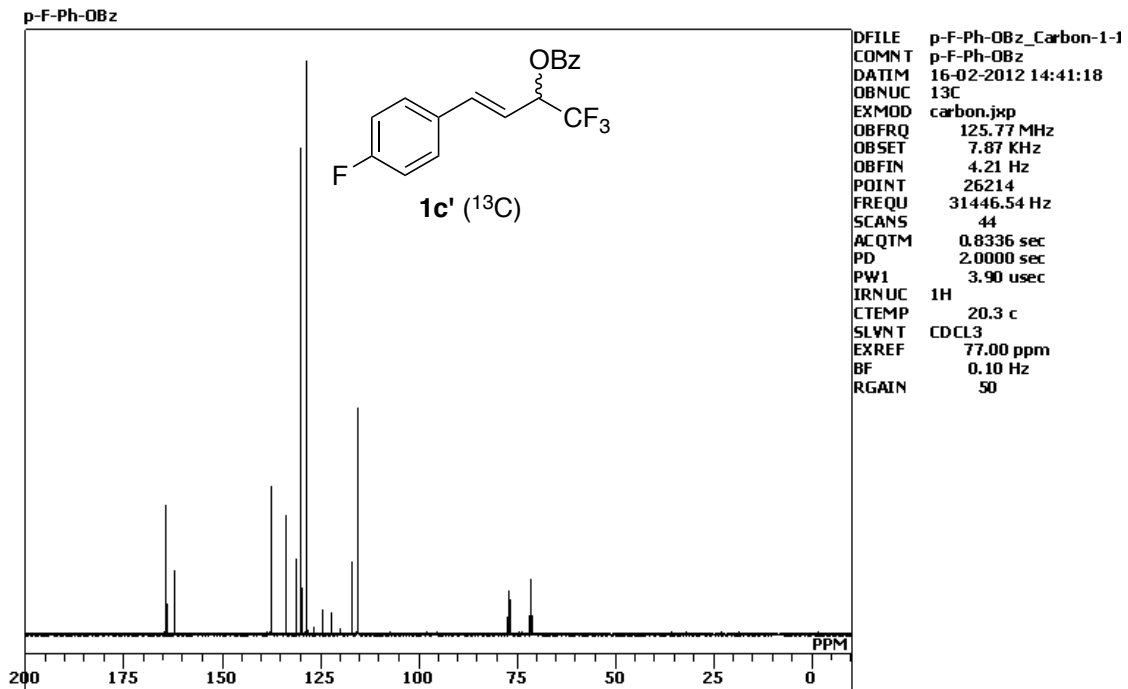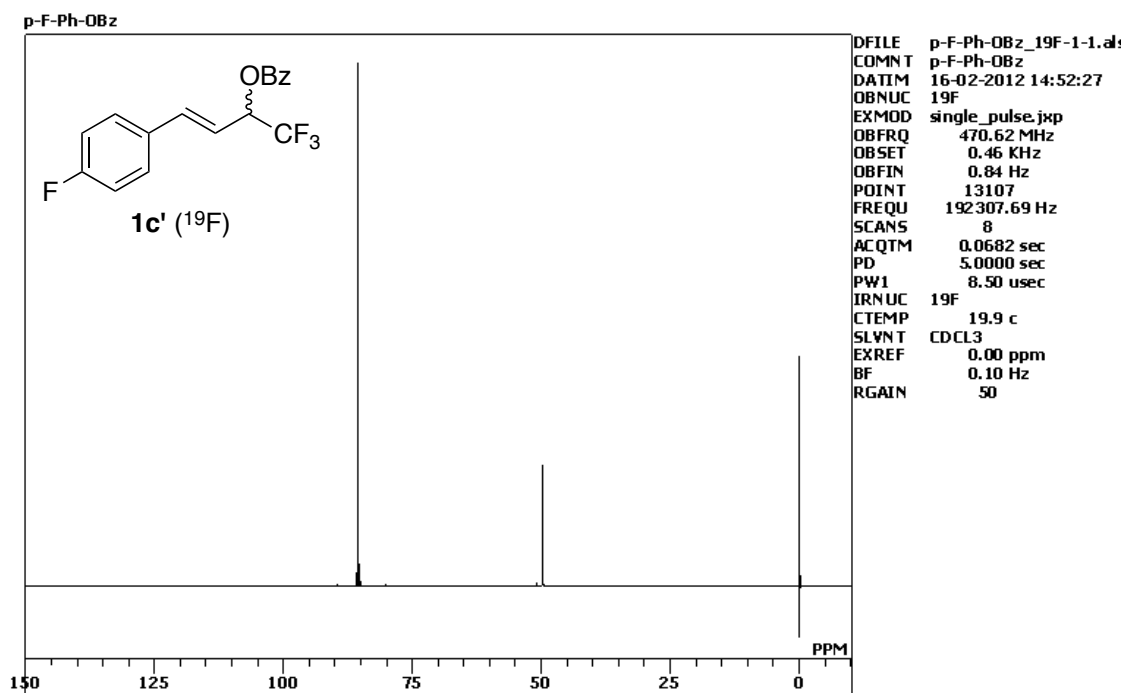

KI-1284-Fr1-Fr1

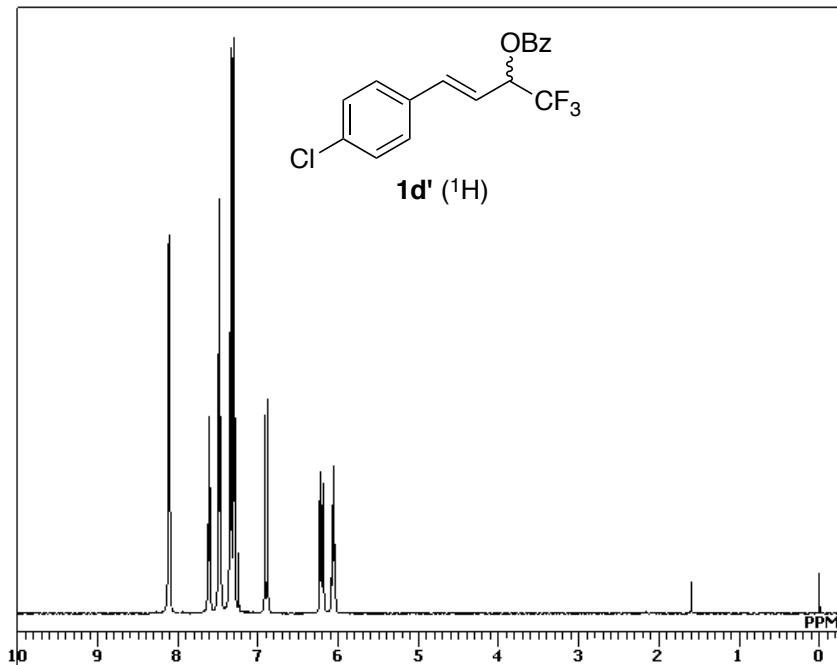

DFILE KI-1284-Fr1-Fr1\_Proton  
COMNT KI-1284-Fr1-Fr1  
DATIM 16-02-2012 22:39:60  
OBNUC 1H  
EXMOD proton.jxp  
OBFREQ 500.16 MHz  
OBSET 2.41 KHz  
OBFIN 6.01 Hz  
POINT 26214  
FREQU 7507.51 Hz  
SCANS 8  
ACQTM 3.4918 sec  
PD 5.0000 sec  
PW1 7.00 usec  
IRNUC 1H  
CTEMP 19.8 c  
SLVNT CDCL3  
EXREF 0.00 ppm  
BF 0.10 Hz  
RGAIN 30

KI-1284-Fr1-Fr1

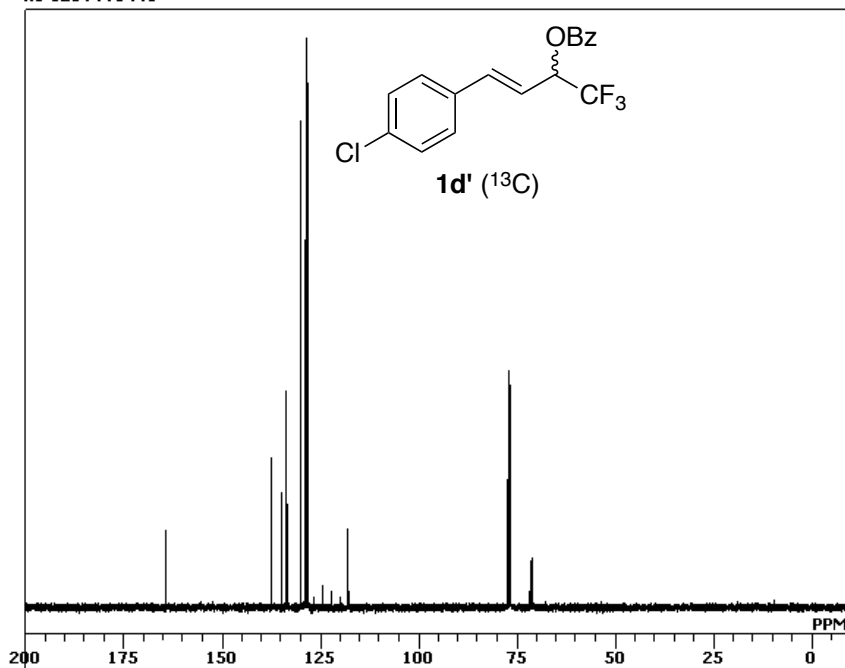

DFILE KI-1284-Fr1-Fr1\_Carbo  
COMNT KI-1284-Fr1-Fr1  
DATIM 16-02-2012 22:41:36  
OBNUC 13C  
EXMOD carbon.jxp  
OBFREQ 125.77 MHz  
OBSET 7.87 KHz  
OBFIN 4.21 Hz  
POINT 26214  
FREQU 31446.54 Hz  
SCANS 243  
ACQTM 0.8336 sec  
PD 2.0000 sec  
PW1 3.90 usec  
IRNUC 1H  
CTEMP 20.4 c  
SLVNT CDCL3  
EXREF 77.00 ppm  
BF 0.10 Hz  
RGAIN 50

KI-1284-Fr1

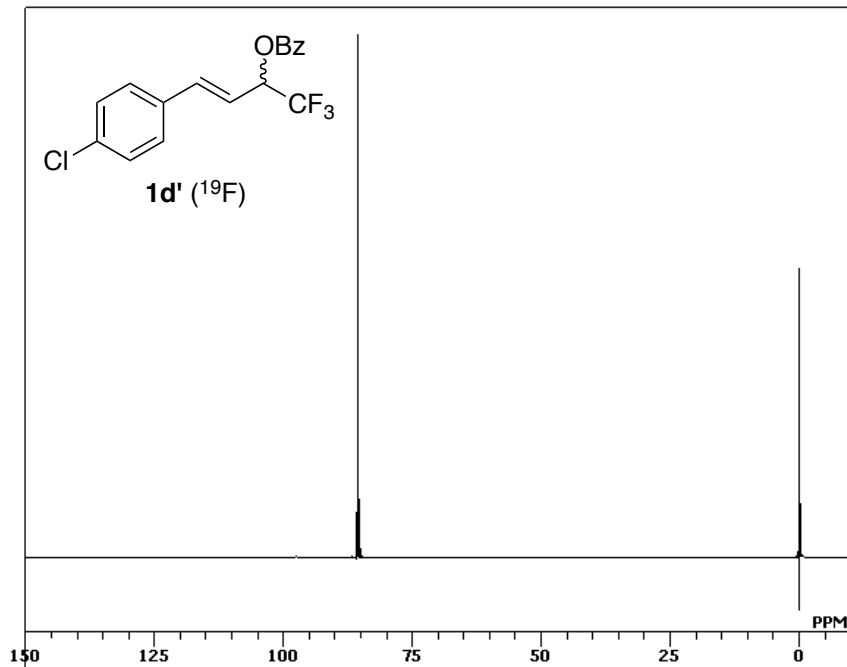

DFILE KI-1284-Fr1\_19F-1-1.al  
COMNT KI-1284-Fr1  
DATIM 16-02-2012 14:11:54  
OBNUC 19F  
EXMOD single\_pulse.jxp  
OBFRQ 470.62 MHz  
OBSET 0.46 KHz  
OBFIN 0.84 Hz  
POINT 13107  
FREQU 192307.69 Hz  
SCANS 8  
ACQTM 0.0682 sec  
PD 5.0000 sec  
PW1 8.50 usec  
IRNUC 19F  
CTEMP 19.8 c  
SLVNT CDCL3  
EXREF 0.00 ppm  
BF 0.10 Hz  
RGAIN 50

m-Cl-Ph-OBz

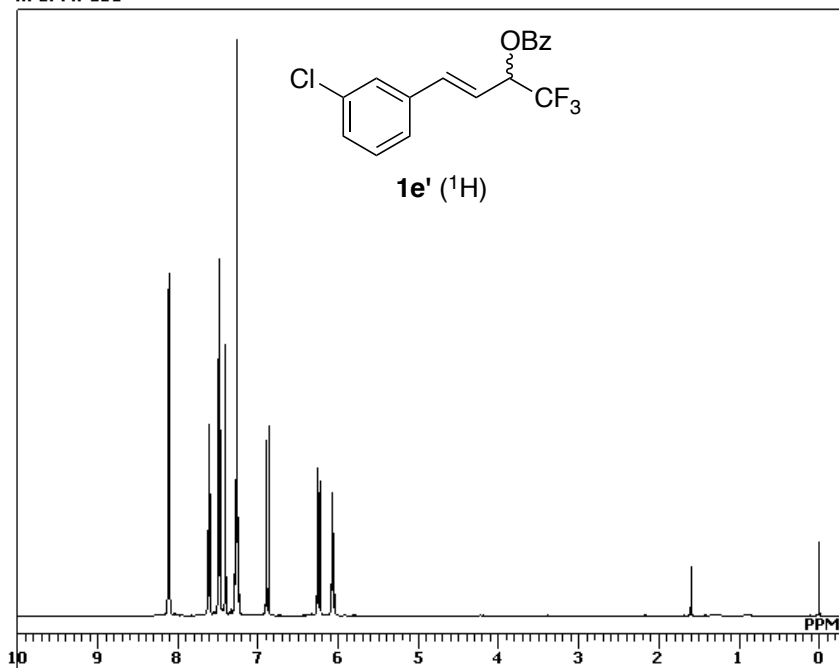

DFILE m-Cl-Ph-OBz-1H.als  
COMNT m-Cl-Ph-OBz  
DATIM 22-02-2012 21:13:33  
OBNUC 1H  
EXMOD proton.jxp  
OBFRQ 500.16 MHz  
OBSET 2.41 KHz  
OBFIN 6.01 Hz  
POINT 26214  
FREQU 7507.51 Hz  
SCANS 8  
ACQTM 3.4918 sec  
PD 5.0000 sec  
PW1 7.00 usec  
IRNUC 1H  
CTEMP 19.9 c  
SLVNT CDCL3  
EXREF 0.00 ppm  
BF 0.30 Hz  
RGAIN 30

m-Cl-Ph-OBz

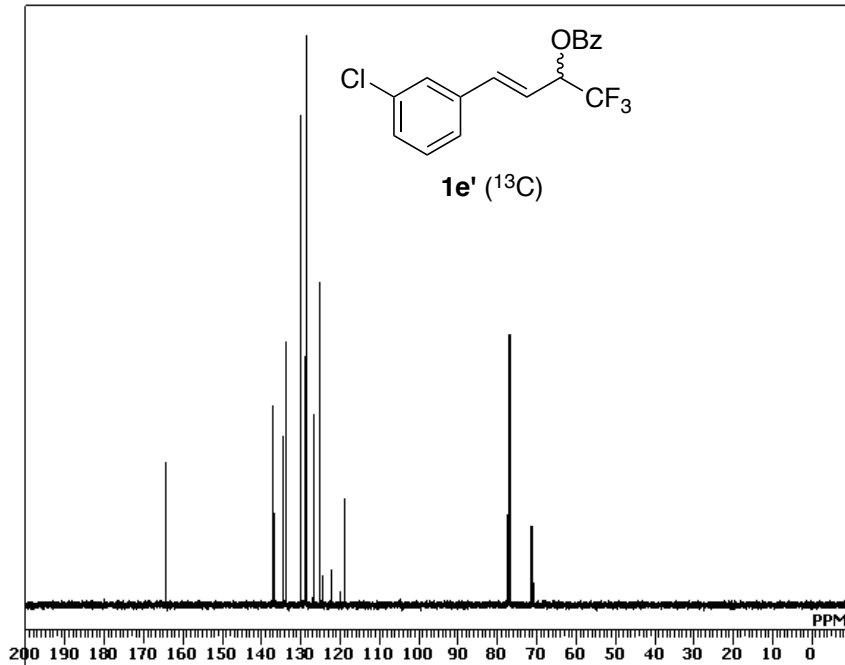

DFILE m-Cl-Ph-OBz-13C.als  
COMNT m-Cl-Ph-OBz  
DATIM 22-02-2012 21:15:06  
OBNUC 13C  
EXMOD carbon.jxp  
OBFRQ 125.77 MHz  
OBSET 7.87 KHz  
OBFIN 4.21 Hz  
POINT 26214  
FREQU 31446.54 Hz  
SCANS 200  
ACQTM 0.8336 sec  
PD 2.0000 sec  
PW1 3.90 usec  
IRNUC 1H  
CTEMP 20.6 c  
SLVNT CDCL3  
EXREF 77.00 ppm  
BF 0.30 Hz  
RGAIN 50

KI-1190

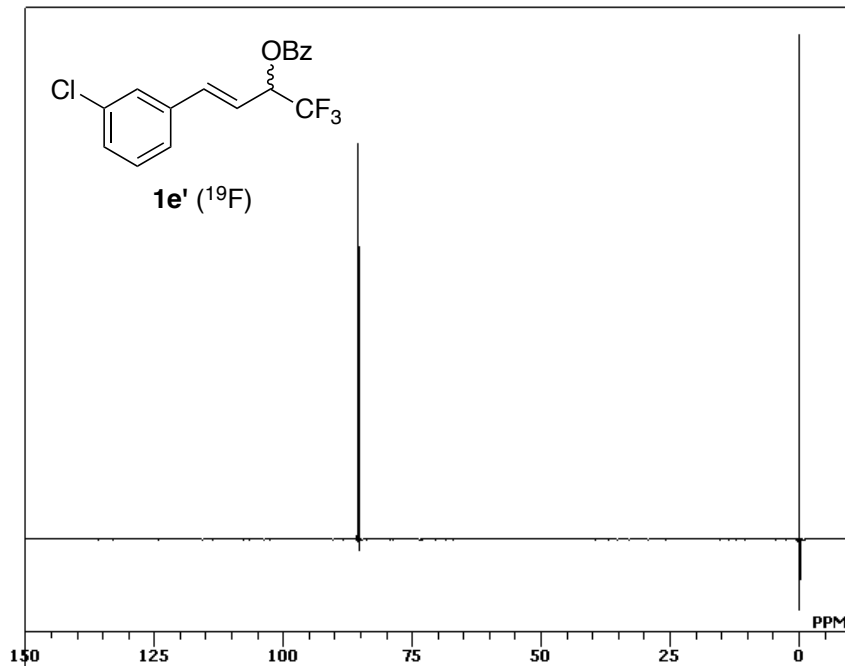

DFILE KI-1190\_19F-1-1.als  
COMNT KI-1190  
DATIM 29-12-2011 05:23:25  
OBNUC 19F  
EXMOD single\_pulse.jxp  
OBFRQ 470.62 MHz  
OBSET 0.46 KHz  
OBFIN 0.84 Hz  
POINT 13107  
FREQU 192307.69 Hz  
SCANS 8  
ACQTM 0.0682 sec  
PD 5.0000 sec  
PW1 7.00 usec  
IRNUC 19F  
CTEMP 19.7 c  
SLVNT CDCL3  
EXREF 0.00 ppm  
BF 0.20 Hz  
RGAIN 50

naphtyl-OBz

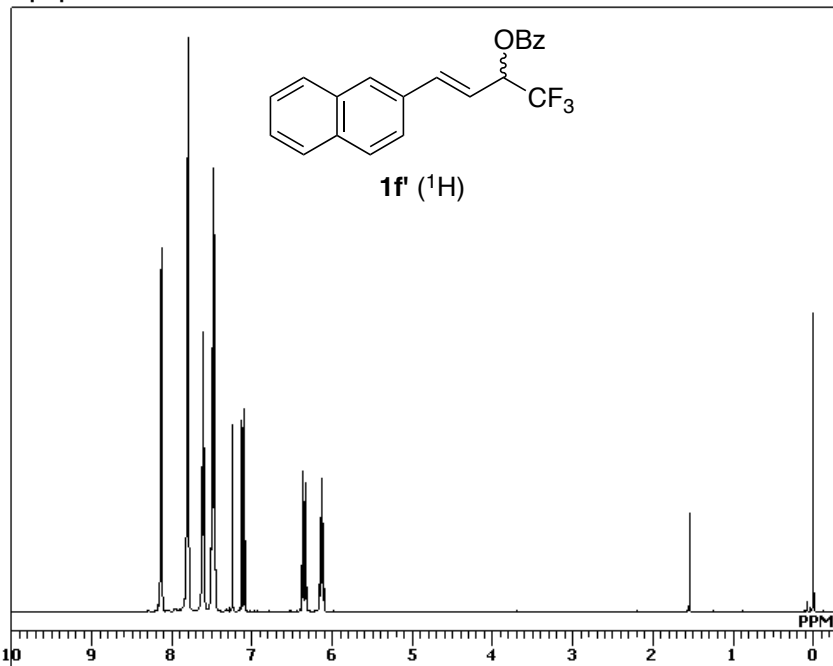

DFILE naphtyl-OBz\_Proton-1-  
COMNT naphtyl-OBz  
DATIM 16-11-2011 20:47:44  
OBNUC 1H  
EXMOD proton.jxp  
OBFRQ 500.16 MHz  
OBSET 2.41 KHz  
OBFIN 6.01 Hz  
POINT 26214  
FREQU 7507.51 Hz  
SCANS 8  
ACQTM 3.4918 sec  
PD 5.0000 sec  
PW1 6.80 usec  
IRNUC 1H  
CTEMP 23.4 c  
SLVNT CDCL3  
EXREF 0.00 ppm  
BF 1.00 Hz  
RGAIN 36

naphtyl-OBz

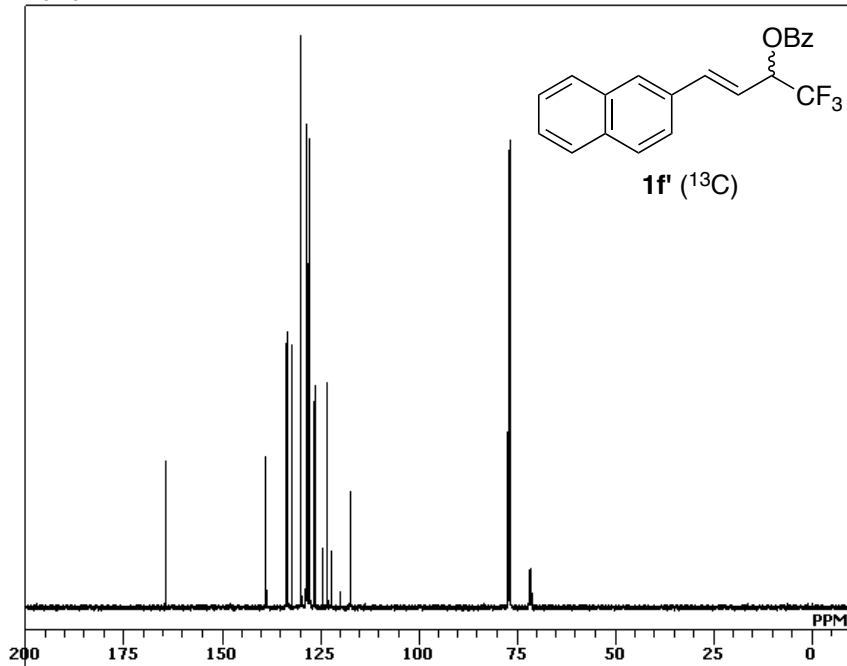

DFILE naphtyl-OBz\_Carbon-1-  
COMNT naphtyl-OBz  
DATIM 16-11-2011 20:55:48  
OBNUC 13C  
EXMOD carbon.jxp  
OBFRQ 125.77 MHz  
OBSET 7.87 KHz  
OBFIN 4.21 Hz  
POINT 26214  
FREQU 31446.54 Hz  
SCANS 776  
ACQTM 0.8336 sec  
PD 2.0000 sec  
PW1 3.90 usec  
IRNUC 1H  
CTEMP 23.7 c  
SLVNT CDCL3  
EXREF 77.00 ppm  
BF 1.00 Hz  
RGAIN 50

naphtyl-OBz

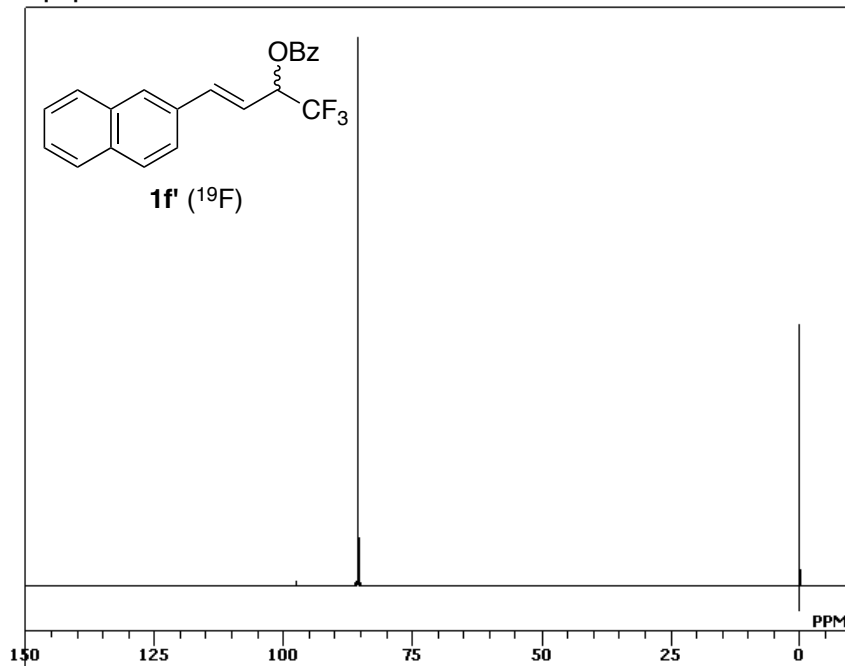

DFILE naphtyl-OBz\_19F-1-1.d  
COMNT naphtyl-OBz  
DATIM 16-11-2011 13:52:51  
OBNUC 19F  
EXMOD single\_pulse.jxp  
OBFRQ 470.62 MHz  
OBSET 0.46 KHz  
OBFIN 0.84 Hz  
POINT 26214  
FREQU 192307.69 Hz  
SCANS 8  
ACQTM 0.1363 sec  
PD 5.0000 sec  
PW1 7.00 usec  
IRNUC 19F  
CTEMP 23.5 c  
SLVNT CDCL3  
EXREF 0.00 ppm  
BF 1.00 Hz  
RGAIN 50

KI-1261-Fr1

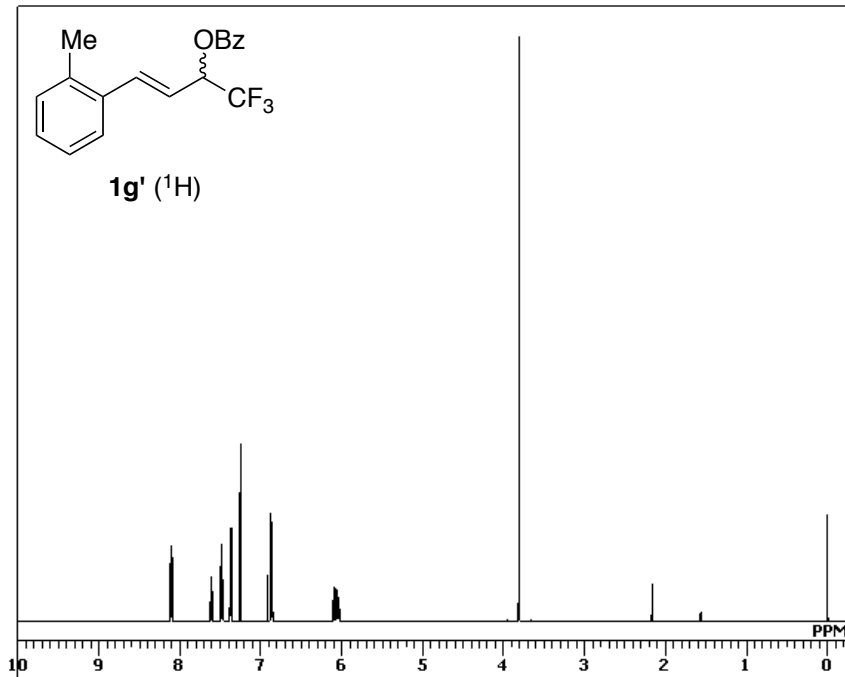

DFILE KI-1261-Fr1\_Proton-1.d  
COMNT KI-1261-Fr1  
DATIM 29-01-2012 23:08:34  
OBNUC 1H  
EXMOD proton.jxp  
OBFRQ 500.16 MHz  
OBSET 2.41 KHz  
OBFIN 6.01 Hz  
POINT 26214  
FREQU 7507.51 Hz  
SCANS 8  
ACQTM 3.4918 sec  
PD 5.0000 sec  
PW1 7.00 usec  
IRNUC 1H  
CTEMP 19.8 c  
SLVNT CDCL3  
EXREF 0.00 ppm  
BF 0.10 Hz  
RGAIN 34

KI-1261-Fr1

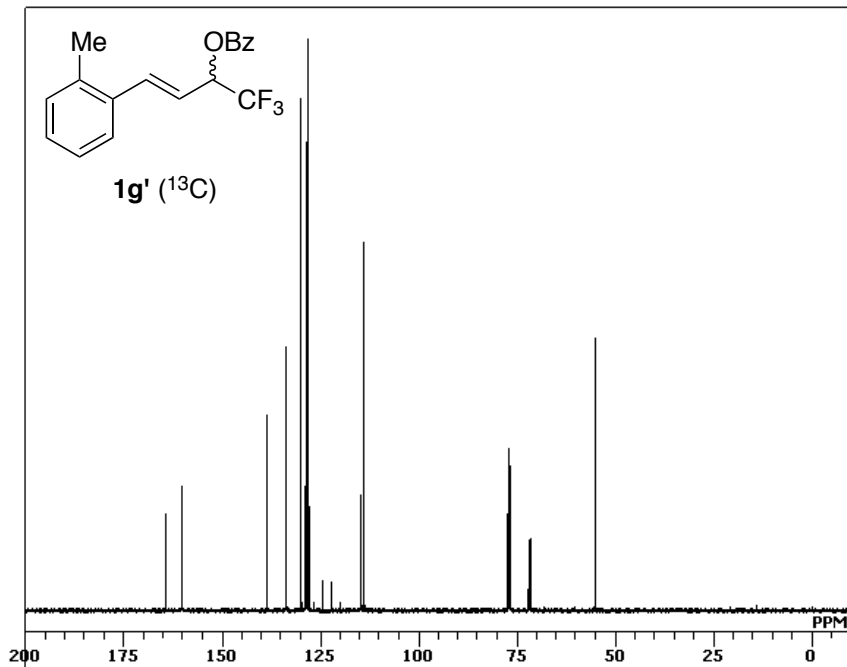

DFILE KI-1261-Fr1\_Carbon-1-  
COMNT KI-1261-Fr1  
DATIM 29-01-2012 23:21:04  
OBNUC 13C  
EXMOD carbon.jxp  
OBFRQ 125.77 MHz  
OBSET 7.87 KHz  
OBFIN 4.21 Hz  
POINT 26214  
FREQU 31446.54 Hz  
SCANS 128  
ACQTM 0.8336 sec  
PD 2.0000 sec  
PW1 3.90 usec  
IRNUC 1H  
CTEMP 20.5 c  
SLVNT CDCL3  
EXREF 77.00 ppm  
BF 1.00 Hz  
RGAIN 50

KI-1261-Fr1

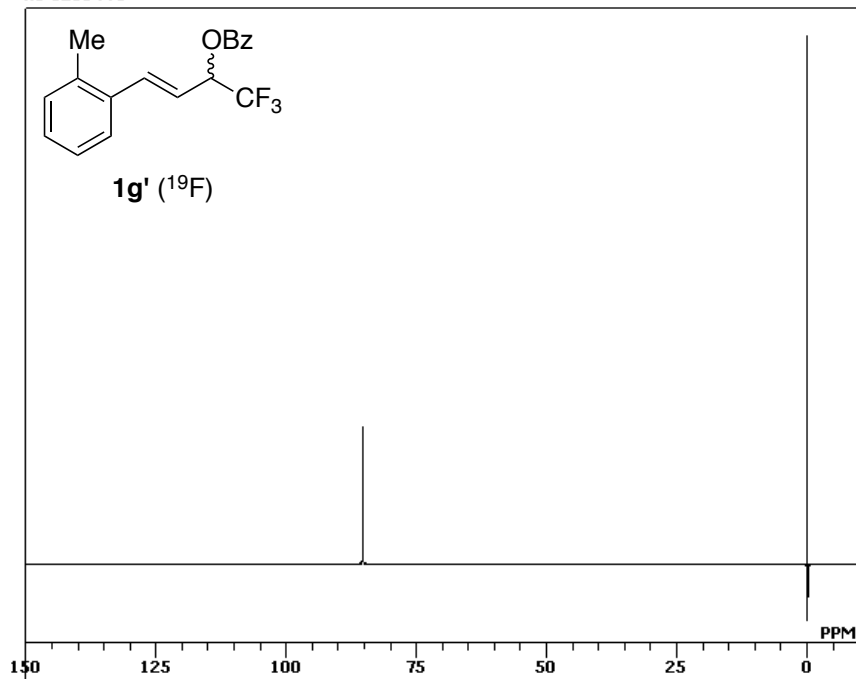

DFILE KI-1261-Fr1\_19F-1.als  
COMNT KI-1261-Fr1  
DATIM 29-01-2012 23:11:14  
OBNUC 19F  
EXMOD single\_pulse.jxp  
OBFRQ 470.62 MHz  
OBSET 0.46 KHz  
OBFIN 0.84 Hz  
POINT 13107  
FREQU 192307.69 Hz  
SCANS 8  
ACQTM 0.0682 sec  
PD 5.0000 sec  
PW1 8.50 usec  
IRNUC 19F  
CTEMP 19.8 c  
SLVNT CDCL3  
EXREF 0.00 ppm  
BF 1.00 Hz  
RGAIN 50

KI-1210

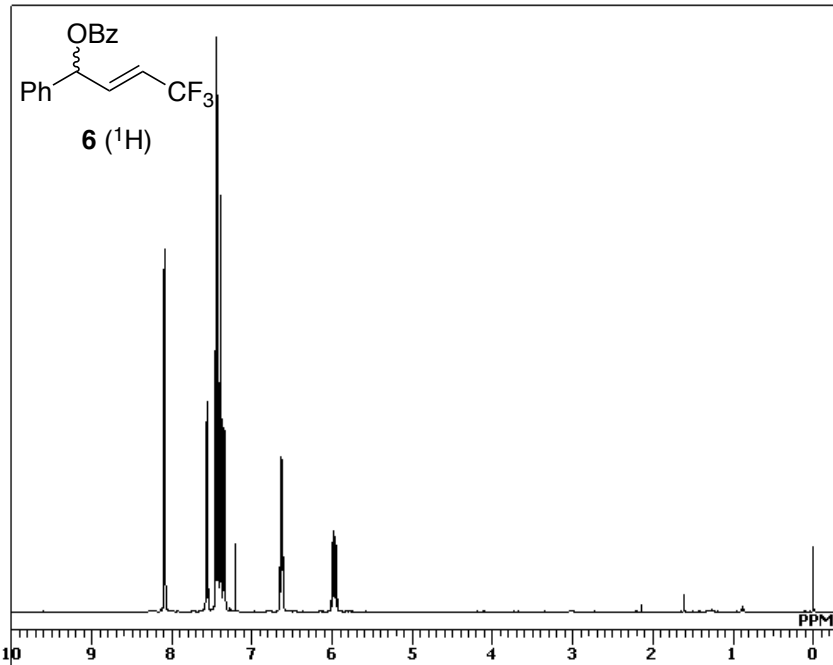

DFILE KI-1210\_Proton-1-1.als  
COMNT KI-1210  
DATIM 18-01-2012 16:06:06  
OBNUC 1H  
EXMOD proton.jxp  
OBFRQ 500.16 MHz  
OBSET 2.41 KHz  
OBFIN 6.01 Hz  
POINT 26214  
FREQU 7507.51 Hz  
SCANS 4  
ACQTM 3.4918 sec  
PD 5.0000 sec  
PW1 6.80 usec  
IRNUC 1H  
CTEMP 21.1 c  
SLVNT CDCL3  
EXREF 0.00 ppm  
BF 0.20 Hz  
RGAIN 30

KI-1191-Fr1

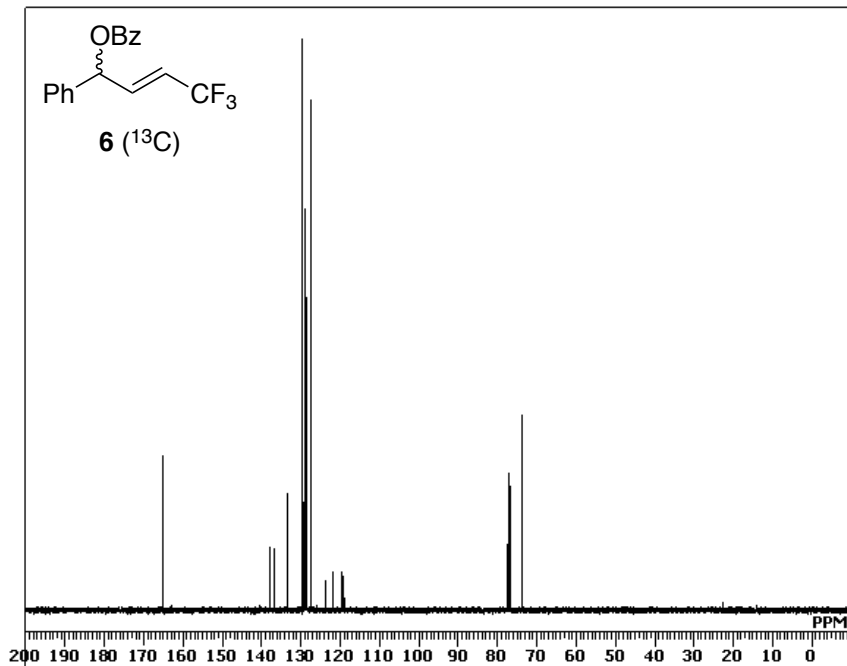

DFILE KI-1191-Fr1\_Carbon-1-  
COMNT KI-1191-Fr1  
DATIM 29-12-2011 06:03:44  
OBNUC 13C  
EXMOD carbon.jxp  
OBFRQ 125.77 MHz  
OBSET 7.87 KHz  
OBFIN 4.21 Hz  
POINT 26214  
FREQU 31446.54 Hz  
SCANS 128  
ACQTM 0.8336 sec  
PD 2.0000 sec  
PW1 3.90 usec  
IRNUC 1H  
CTEMP 20.1 c  
SLVNT CDCL3  
EXREF 77.00 ppm  
BF 0.20 Hz  
RGAIN 50



KI-1191-Fr1

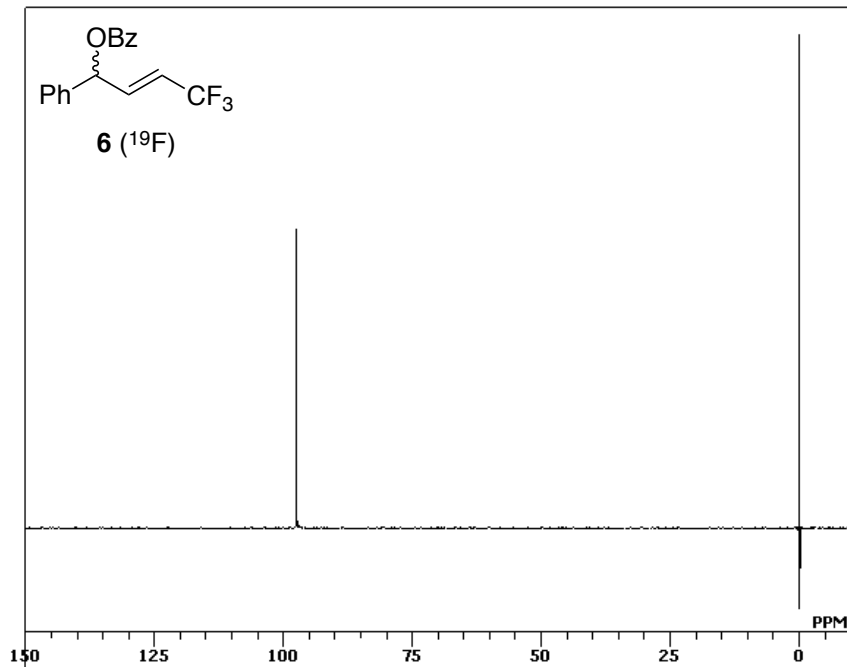

DFILE KI-1191-Fr1\_19F-1-1.al  
COMNT KI-1191-Fr1  
DATIM 29-12-2011 05:53:18  
OBNUC 19F  
EXMOD single\_pulse.jsp  
OBFRQ 470.62 MHz  
OBSET 0.46 KHz  
OBFIN 0.84 Hz  
POINT 13107  
FREQU 192307.69 Hz  
SCANS 8  
ACQTM 0.0682 sec  
PD 5.0000 sec  
PW1 7.00 usec  
IRNUC 19F  
CTEMP 19.9 c  
SLVNT CDCL3  
EXREF 0.00 ppm  
BF 0.20 Hz  
RGAIN 50

DEMM\_1H

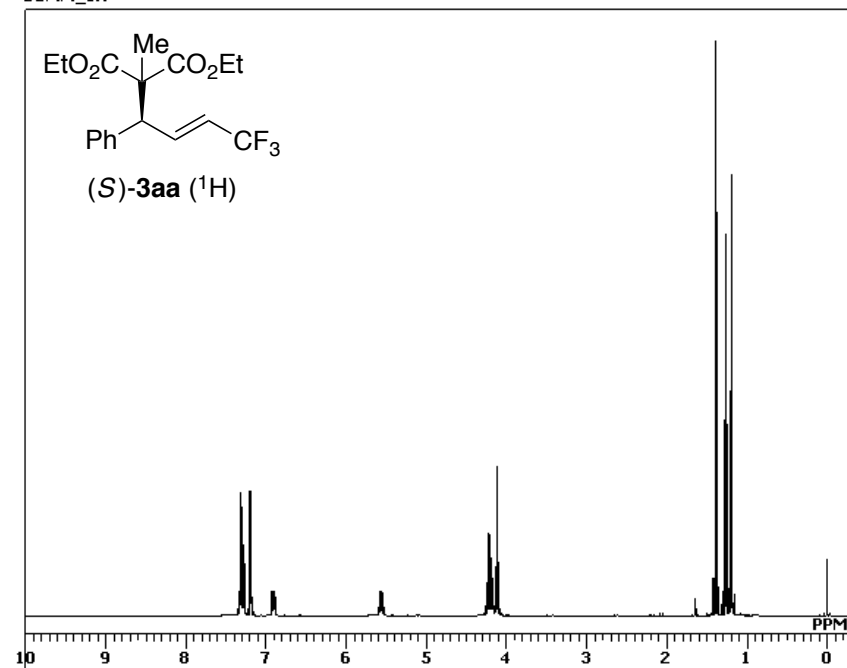

DFILE DEMM\_1H.als  
COMNT DEMM\_1H  
DATIM PSPIN%prog%mod%peak.  
OBNUC 1H  
EXMOD zg30  
OBFRQ 600.13 MHz  
OBSET 3.70 KHz  
OBFIN 6.05 Hz  
POINT 32768  
FREQU 12335.53 Hz  
SCANS 16  
ACQTM 2.6564 sec  
PD 1.0000 sec  
PW1 13.00 usec  
IRNUC  
CTEMP 19.3 c  
SLVNT CDCL3  
EXREF 16.43 ppm  
BF 0.30 Hz  
RGAIN 36

DEMM\_13C

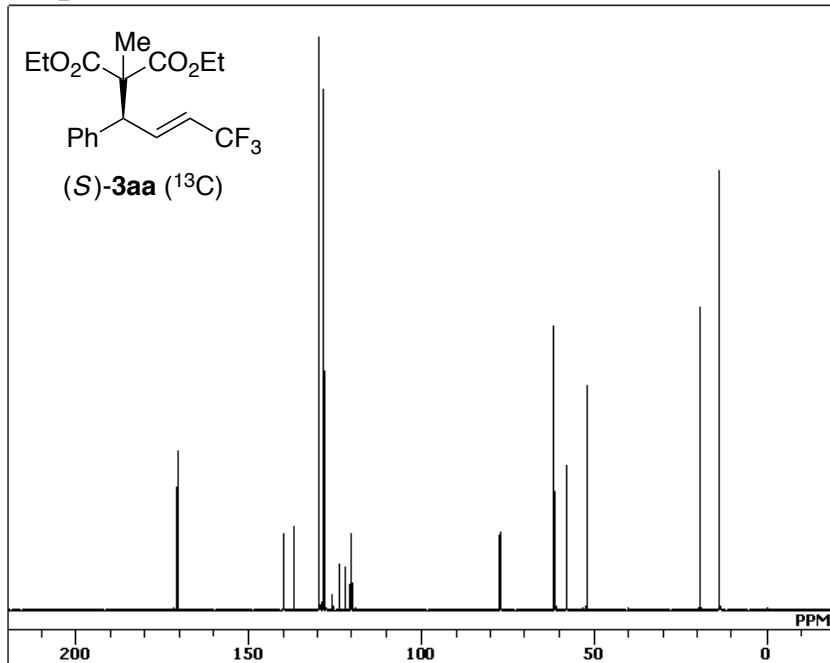

DFILE DEMM\_13C.als  
 COMNT DEMM\_13C  
 DATIM PSPIN\*prog\*mod\*peak.  
 OBNUC 13C  
 EXMOD zgpg30  
 OBFREQ 150.91 MHz  
 OBSET 7.89 KHz  
 OBFIN 8.81 Hz  
 POINT 32768  
 FREQU 36057.69 Hz  
 SCANS 128  
 ACQTM 0.9088 sec  
 PD 2.0000 sec  
 PW1 10.00 usec  
 IRNUC  
 CTEMP 20.7 c  
 SLVNT CDCl3  
 EXREF 219.47 ppm  
 BF 1.00 Hz  
 RGAIN 203

DEMM\_19F

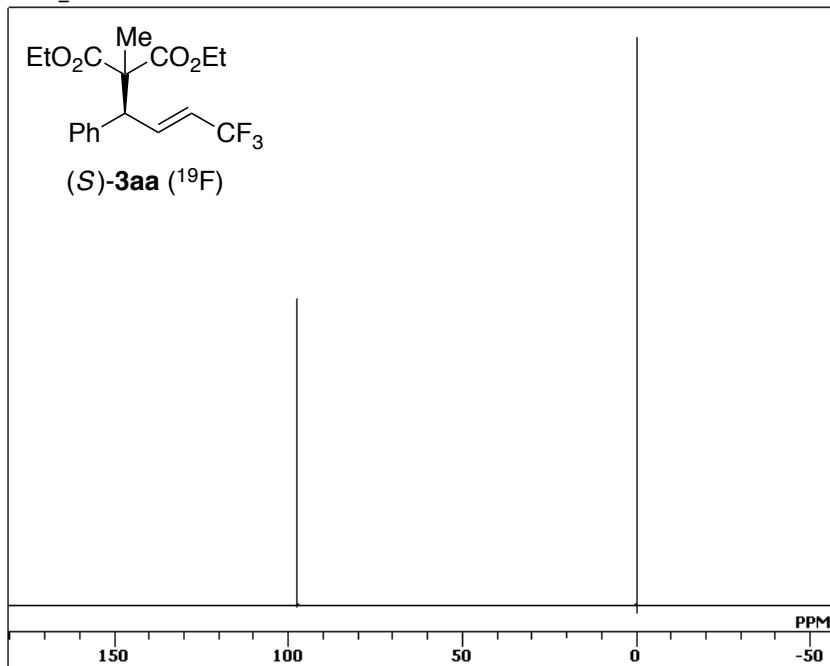

DFILE DEMM\_19F.als  
 COMNT DEMM\_19F  
 DATIM PSPIN\*prog\*mod\*peak.  
 OBNUC 19F  
 EXMOD zgfgqn  
 OBFREQ 564.62 MHz  
 OBSET 9.91 KHz  
 OBFIN 9.58 Hz  
 POINT 65536  
 FREQU 133928.58 Hz  
 SCANS 16  
 ACQTM 0.4894 sec  
 PD 1.0000 sec  
 PW1 14.20 usec  
 IRNUC  
 CTEMP 19.3 c  
 SLVNT CDCl3  
 EXREF 0.00 ppm  
 BF 0.30 Hz  
 RGAIN 90

Me- <CO2Me

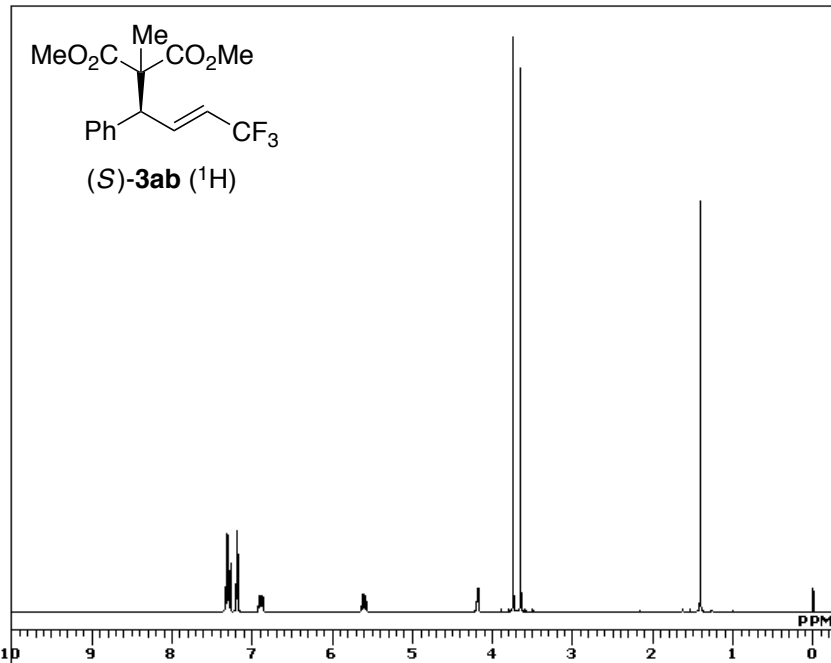

DFILE Me- fCO2Me\_Proton-1  
COMNT Me- <CO2Me  
DATIM 21-02-2012 23:01:09  
OBNUC 1H  
EXMOD proton.jsp  
OBFRQ 500.16 MHz  
OBSET 2.41 KHz  
OBFIN 6.01 Hz  
POINT 26214  
FREQU 7507.51 Hz  
SCANS 8  
ACQTM 3.4918 sec  
PD 5.0000 sec  
PW1 7.00 usec  
IRNUC 1H  
CTEMP 19.5 c  
SLVNT CDCL3  
EXREF 0.00 ppm  
BF 0.10 Hz  
RGAIN 30

Me- <CO2Me

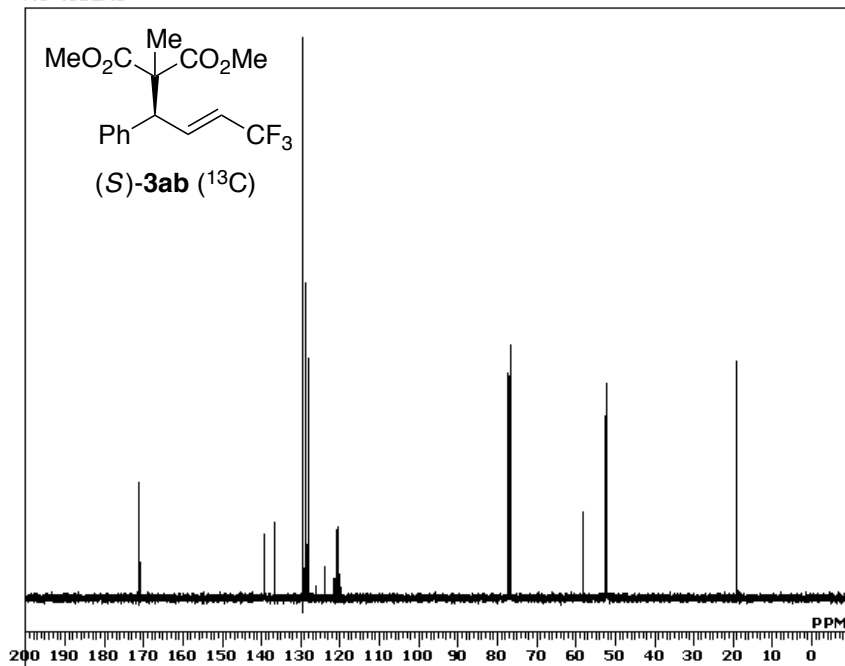

DFILE Me- fCO2Me\_Carbon-  
COMNT Me- <CO2Me  
DATIM 21-02-2012 23:02:42  
OBNUC 13C  
EXMOD carbon.jsp  
OBFRQ 125.77 MHz  
OBSET 7.87 KHz  
OBFIN 4.21 Hz  
POINT 26214  
FREQU 31446.54 Hz  
SCANS 128  
ACQTM 0.8336 sec  
PD 2.0000 sec  
PW1 3.90 usec  
IRNUC 1H  
CTEMP 20.1 c  
SLVNT CDCL3  
EXREF 77.00 ppm  
BF 0.12 Hz  
RGAIN 50

KI-1234-Fr1

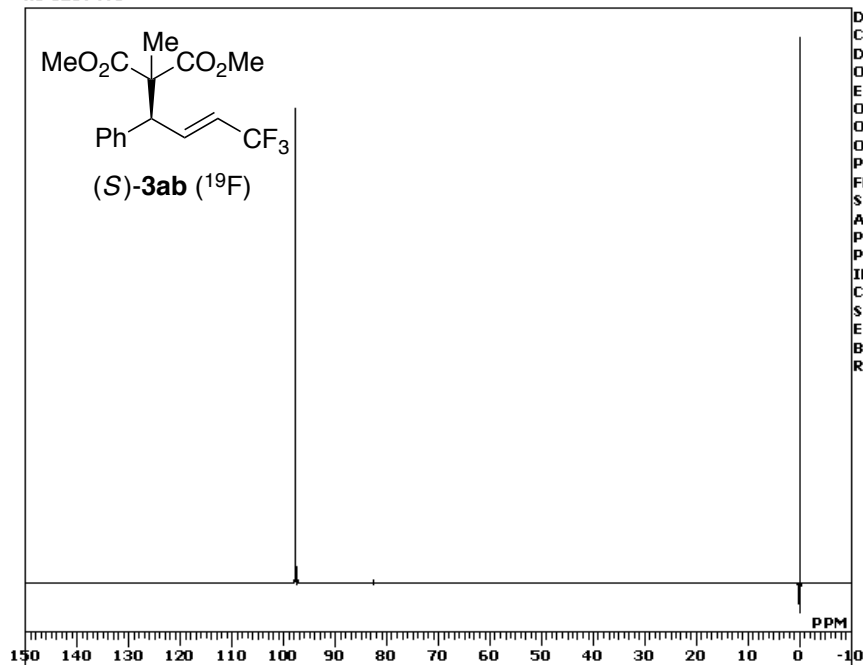

Allyl-<CO2Et

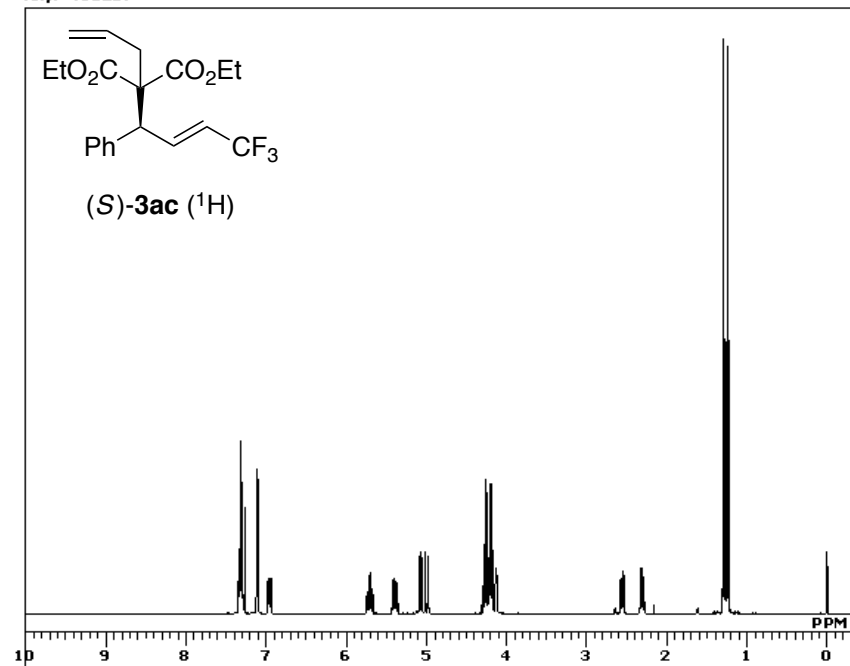

Allyl-<CO2Et

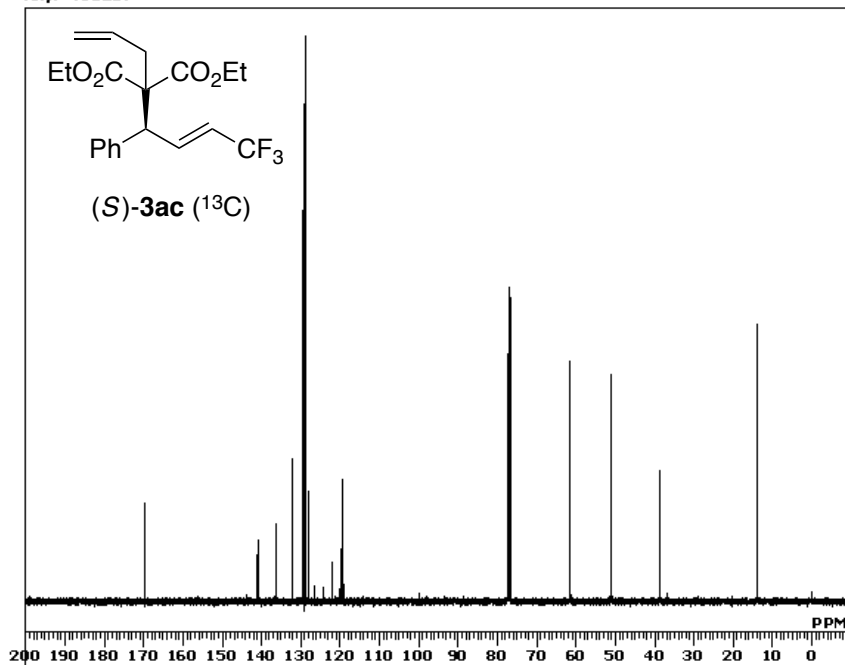

DFILE Allyl-fCO2Et\_Carbon-  
COMNT Allyl-<CO2Et  
DATIM 21-02-2012 23:32:56  
OBNUC 13C  
EXMOD carbon.jsp  
OBFRQ 125.77 MHz  
OBSET 7.87 KHz  
OBFIN 4.21 Hz  
POINT 26214  
FREQU 31446.54 Hz  
SCANS 291  
ACQTM 0.8336 sec  
PD 2.0000 sec  
PW1 3.90 usec  
IRNUC 1H  
CTEMP 20.3 c  
SLVNT CDCL3  
EXREF 77.00 ppm  
BF 0.12 Hz  
RGAIN 50

Allyl-<CO2Et

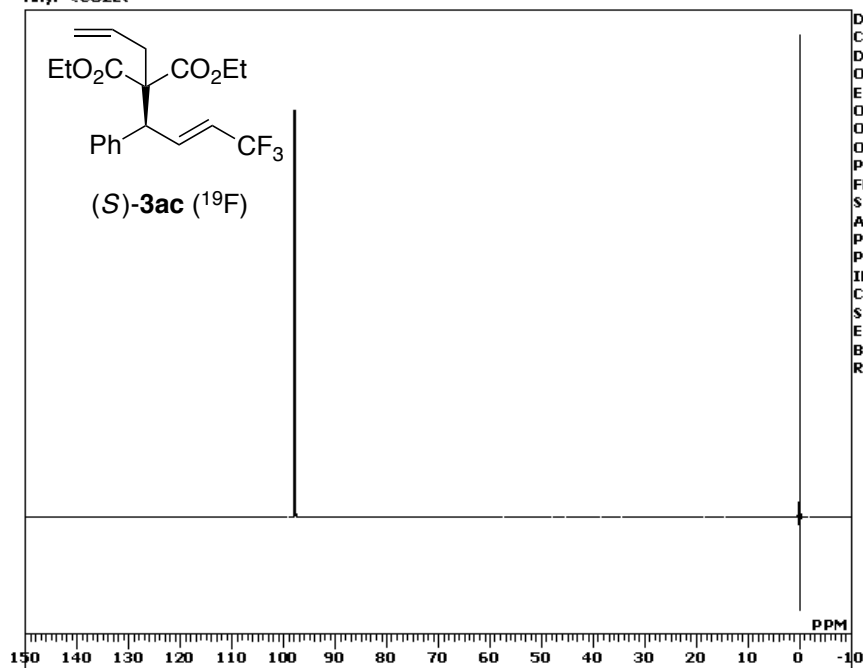

DFILE Allyl-fCO2Et\_19F-1-1  
COMNT Allyl-<CO2Et  
DATIM 20-02-2012 16:44:17  
OBNUC 19F  
EXMOD single\_pulse.jsp  
OBFRQ 470.62 MHz  
OBSET 0.46 KHz  
OBFIN 0.84 Hz  
POINT 13107  
FREQU 192307.69 Hz  
SCANS 8  
ACQTM 0.0682 sec  
PD 5.0000 sec  
PW1 8.50 usec  
IRNUC 19F  
CTEMP 18.9 c  
SLVNT CDCL3  
EXREF 0.00 ppm  
BF 1.00 Hz  
RGAIN 50

Bn <CO2Et

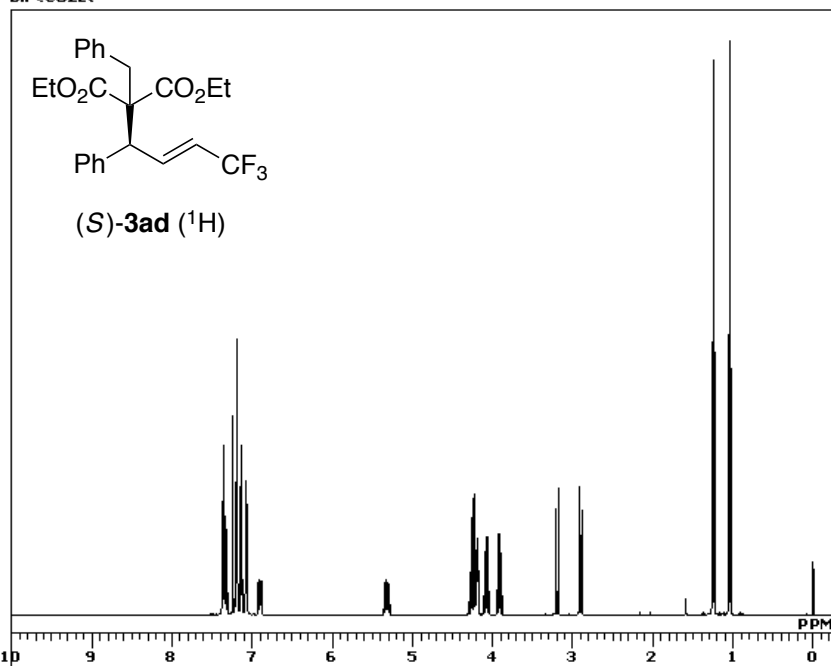

DFILE Bn-fCO2Et\_Proton-1-  
COMNT Bn <CO2Et  
DATIM 21-02-2012 23:14:53  
OBNUC 1H  
EXMOD proton.jsp  
OBFRQ 500.16 MHz  
OBSET 2.41 KHz  
OBFIN 6.01 Hz  
POINT 26214  
FREQU 7507.51 Hz  
SCANS 8  
ACQTM 3.4918 sec  
PD 5.0000 sec  
PW1 7.00 usec  
IRNUC 1H  
CTEMP 19.6 c  
SLVNT CDCL3  
EXREF 0.00 ppm  
BF 0.10 Hz  
RGAIN 28

Bn <CO2Et

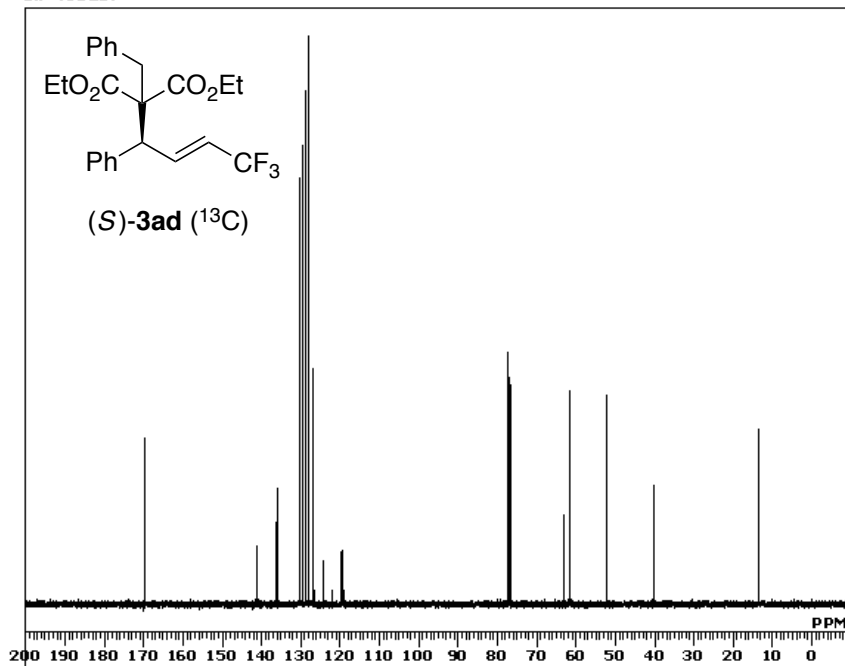

DFILE Bn-fCO2Et\_Carbon-1-  
COMNT Bn <CO2Et  
DATIM 21-02-2012 23:16:27  
OBNUC 13C  
EXMOD carbon.jsp  
OBFRQ 125.77 MHz  
OBSET 7.87 KHz  
OBFIN 4.21 Hz  
POINT 26214  
FREQU 31446.54 Hz  
SCANS 201  
ACQTM 0.8336 sec  
PD 2.0000 sec  
PW1 3.90 usec  
IRNUC 1H  
CTEMP 20.2 c  
SLVNT CDCL3  
EXREF 77.00 ppm  
BF 0.12 Hz  
RGAIN 50

KI-1245-Fr1

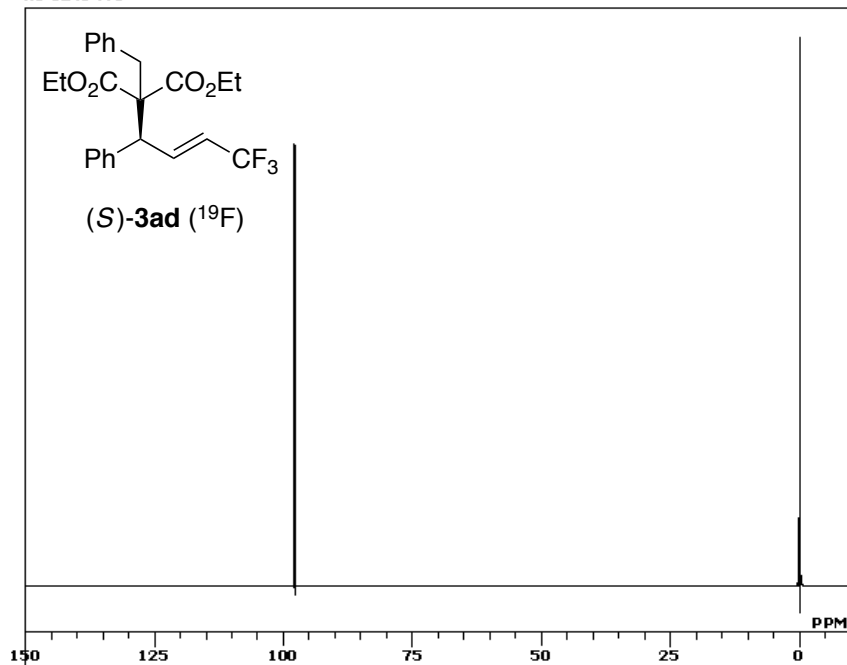

DFILE KI-1245-Fr1\_19F-1-1.a  
COMNT KI-1245-Fr1  
DATIM 24-01-2012 20:20:17  
OBNUC 19F  
EXMOD single\_pulse.jsp  
OBFRQ 470.62 MHz  
OBSET 0.46 KHz  
OBFIN 0.84 Hz  
POINT 13107  
FREQU 192307.69 Hz  
SCANS 8  
ACQTM 0.0682 sec  
PD 5.0000 sec  
PW1 7.00 usec  
IRNUC 19F  
CTEMP 21.2 c  
SLVNT CDCL3  
EXREF 0.00 ppm  
BF 0.10 Hz  
RGAIN 50

KI-1256-Fr1

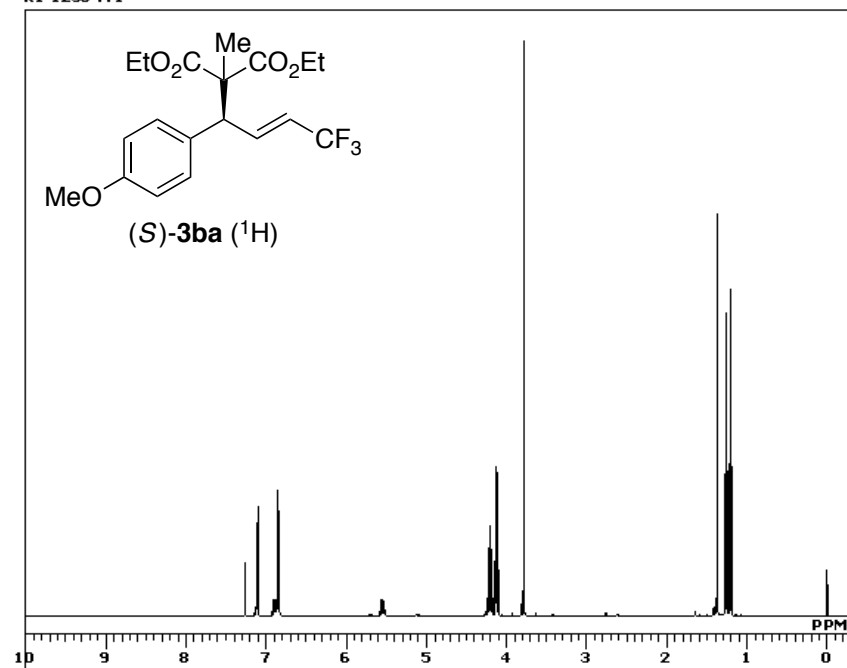

DFILE KI-1256-Fr1\_Proton-1-  
COMNT KI-1256-Fr1  
DATIM 25-01-2012 15:36:41  
OBNUC 1H  
EXMOD proton.jsp  
OBFRQ 500.16 MHz  
OBSET 2.41 KHz  
OBFIN 6.01 Hz  
POINT 26214  
FREQU 7507.51 Hz  
SCANS 4  
ACQTM 3.4918 sec  
PD 5.0000 sec  
PW1 6.80 usec  
IRNUC 1H  
CTEMP 20.5 c  
SLVNT CDCL3  
EXREF 0.00 ppm  
BF 0.10 Hz  
RGAIN 32

KI-1256-Fr1

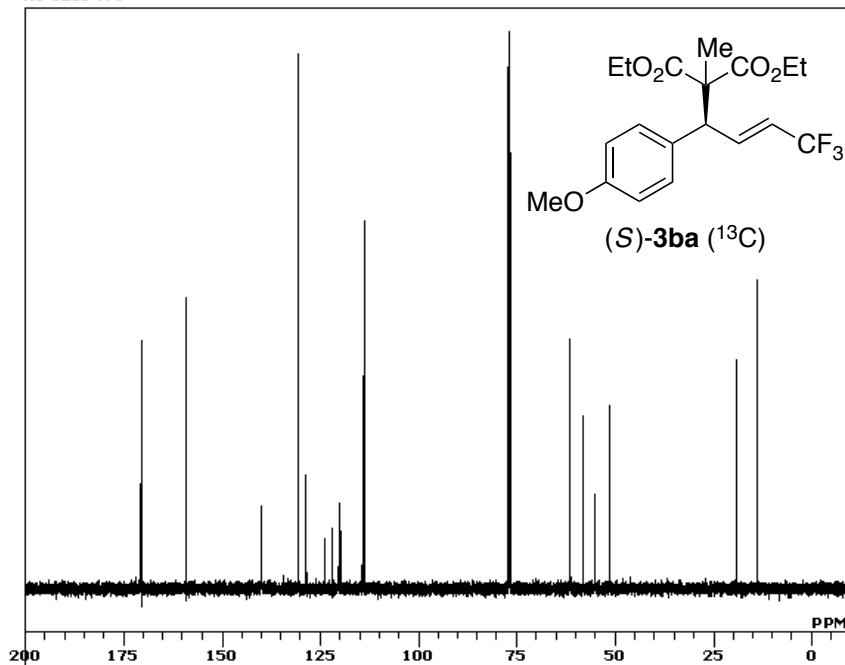

DFILE KI-1256-Fr1\_Carbon-1-  
 COMNT KI-1256-Fr1  
 DATIM 25-01-2012 15:42:60  
 OBNUC 13C  
 EXMOD carbon.jsp  
 OBFRQ 125.77 MHz  
 OBSET 7.87 KHz  
 OBFIN 4.21 Hz  
 POINT 26214  
 FREQU 31446.54 Hz  
 SCANS 400  
 ACQTM 0.8336 sec  
 PD 2.0000 sec  
 PW1 3.90 usec  
 IRNUC 1H  
 CTEMP 20.9 c  
 SLVNT CDCL3  
 EXREF 77.00 ppm  
 BF 0.12 Hz  
 RGAIN 50

KI-1237-Fr2

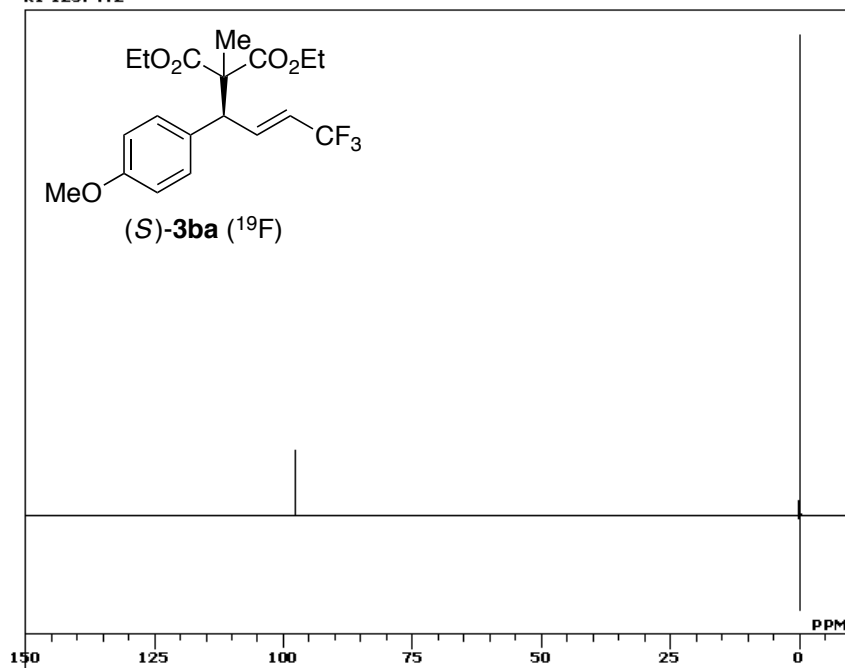

DFILE KI-1237-Fr2\_19F-1-1.a  
 COMNT KI-1237-Fr2  
 DATIM 19-01-2012 23:38:21  
 OBNUC 19F  
 EXMOD single\_pulse.jsp  
 OBFRQ 470.62 MHz  
 OBSET 0.46 KHz  
 OBFIN 0.84 Hz  
 POINT 13107  
 FREQU 192307.69 Hz  
 SCANS 8  
 ACQTM 0.0682 sec  
 PD 5.0000 sec  
 PW1 7.00 usec  
 IRNUC 19F  
 CTEMP 21.3 c  
 SLVNT CDCL3  
 EXREF 0.00 ppm  
 BF 0.20 Hz  
 RGAIN 50



KI-1236-Fr1-Fr1

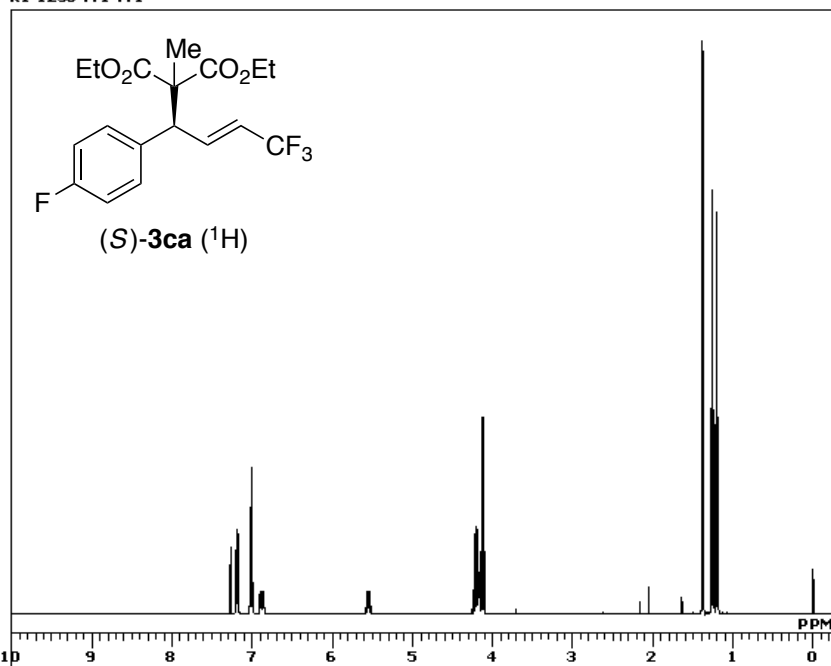

DFILE KI-1236-Fr1-Fr1\_Proto  
 COMNT KI-1236-Fr1-Fr1  
 DATIM 23-01-2012 23:35:41  
 OBNUC 1H  
 EXMOD proton.jsp  
 OBFRQ 500.16 MHz  
 OBSET 2.41 KHz  
 OBFIN 6.01 Hz  
 POINT 26214  
 FREQU 7507.51 Hz  
 SCANS 4  
 ACQTM 3.4918 sec  
 PD 5.0000 sec  
 PW1 6.80 usec  
 IRNUC 1H  
 CTEMP 21.3 c  
 SLVNT CDCL3  
 EXREF 0.00 ppm  
 BF 0.10 Hz  
 RGAIN 34

KI-1236-Fr1-Fr1

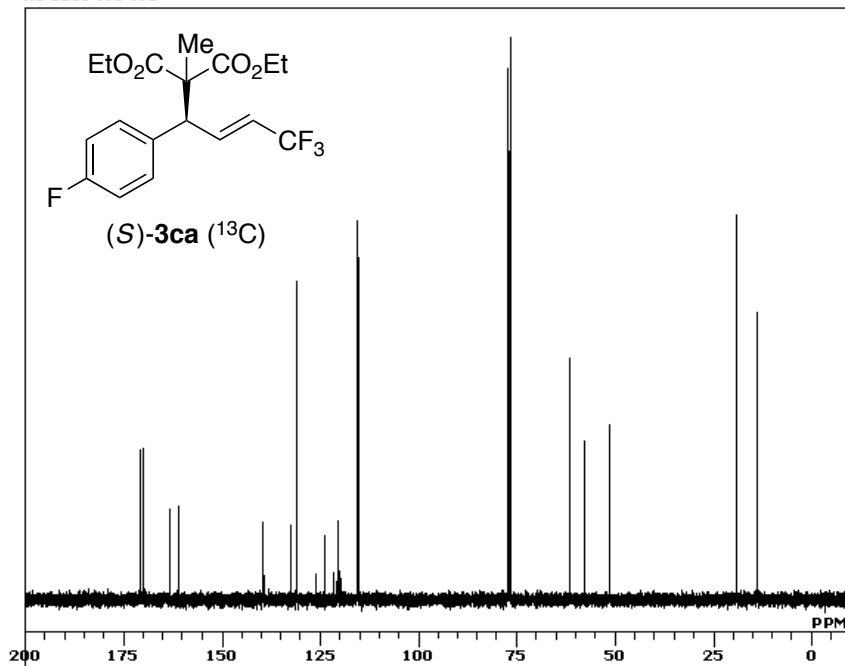

DFILE KI-1236-Fr1-Fr1\_Carbo  
 COMNT KI-1236-Fr1-Fr1  
 DATIM 23-01-2012 23:36:39  
 OBNUC 13C  
 EXMOD carbon.jsp  
 OBFRQ 125.77 MHz  
 OBSET 7.87 KHz  
 OBFIN 4.21 Hz  
 POINT 26214  
 FREQU 31446.54 Hz  
 SCANS 316  
 ACQTM 0.8336 sec  
 PD 2.0000 sec  
 PW1 3.90 usec  
 IRNUC 1H  
 CTEMP 21.5 c  
 SLVNT CDCL3  
 EXREF 77.00 ppm  
 BF 0.10 Hz  
 RGAIN 50

KI-1236-Fr1

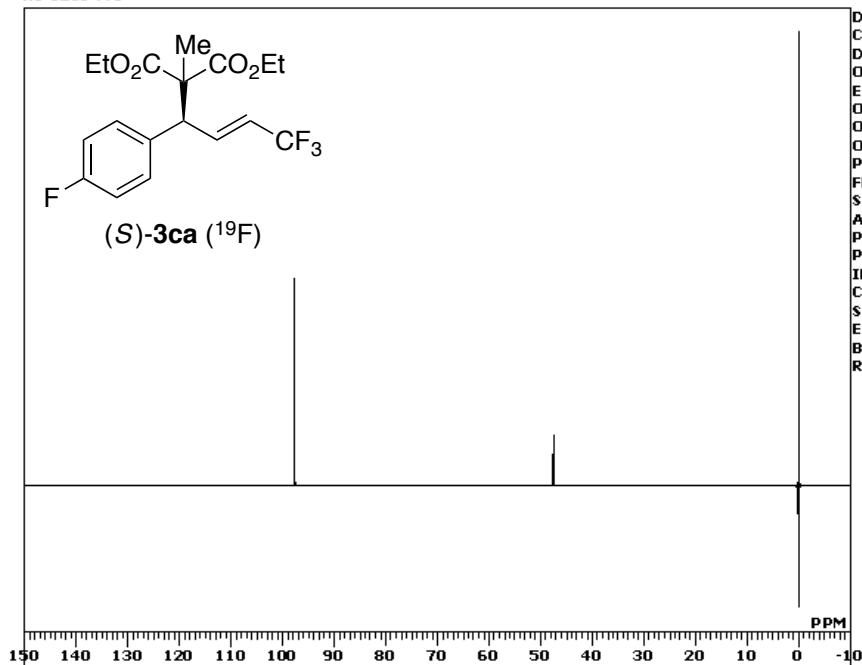

DFILE KI-1236-Fr1\_19F-1-1.a  
COMNT KI-1236-Fr1  
DATIM 19-01-2012 23:29:59  
OBNUC 19F  
EXMOD single\_pulse.jsp  
OBFRQ 470.62 MHz  
OBSET 0.46 KHz  
OBFIN 0.84 Hz  
POINT 13107  
FREQU 192307.69 Hz  
SCANS 8  
ACQTM 0.0682 sec  
PD 5.0000 sec  
PW1 7.00 usec  
IRNUC 19F  
CTEMP 21.2 c  
SLVNT CDCL3  
EXREF 0.00 ppm  
BF 0.20 Hz  
RGAIN 50

p-Cl-Ph\_Me-<CO2Et

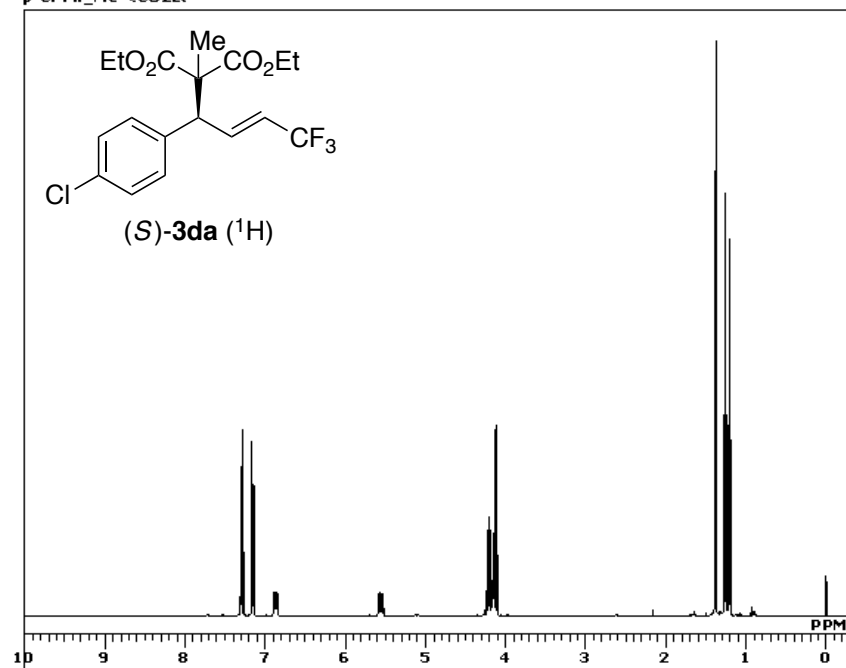

DFILE p-Cl-Ph\_Me-fCO2Et\_1  
COMNT p-Cl-Ph\_Me-<CO2Et  
DATIM 21-02-2012 23:52:19  
OBNUC 1H  
EXMOD proton.jsp  
OBFRQ 500.16 MHz  
OBSET 2.41 KHz  
OBFIN 6.01 Hz  
POINT 26214  
FREQU 7507.51 Hz  
SCANS 8  
ACQTM 3.4918 sec  
PD 5.0000 sec  
PW1 7.00 usec  
IRNUC 1H  
CTEMP 19.7 c  
SLVNT CDCL3  
EXREF 0.00 ppm  
BF 0.10 Hz  
RGAIN 30

p-Cl-Ph\_Me-<CO2Et

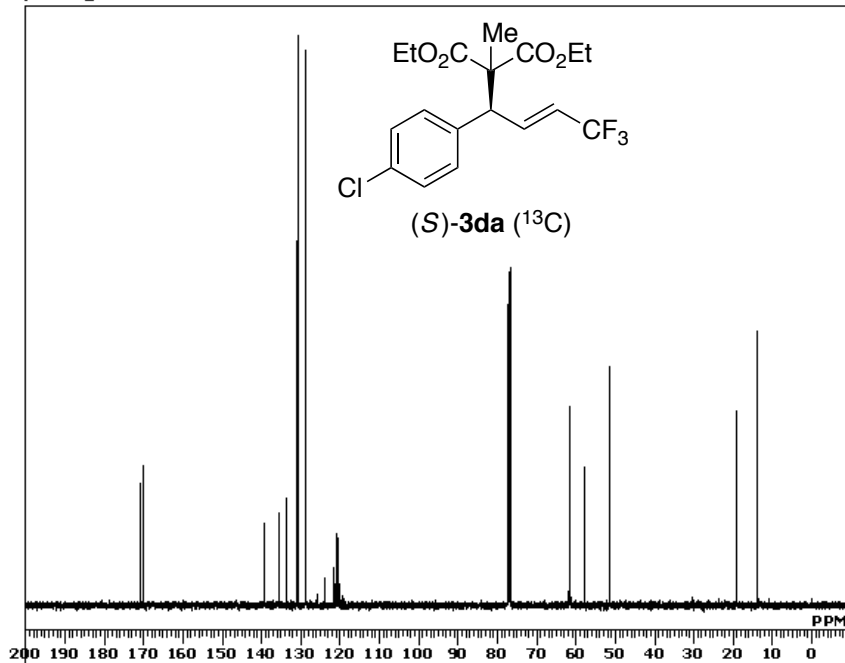

DFILE p-Cl-Ph\_Me-fCO2Et\_1  
COMNT p-Cl-Ph\_Me-<CO2Et  
DATIM 21-02-2012 23:53:51  
OBNUC 13C  
EXMOD carbon.jsp  
OBFREQ 125.77 MHz  
OBSET 7.87 KHz  
OBFIN 4.21 Hz  
POINT 26214  
FREQU 31446.54 Hz  
SCANS 200  
ACQTM 0.8336 sec  
PD 2.0000 sec  
PW1 3.90 usec  
IRNUC 1H  
CTEMP 20.2 c  
SLVNT CDCL3  
EXREF 77.00 ppm  
BF 1.00 Hz  
RGAIN 50

KI-1239-Fr1

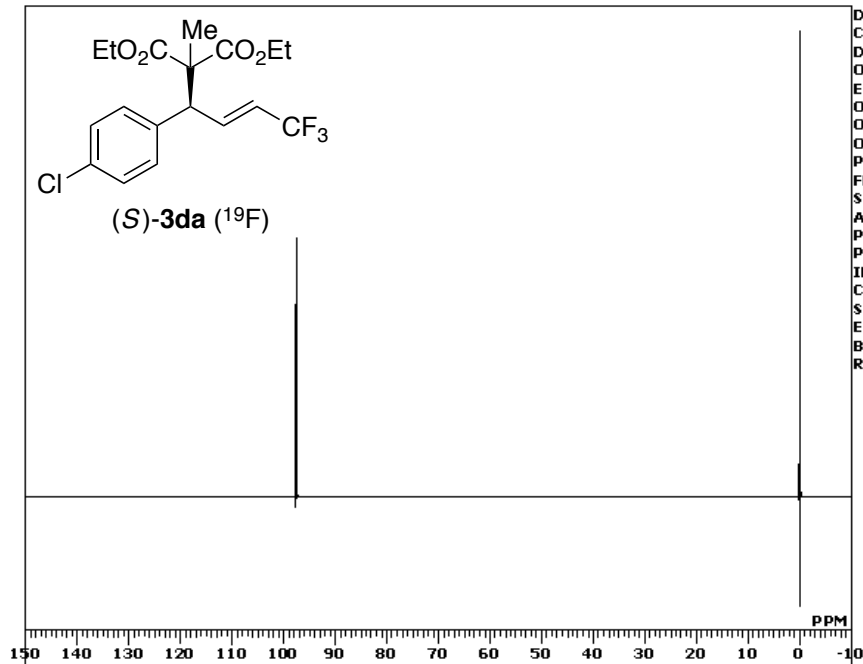

DFILE KI-1239-Fr1\_19F-1-1.a  
COMNT KI-1239-Fr1  
DATIM 19-01-2012 23:53:22  
OBNUC 19F  
EXMOD single\_pulse.jsp  
OBFREQ 470.62 MHz  
OBSET 0.46 KHz  
OBFIN 0.84 Hz  
POINT 13107  
FREQU 192307.69 Hz  
SCANS 8  
ACQTM 0.0682 sec  
PD 5.0000 sec  
PW1 7.00 usec  
IRNUC 19F  
CTEMP 21.3 c  
SLVNT CDCL3  
EXREF 0.00 ppm  
BF 0.20 Hz  
RGAIN 50

KI-1246-Fr1

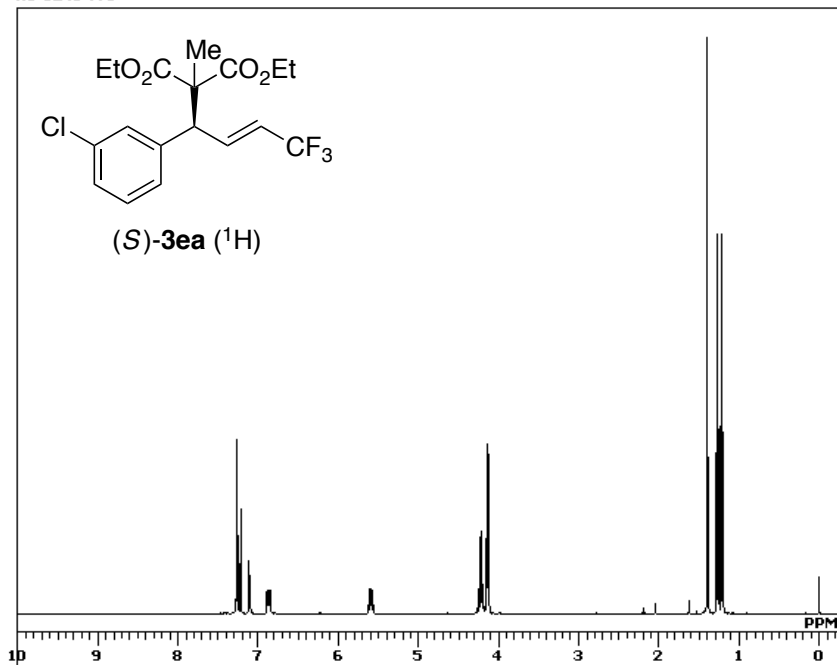

DFILE KI-1246-Fr1\_Proton-2-  
COMNT KI-1246-Fr1  
DATIM 18-01-2012 15:57:53  
OBNUC 1H  
EXMOD proton.jsp  
OBFRQ 500.16 MHz  
OBSET 2.41 KHz  
OBFIN 6.01 Hz  
POINT 26214  
FREQU 7507.51 Hz  
SCANS 4  
ACQTM 3.4918 sec  
PD 5.0000 sec  
PW1 6.80 usec  
IRNUC 1H  
CTEMP 21.0 c  
SLVNT CDCL3  
EXREF 0.00 ppm  
BF 0.20 Hz  
RGAIN 32

KI-1257-Fr1

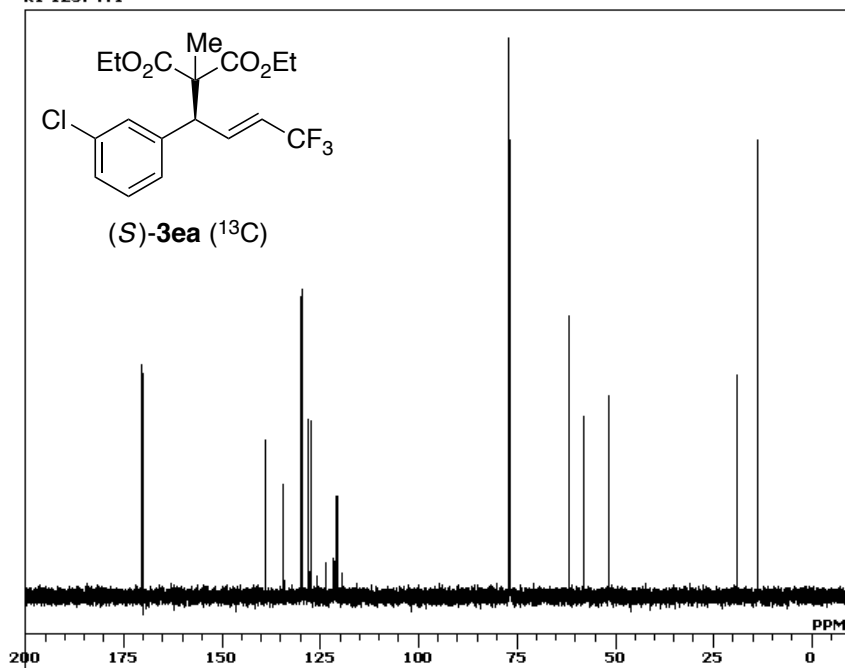

DFILE KI-1257-Fr1\_Carbon-1-  
COMNT KI-1257-Fr1  
DATIM 25-01-2012 16:08:29  
OBNUC 13C  
EXMOD carbon.jsp  
OBFRQ 125.77 MHz  
OBSET 7.87 KHz  
OBFIN 4.21 Hz  
POINT 26214  
FREQU 31446.54 Hz  
SCANS 206  
ACQTM 0.8336 sec  
PD 2.0000 sec  
PW1 3.90 usec  
IRNUC 1H  
CTEMP 20.9 c  
SLVNT CDCL3  
EXREF 77.00 ppm  
BF 0.12 Hz  
RGAIN 50

KI-1240-Fr2

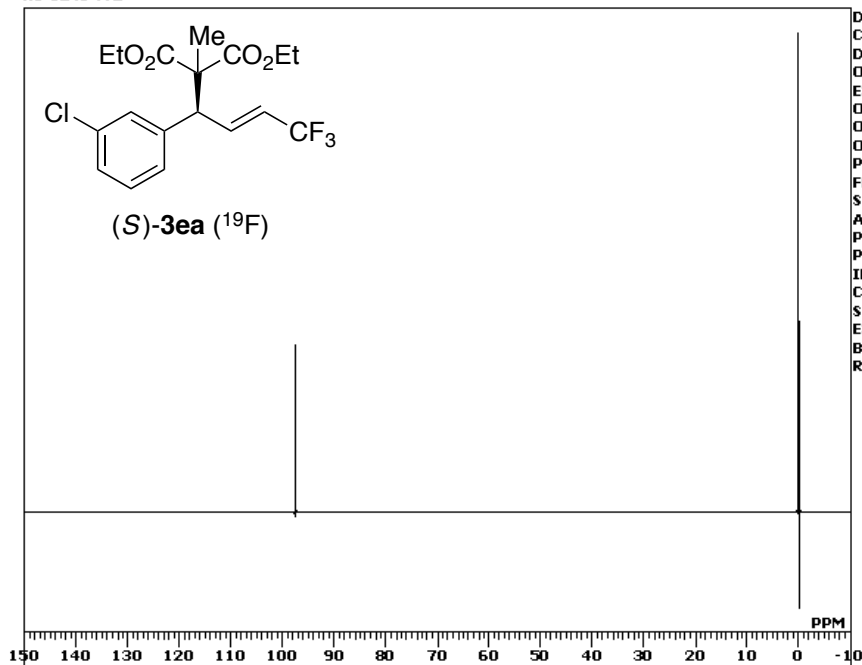

DFILE KI-1240-Fr2\_19F-1-1.a  
 COMNT KI-1240-Fr2  
 DATIM 20-01-2012 00:00:45  
 OBNUC 19F  
 EXMOD single\_pulse.jsp  
 OBFRQ 470.62 MHz  
 OBSET 0.46 KHz  
 OBFIN 0.84 Hz  
 POINT 13107  
 FREQU 192307.69 Hz  
 SCANS 8  
 ACQTM 0.0682 sec  
 PD 5.0000 sec  
 PW1 7.00 usec  
 IRNUC 19F  
 CTEMP 21.3 c  
 SLVNT CDCL3  
 EXREF 0.00 ppm  
 BF 0.20 Hz  
 RGAIN 50

naphtyl-Me-<CO2Et

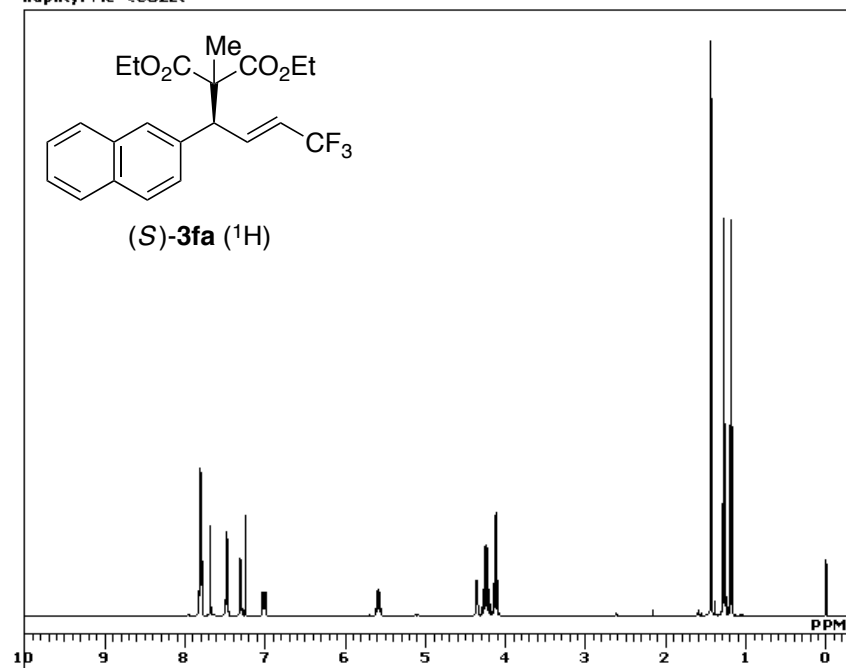

DFILE naphtyl-Me- $\square$ fCO2Et\_f  
 COMNT naphtyl-Me-<CO2Et  
 DATIM 22-02-2012 00:34:27  
 OBNUC 1H  
 EXMOD proton.jsp  
 OBFRQ 500.16 MHz  
 OBSET 2.41 KHz  
 OBFIN 6.01 Hz  
 POINT 26214  
 FREQU 7507.51 Hz  
 SCANS 8  
 ACQTM 3.4918 sec  
 PD 5.0000 sec  
 PW1 7.00 usec  
 IRNUC 1H  
 CTEMP 19.6 c  
 SLVNT CDCL3  
 EXREF 0.00 ppm  
 BF 0.12 Hz  
 RGAIN 30

naphtyl-Me-<CO2Et

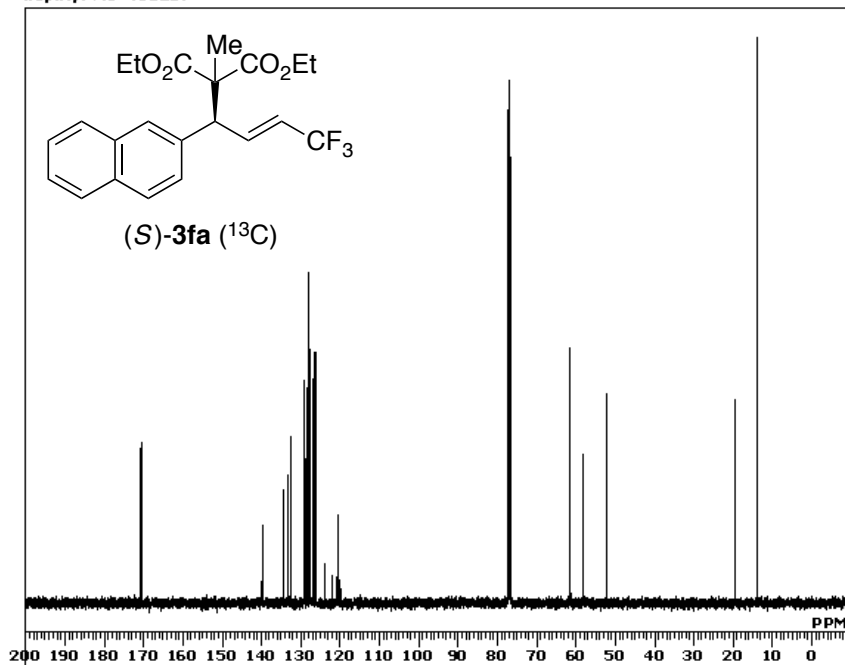

DFILE naphtyl-Me-fCO2Et\_C  
COMNT naphtyl-Me-<CO2Et  
DATIM 22-02-2012 00:35:60  
OBNUC 13C  
EXMOD carbon.jsp  
OBFRQ 125.77 MHz  
OBSET 7.87 KHz  
OBFIN 4.21 Hz  
POINT 26214  
FREQU 31446.54 Hz  
SCANS 200  
ACQTM 0.8336 sec  
PD 2.0000 sec  
PW1 3.90 usec  
IRNUC 1H  
CTEMP 20.1 c  
SLVNT CDCL3  
EXREF 77.00 ppm  
BF 1.00 Hz  
RGAIN 50

KI-1242-Fr2

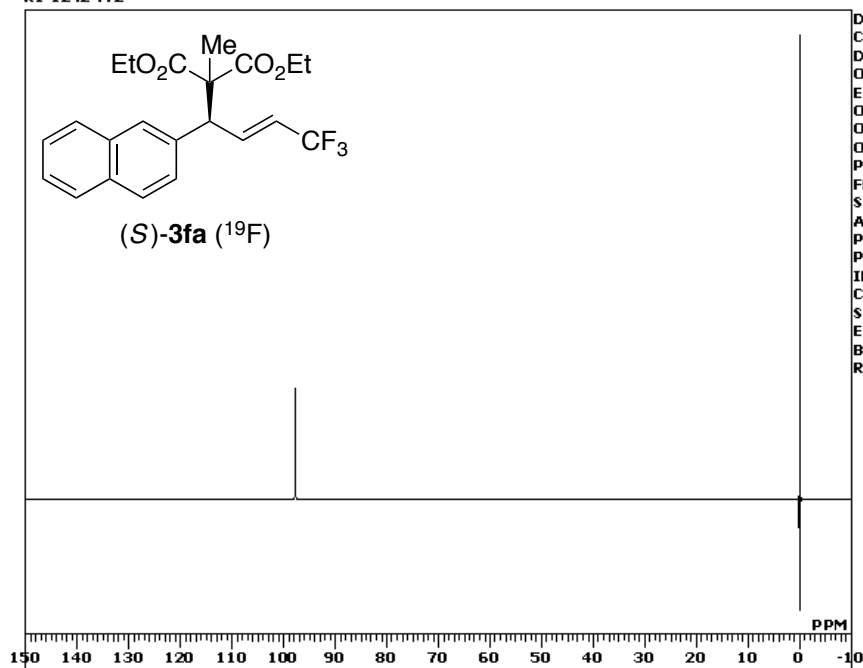

DFILE KI-1242-Fr2\_19F-1-1.al  
COMNT KI-1242-Fr2  
DATIM 20-01-2012 00:04:28  
OBNUC 19F  
EXMOD single\_pulse.jsp  
OBFRQ 470.62 MHz  
OBSET 0.46 KHz  
OBFIN 0.84 Hz  
POINT 13107  
FREQU 192307.69 Hz  
SCANS 8  
ACQTM 0.0682 sec  
PD 5.0000 sec  
PW1 7.00 usec  
IRNUC 19F  
CTEMP 21.3 c  
SLVNT CDCL3  
EXREF 0.00 ppm  
BF 0.20 Hz  
RGAIN 50

KI-1238-Fr2-Fr1

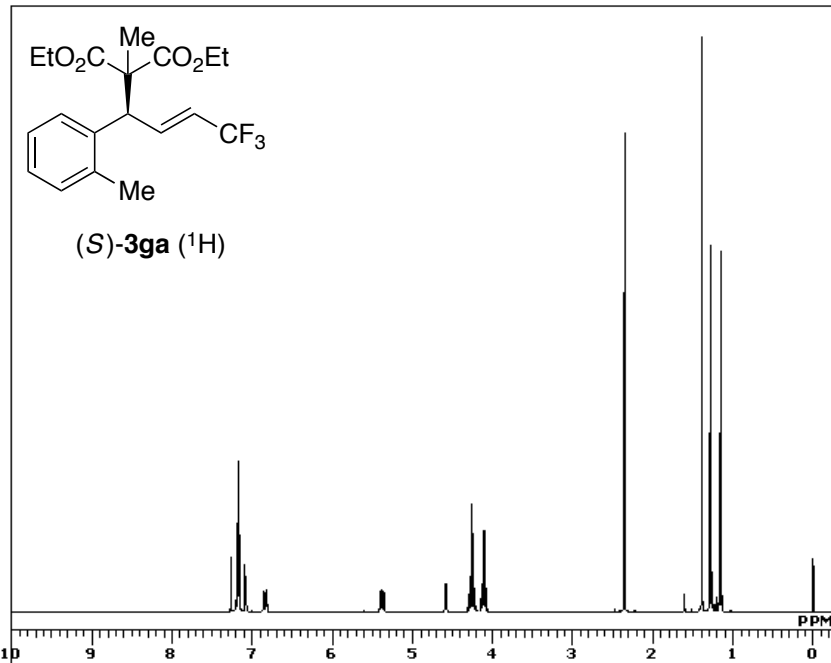

DFILE KI-1238-Fr2-Fr1\_Proto  
COMNT KI-1238-Fr2-Fr1  
DATIM 23-02-2012 09:10:12  
OBNUC 1H  
EXMOD proton.jsp  
OBFRQ 500.16 MHz  
OBSET 2.41 KHz  
OBFIN 6.01 Hz  
POINT 26214  
FREQU 7507.51 Hz  
SCANS 8  
ACQTM 3.4918 sec  
PD 5.0000 sec  
PW1 7.00 usec  
IRNUC 1H  
CTEMP 20.3 c  
SLVNT CDCL3  
EXREF 0.00 ppm  
BF 0.10 Hz  
RGAIN 30

KI-1238-Fr2-Fr1

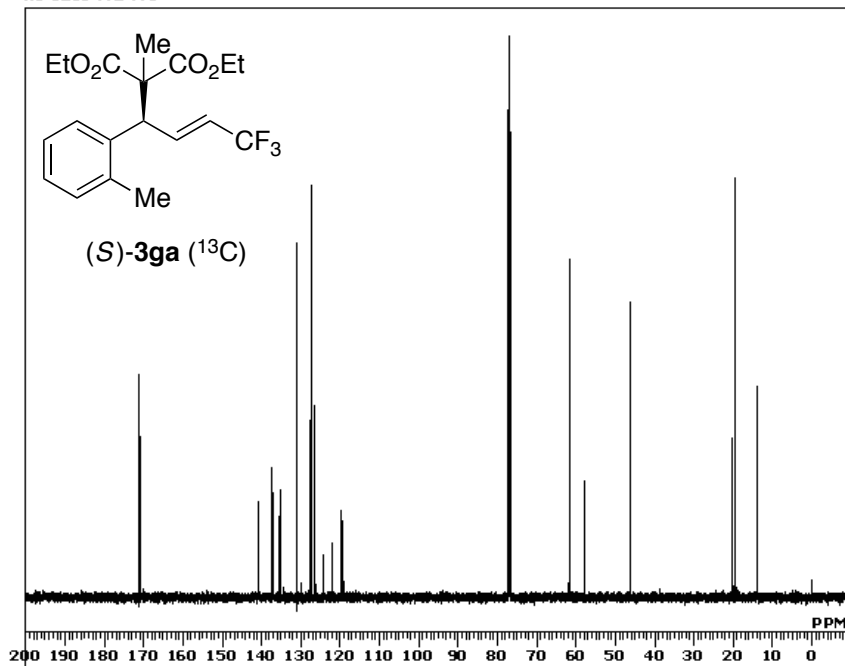

DFILE KI-1238-Fr2-Fr1\_Carbo  
COMNT KI-1238-Fr2-Fr1  
DATIM 23-02-2012 09:11:44  
OBNUC 13C  
EXMOD carbon.jsp  
OBFRQ 125.77 MHz  
OBSET 7.87 KHz  
OBFIN 4.21 Hz  
POINT 26214  
FREQU 31446.54 Hz  
SCANS 560  
ACQTM 0.8336 sec  
PD 2.0000 sec  
PW1 3.90 usec  
IRNUC 1H  
CTEMP 21.0 c  
SLVNT CDCL3  
EXREF 77.00 ppm  
BF 0.10 Hz  
RGAIN 50

KI-1238-Fr2

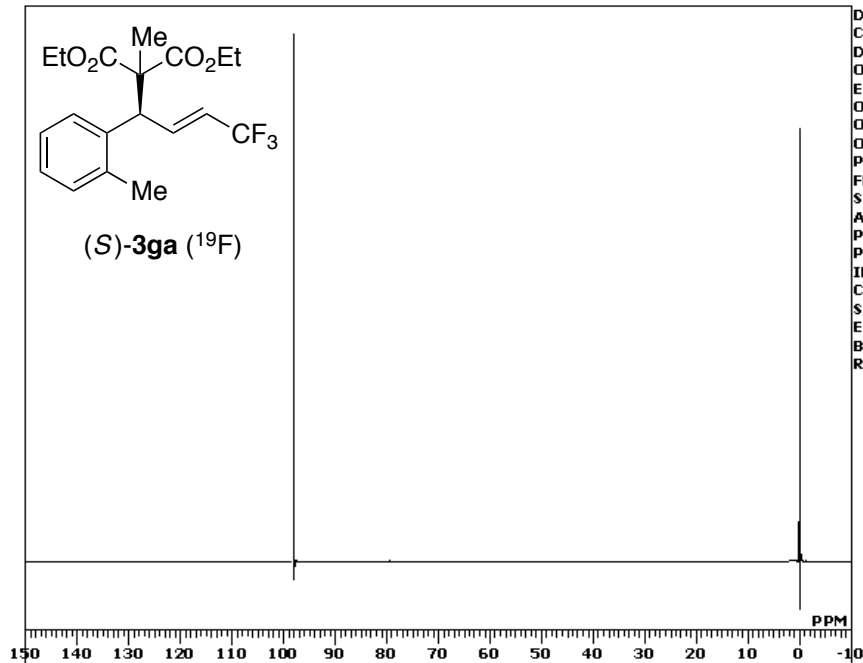

DFILE KI-1238-Fr2\_19F-1-1.a  
COMNT KI-1238-Fr2  
DATIM 19-01-2012 23:46:09  
OBNUC 19F  
EXMOD single\_pulse.jsp  
OBFRQ 470.62 MHz  
OBSET 0.46 KHz  
OBFIN 0.84 Hz  
POINT 13107  
FREQU 192307.69 Hz  
SCANS 8  
ACQTM 0.0682 sec  
PD 5.0000 sec  
PW1 7.00 usec  
IRNUC 19F  
CTEMP 21.3 c  
SLVNT CDCL3  
EXREF 0.00 ppm  
BF 0.20 Hz  
RGAIN 50

KI-1124-Fr1D

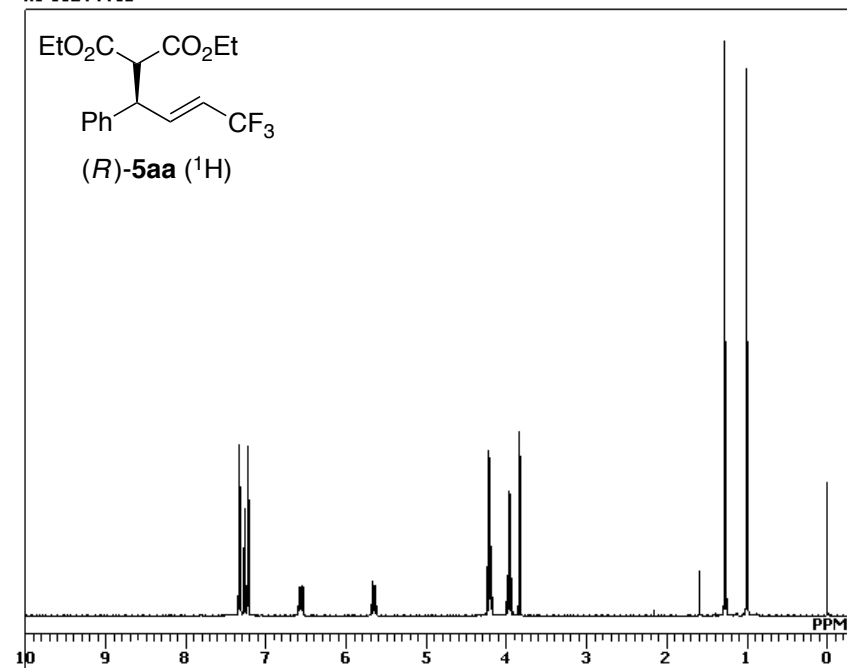

DFILE KI-1124-Fr1D\_Proton-1  
COMNT KI-1124-Fr1D  
DATIM 24-11-2011 20:34:44  
OBNUC 1H  
EXMOD proton.jsp  
OBFRQ 500.16 MHz  
OBSET 2.41 KHz  
OBFIN 6.01 Hz  
POINT 26214  
FREQU 7507.51 Hz  
SCANS 8  
ACQTM 3.4918 sec  
PD 5.0000 sec  
PW1 6.80 usec  
IRNUC 1H  
CTEMP 22.7 c  
SLVNT CDCL3  
EXREF 0.00 ppm  
BF 0.10 Hz  
RGAIN 36



KI-1004,1005

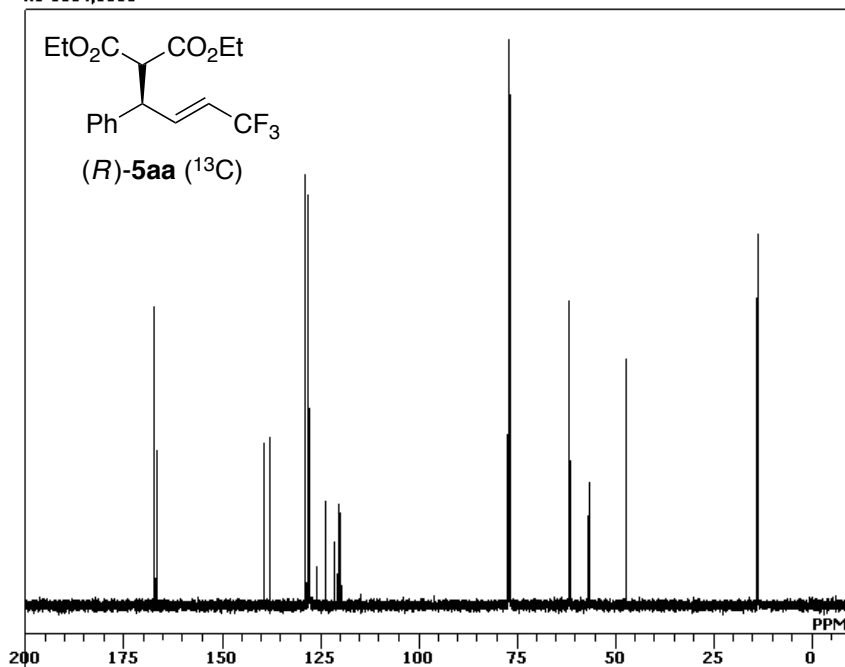

DFILE KI-1004,1005\_Carbon-  
 COMNT KI-1004,1005  
 DATIM 21-09-2011 14:16:25  
 OBNUC 13C  
 EXMOD carbon.jxp  
 OBFREQ 125.77 MHz  
 OBSET 7.87 KHz  
 OBFIN 4.21 Hz  
 POINT 26214  
 FREQU 31446.54 Hz  
 SCANS 512  
 ACQTM 0.8336 sec  
 PD 2.0000 sec  
 PW1 3.90 usec  
 IRNUC 1H  
 CTEMP 26.0 c  
 SLVNT CDCL3  
 EXREF 77.00 ppm  
 BF 0.10 Hz  
 RGAIN 50

KI-1005-Fr1

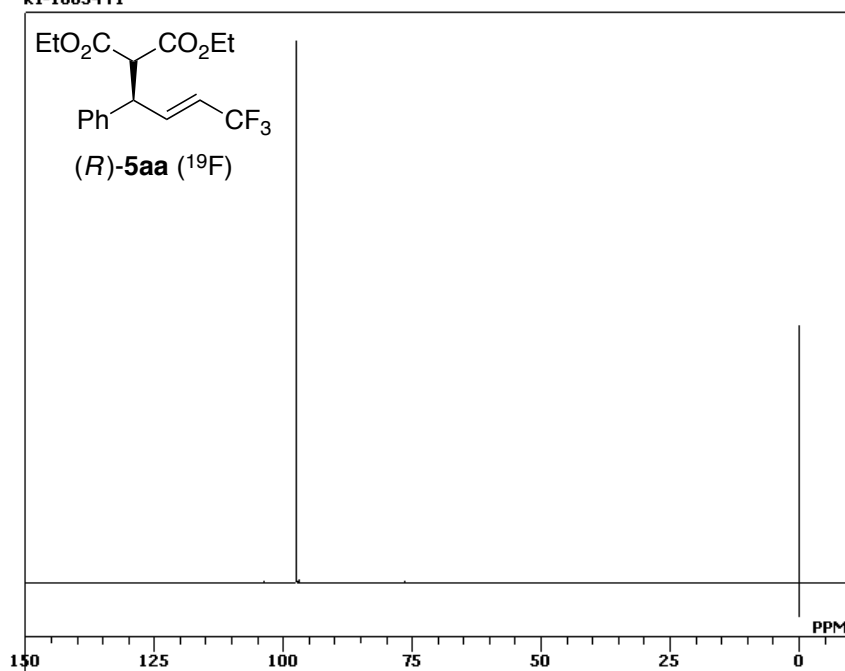

DFILE KI-1005-Fr1\_19F-1-1.al  
 COMNT KI-1005-Fr1  
 DATIM 20-09-2011 15:56:40  
 OBNUC 19F  
 EXMOD single\_pulse.jxp  
 OBFREQ 470.62 MHz  
 OBSET 0.46 KHz  
 OBFIN 0.84 Hz  
 POINT 52428  
 FREQU 192307.69 Hz  
 SCANS 16  
 ACQTM 0.2726 sec  
 PD 5.0000 sec  
 PW1 7.00 usec  
 IRNUC 19F  
 CTEMP 24.9 c  
 SLVNT CDCL3  
 EXREF 0.00 ppm  
 BF 0.30 Hz  
 RGAIN 50

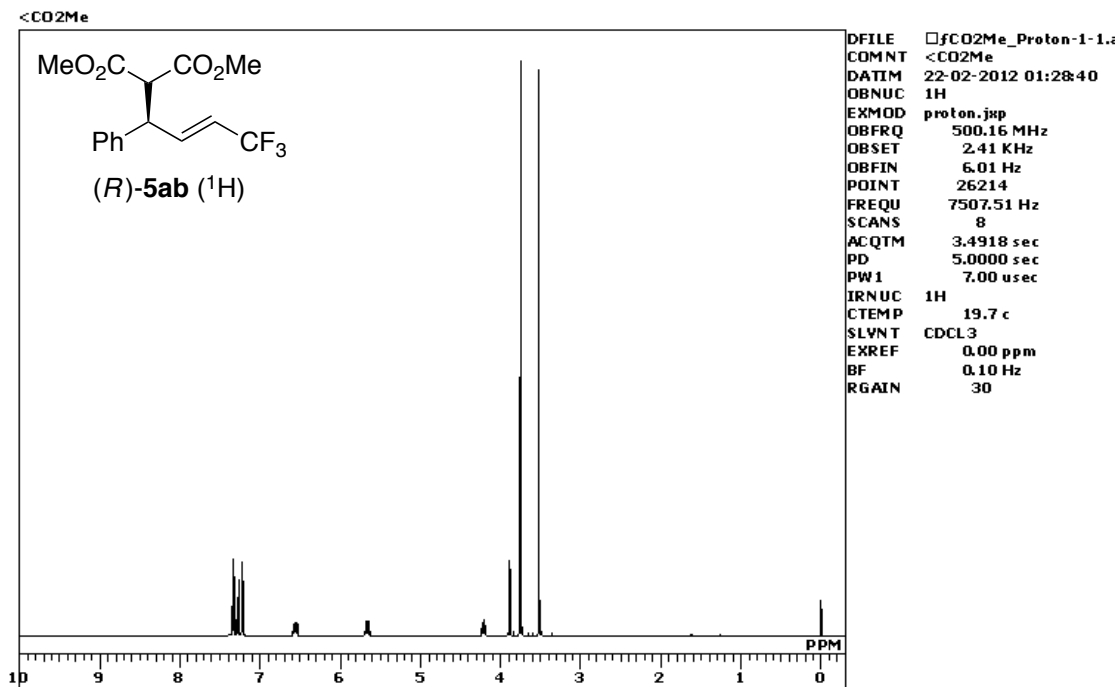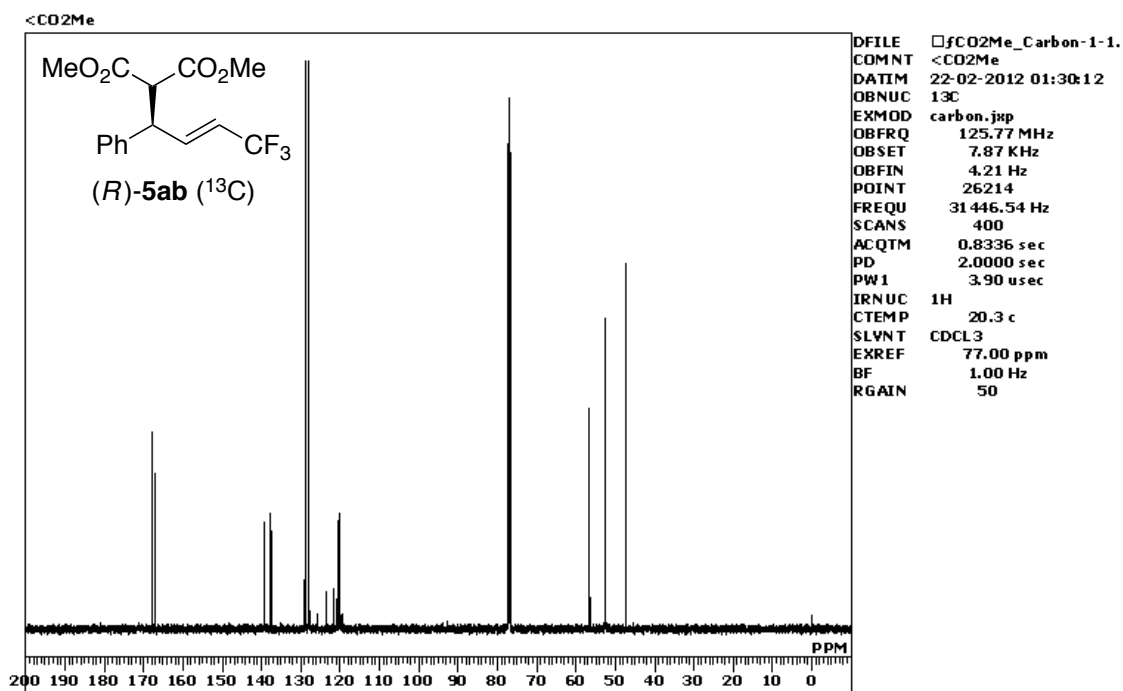

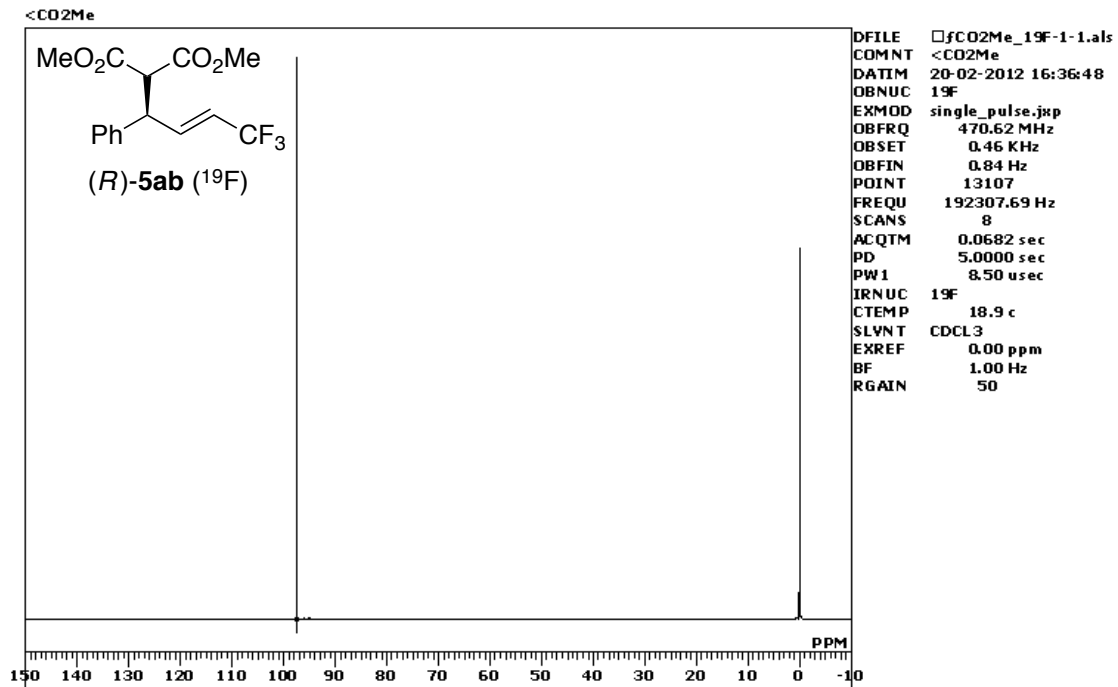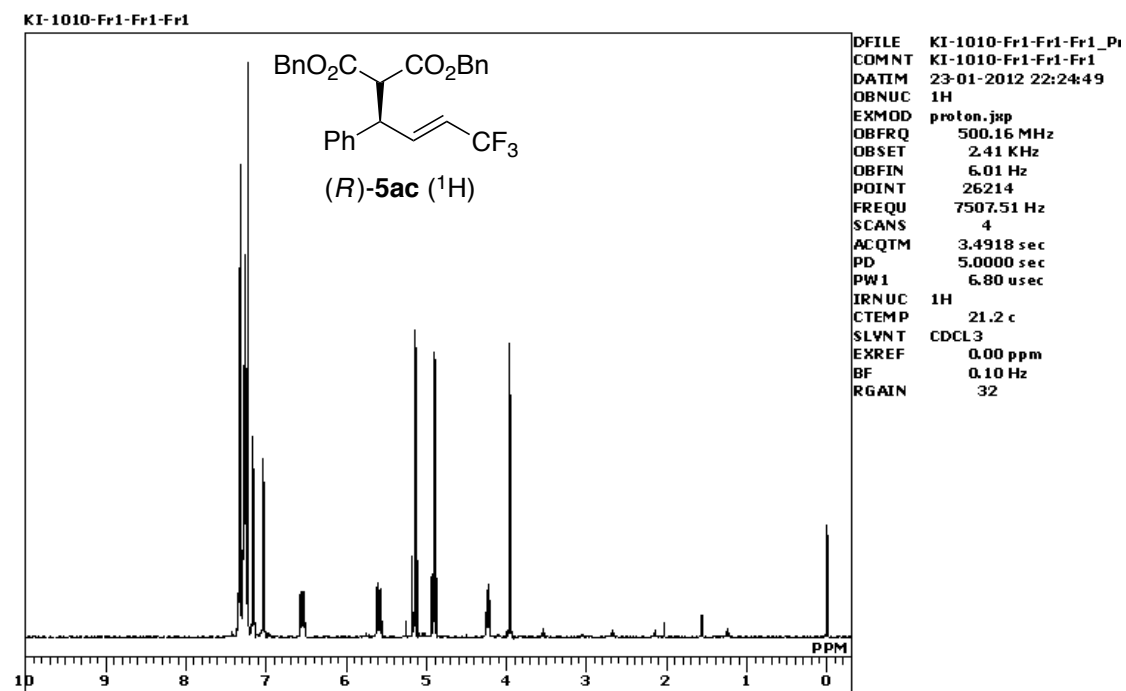

KI-1010-Fr1-Fr1-Fr1

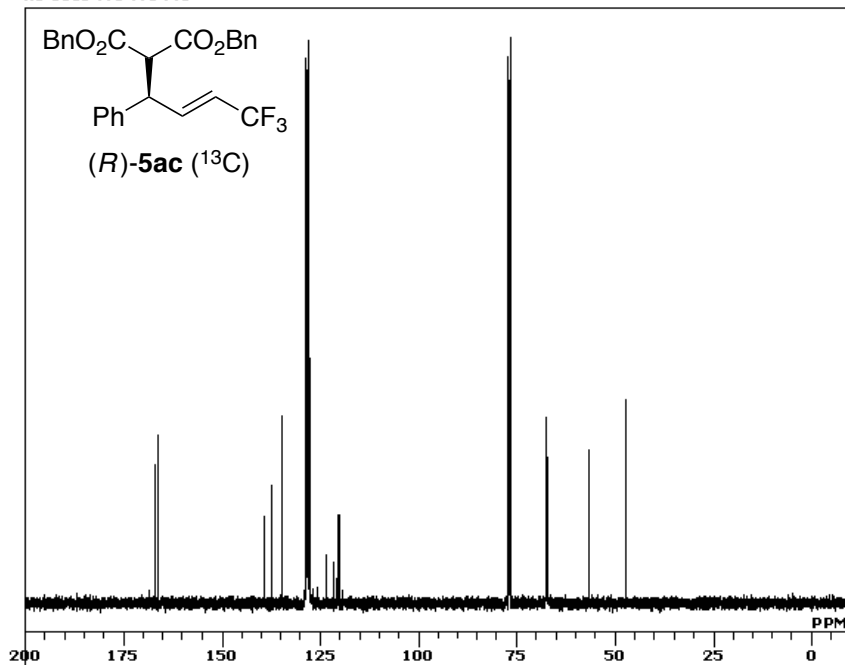

DFILE KI-1010-Fr1-Fr1-Fr1\_C  
 COMNT KI-1010-Fr1-Fr1-Fr1  
 DATIM 23-01-2012 22:25:47  
 OBNUC 13C  
 EXMOD carbon.jsp  
 OBFREQ 125.77 MHz  
 OBSET 7.87 KHz  
 OBFIN 4.21 Hz  
 POINT 26214  
 FREQU 31446.54 Hz  
 SCANS 256  
 ACQTM 0.8336 sec  
 PD 2.0000 sec  
 PW1 3.90 usec  
 IRNUC 1H  
 CTEMP 21.6 c  
 SLVNT CDCL3  
 EXREF 77.00 ppm  
 BF 1.00 Hz  
 RGAIN 50

<CO2Bn

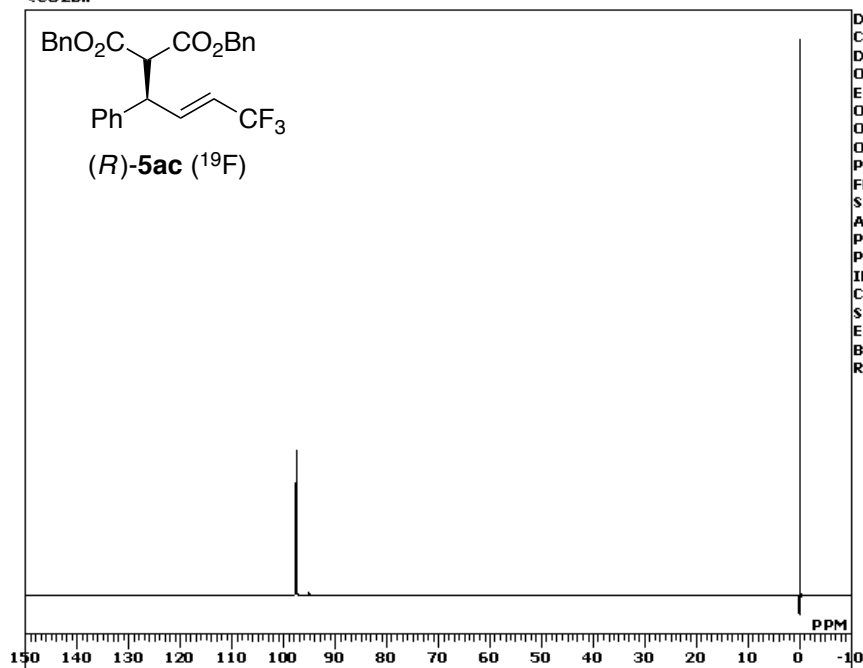

DFILE fCO2Bn\_19F-1-1.als  
 COMNT <CO2Bn  
 DATIM 20-02-2012 16:56:06  
 OBNUC 19F  
 EXMOD single\_pulse.jsp  
 OBFREQ 470.62 MHz  
 OBSET 0.46 KHz  
 OBFIN 0.84 Hz  
 POINT 13107  
 FREQU 192307.69 Hz  
 SCANS 8  
 ACQTM 0.0682 sec  
 PD 5.0000 sec  
 PW1 8.50 usec  
 IRNUC 19F  
 CTEMP 18.9 c  
 SLVNT CDCL3  
 EXREF 0.00 ppm  
 BF 1.00 Hz  
 RGAIN 50

KI-1224-Fr1-Fr1

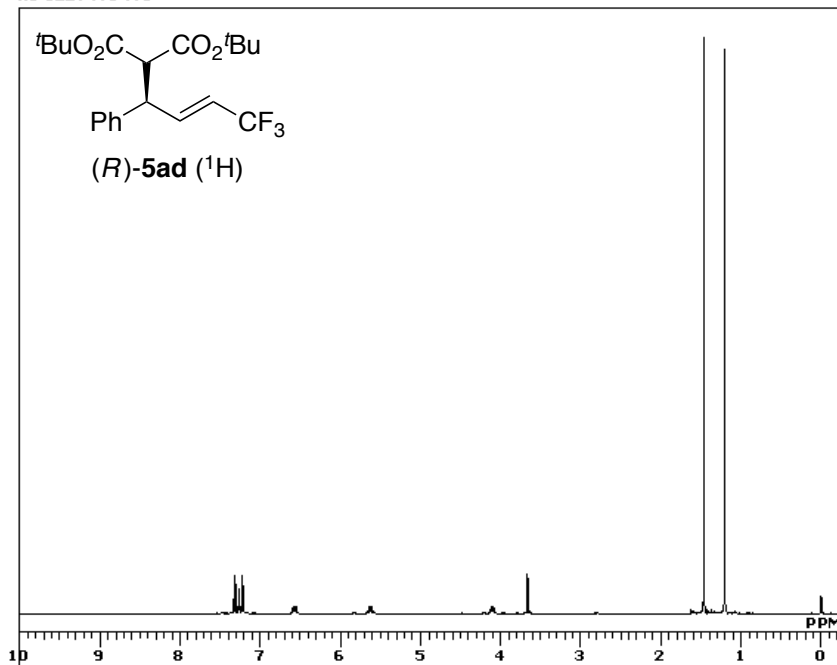

DFILE KI-1224-Fr1-Fr1\_Proto  
 COMNT KI-1224-Fr1-Fr1  
 DATIM 25-01-2012 16:23:50  
 OBNUC 1H  
 EXMOD proton.jsp  
 OBFREQ 500.16 MHz  
 OBSET 2.41 KHz  
 OBFIN 6.01 Hz  
 POINT 26214  
 FREQU 7507.51 Hz  
 SCANS 8  
 ACQTM 3.4918 sec  
 PD 5.0000 sec  
 PW1 6.80 usec  
 IRNUC 1H  
 CTEMP 20.6 c  
 SLVNT CDCL3  
 EXREF 0.00 ppm  
 BF 0.12 Hz  
 RGAIN 34

KI-1224-Fr1-Fr1

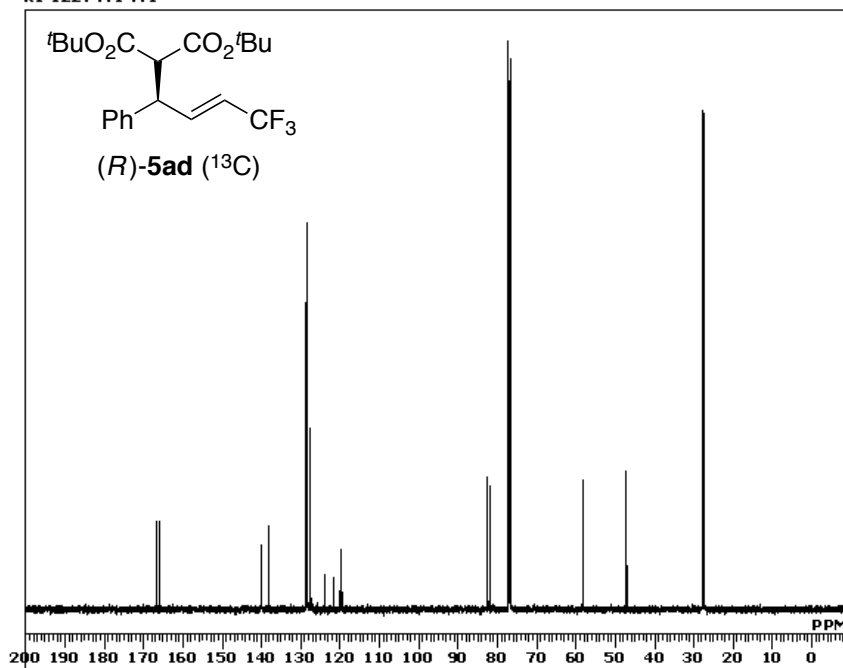

DFILE KI-1224-Fr1-Fr1\_Carbo  
 COMNT KI-1224-Fr1-Fr1  
 DATIM 25-01-2012 16:25:27  
 OBNUC 13C  
 EXMOD carbon.jsp  
 OBFREQ 125.77 MHz  
 OBSET 7.87 KHz  
 OBFIN 4.21 Hz  
 POINT 26214  
 FREQU 31446.54 Hz  
 SCANS 754  
 ACQTM 0.8336 sec  
 PD 2.0000 sec  
 PW1 3.90 usec  
 IRNUC 1H  
 CTEMP 20.9 c  
 SLVNT CDCL3  
 EXREF 77.00 ppm  
 BF 1.00 Hz  
 RGAIN 50

KI-1224-Fr1-Fr1

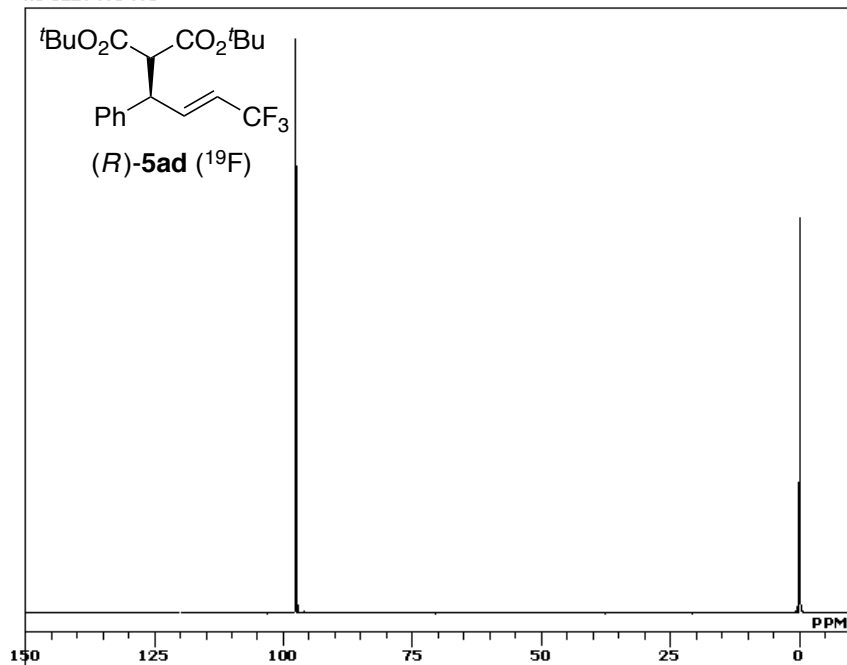

DFILE KI-1224-Fr1-Fr1\_19F-1  
COMNT KI-1224-Fr1-Fr1  
DATIM 25-01-2012 22:25:34  
OBNUC <sup>19</sup>F  
EXMOD single\_pulse.jsp  
OBFRQ 470.62 MHz  
OBSET 0.46 KHz  
OBFIN 0.84 Hz  
POINT 13107  
FREQU 192307.69 Hz  
SCANS 8  
ACQTM 0.0682 sec  
PD 5.0000 sec  
PW1 7.00 usec  
IRNUC <sup>19</sup>F  
CTEMP 20.6 c  
SLVNT CDCL3  
EXREF 0.00 ppm  
BF 0.10 Hz  
RGAIN 50

KI-1146-Fr1-Fr1-Fr1

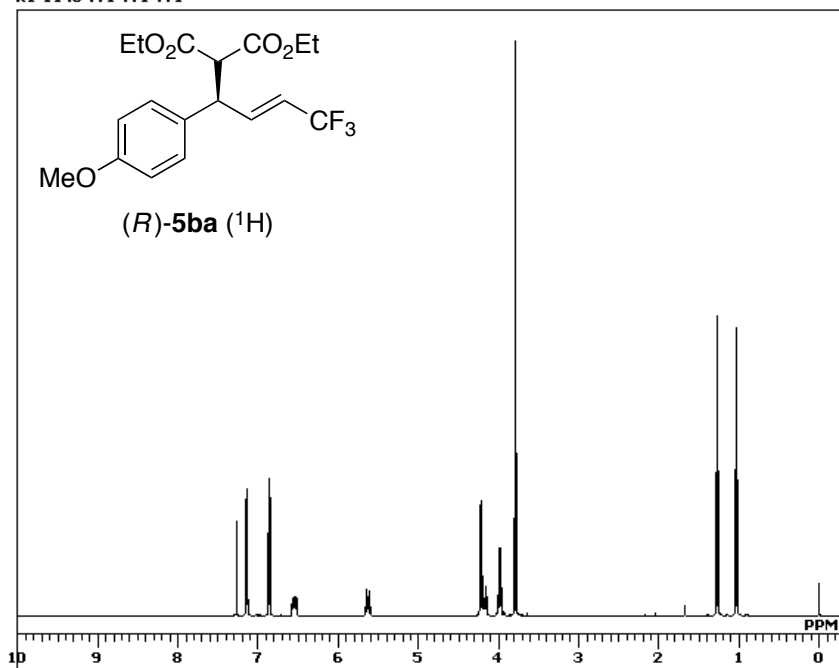

DFILE KI-1146-Fr1-Fr1-Fr1\_P1  
COMNT KI-1146-Fr1-Fr1-Fr1  
DATIM 23-01-2012 23:03:17  
OBNUC <sup>1</sup>H  
EXMOD proton.jsp  
OBFRQ 500.16 MHz  
OBSET 2.41 KHz  
OBFIN 6.01 Hz  
POINT 26214  
FREQU 7507.51 Hz  
SCANS 4  
ACQTM 3.4918 sec  
PD 5.0000 sec  
PW1 6.80 usec  
IRNUC <sup>1</sup>H  
CTEMP 21.2 c  
SLVNT CDCL3  
EXREF 0.00 ppm  
BF 0.10 Hz  
RGAIN 32

KI-1146-Fr1-Fr1-Fr1

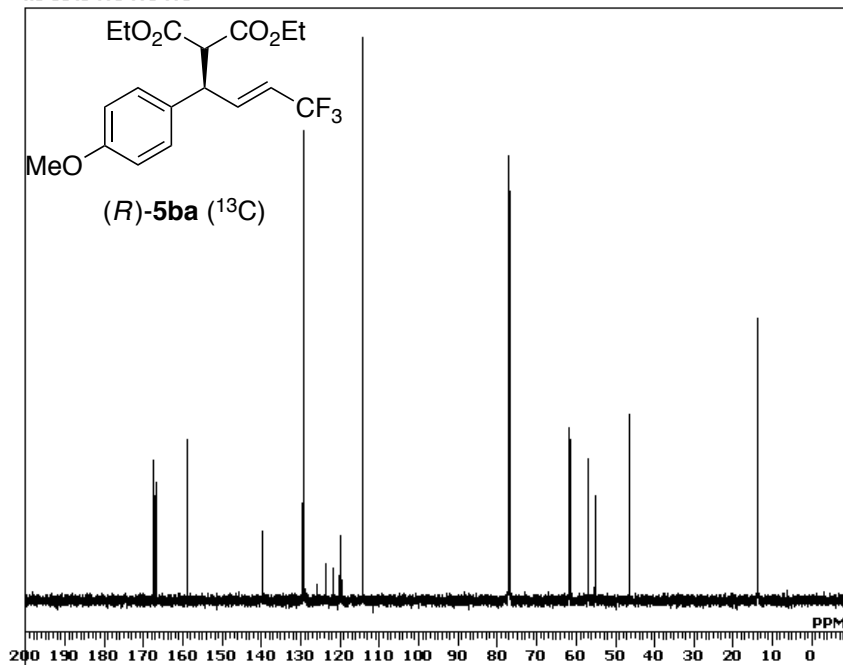

DFILE KI-1146-Fr1-Fr1-Fr1\_C  
COMNT KI-1146-Fr1-Fr1-Fr1  
DATIM 23-01-2012 23:04:15  
OBNUC 13C  
EXMOD carbon.jsp  
OBFRQ 125.77 MHz  
OBSET 7.87 KHz  
OBFIN 4.21 Hz  
POINT 26214  
FREQU 31446.54 Hz  
SCANS 167  
ACQTM 0.8336 sec  
PD 2.0000 sec  
PW1 3.90 usec  
IRNUC 1H  
CTEMP 21.5 c  
SLVNT CDCL3  
EXREF 77.00 ppm  
BF 1.00 Hz  
RGAIN 50

p-OMe-Ph\_14oCO2Et

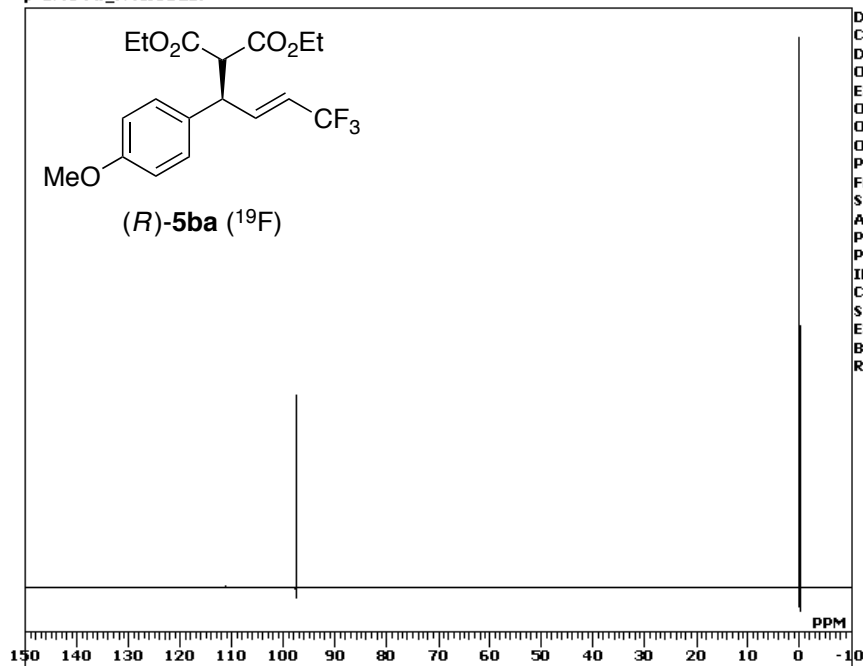

DFILE p-OMe-Ph\_14oCO2Et\_1!  
COMNT p-OMe-Ph\_14oCO2Et  
DATIM 20-02-2012 17:13:58  
OBNUC 19F  
EXMOD single\_pulse.jsp  
OBFRQ 470.62 MHz  
OBSET 0.46 KHz  
OBFIN 0.84 Hz  
POINT 13107  
FREQU 192307.69 Hz  
SCANS 8  
ACQTM 0.0682 sec  
PD 5.0000 sec  
PW1 8.50 usec  
IRNUC 19F  
CTEMP 18.9 c  
SLVNT CDCL3  
EXREF 0.00 ppm  
BF 0.00 Hz  
RGAIN 50

KI-1145-Fr1-Fr1

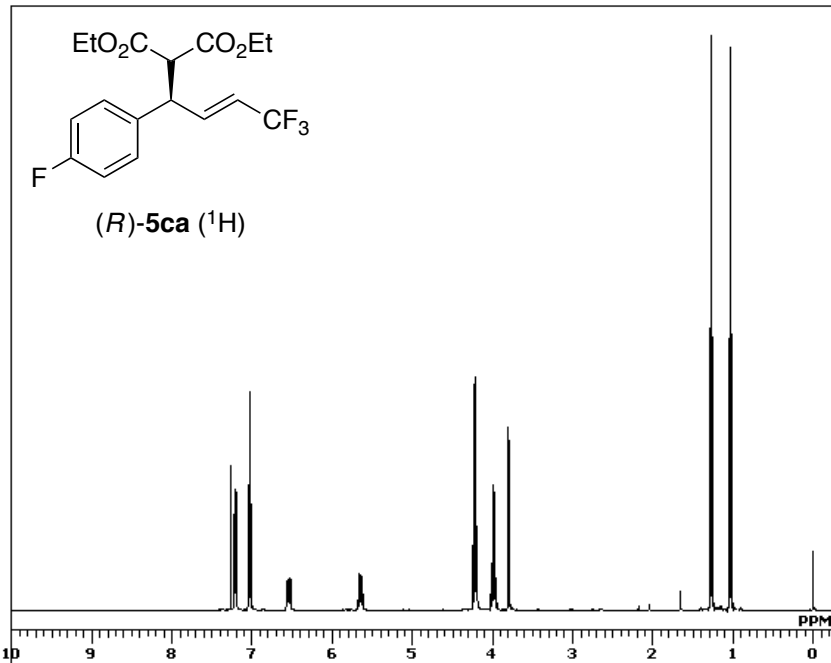

DFILE KI-1145-Fr1-Fr1\_Proto  
COMNT KI-1145-Fr1-Fr1  
DATIM 23-01-2012 22:43:33  
OBNUC 1H  
EXMOD proton.jsp  
OBFRQ 500.16 MHz  
OBSET 2.41 KHz  
OBFIN 6.01 Hz  
POINT 26214  
FREQU 7507.51 Hz  
SCANS 4  
ACQTM 3.4918 sec  
PD 5.0000 sec  
PW1 6.80 usec  
IRNUC 1H  
CTEMP 21.3 c  
SLVNT CDCL3  
EXREF 0.00 ppm  
BF 0.10 Hz  
RGAIN 34

KI-1145-Fr1-Fr1

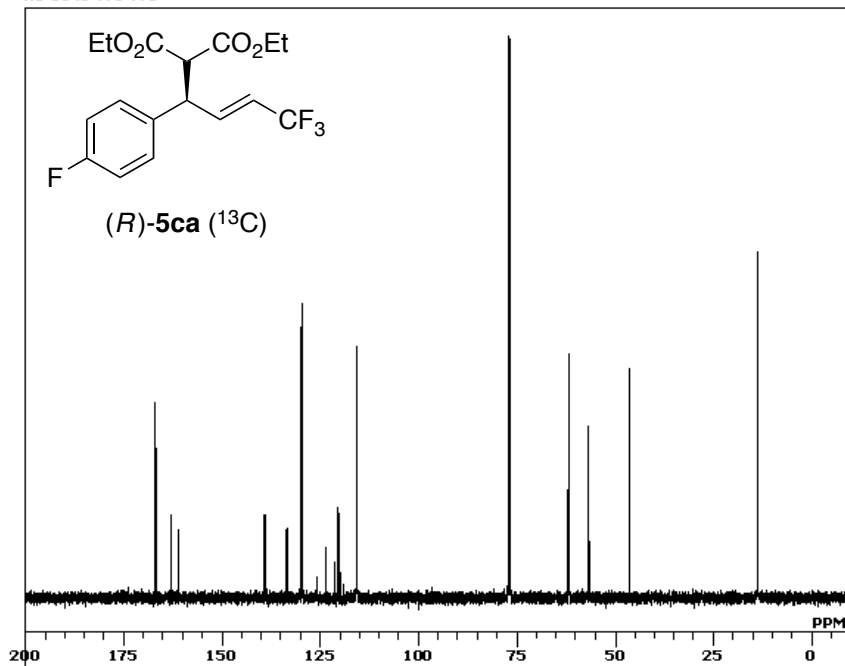

DFILE KI-1145-Fr1-Fr1\_Carbo  
COMNT KI-1145-Fr1-Fr1  
DATIM 23-01-2012 22:44:33  
OBNUC 13C  
EXMOD carbon.jsp  
OBFRQ 125.77 MHz  
OBSET 7.87 KHz  
OBFIN 4.21 Hz  
POINT 26214  
FREQU 31446.54 Hz  
SCANS 277  
ACQTM 0.8336 sec  
PD 2.0000 sec  
PW1 3.90 usec  
IRNUC 1H  
CTEMP 21.5 c  
SLVNT CDCL3  
EXREF 77.00 ppm  
BF 1.00 Hz  
RGAIN 50



p-F-Ph\_<CO2Et

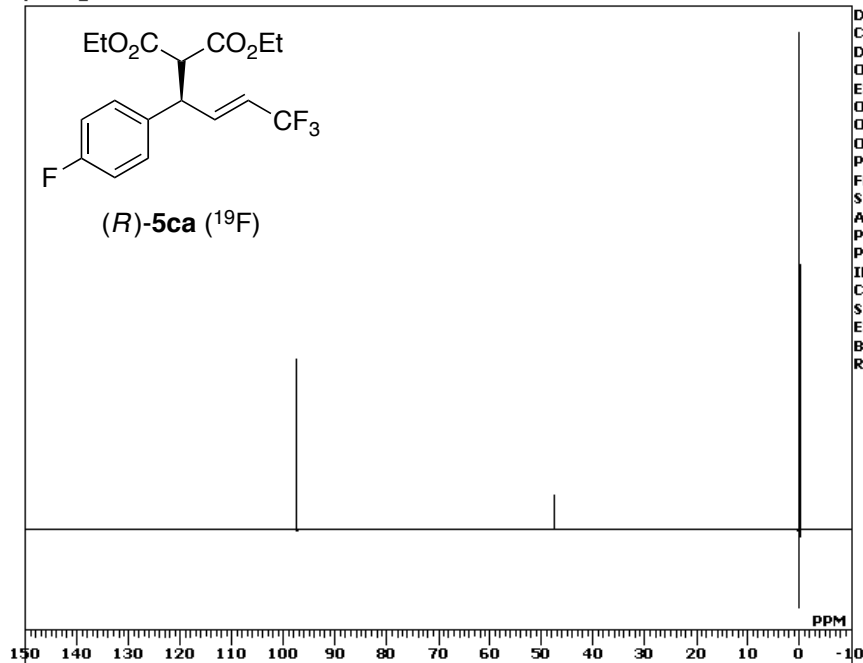

DFILE p-F-Ph\_<fCO2Et\_19F-1  
COMNT p-F-Ph\_<CO2Et  
DATIM 20-02-2012 17:02:00  
OBNUC 19F  
EXMOD single\_pulse.jsp  
OBFRQ 470.62 MHz  
OBSET 0.46 KHz  
OBFIN 0.84 Hz  
POINT 13107  
FREQU 192307.69 Hz  
SCANS 8  
ACQTM 0.0682 sec  
PD 5.0000 sec  
PW1 8.50 usec  
IRNUC 19F  
CTEMP 18.9 c  
SLVNT CDCL3  
EXREF 0.00 ppm  
BF 0.00 Hz  
RGAIN 50

KI-924-Fr1

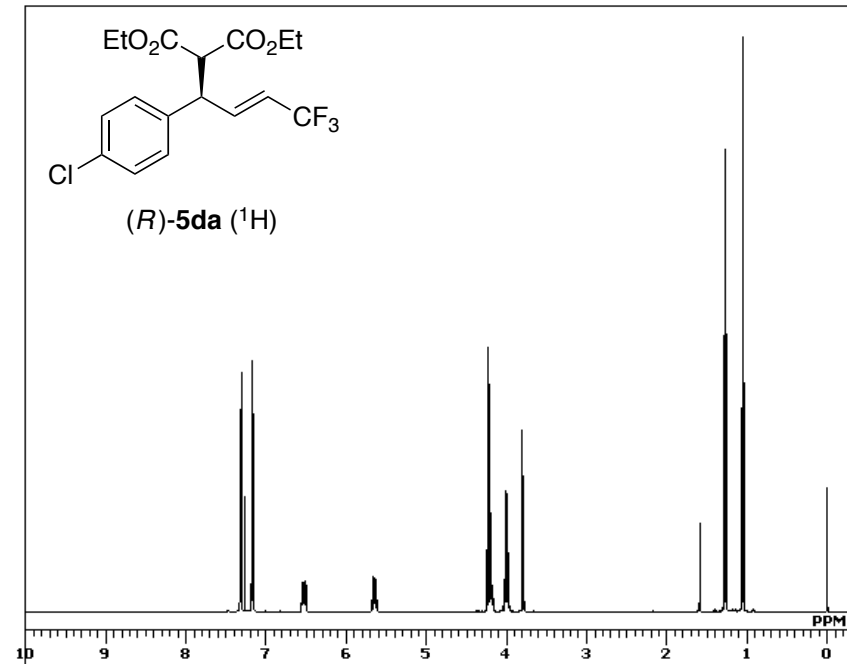

DFILE KI-924-Fr1\_Proton-1-1.  
COMNT KI-924-Fr1  
DATIM 14-07-2011 19:48:42  
OBNUC 1H  
EXMOD proton.jsp  
OBFRQ 500.16 MHz  
OBSET 2.41 KHz  
OBFIN 6.01 Hz  
POINT 13107  
FREQU 7507.51 Hz  
SCANS 4  
ACQTM 1.7459 sec  
PD 5.0000 sec  
PW1 6.80 usec  
IRNUC 1H  
CTEMP 24.5 c  
SLVNT CDCL3  
EXREF 0.00 ppm  
BF 0.10 Hz  
RGAIN 36

KI-1148-Fr1-Fr1

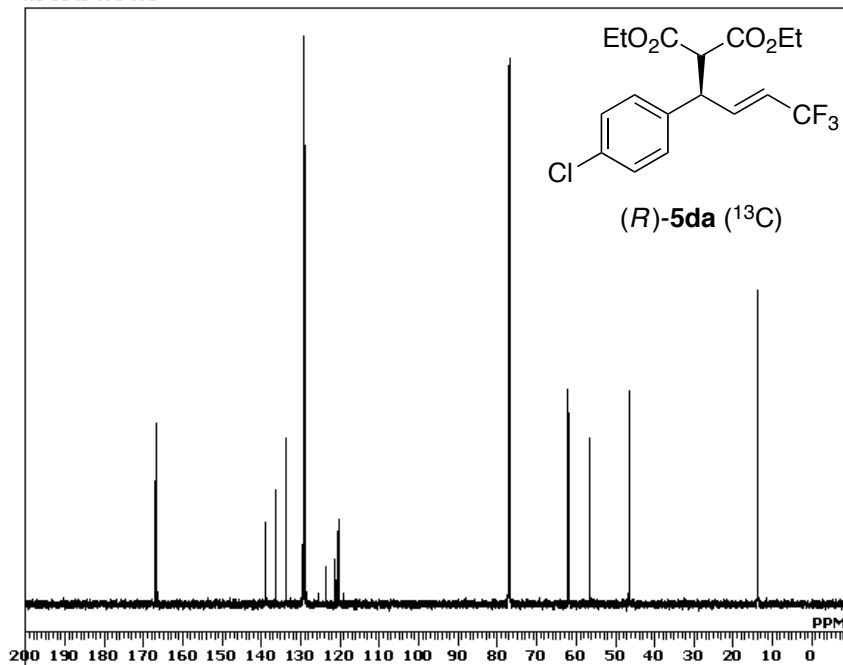

DFILE KI-1148-Fr1-Fr1\_Carbo  
COMNT KI-1148-Fr1-Fr1  
DATIM 25-01-2012 19:27:28  
OBNUC 13C  
EXMOD carbon.jsp  
OBFRQ 125.77 MHz  
OBSET 7.87 KHz  
OBFIN 4.21 Hz  
POINT 26214  
FREQU 31446.54 Hz  
SCANS 512  
ACQTM 0.8336 sec  
PD 2.0000 sec  
PW1 3.90 usec  
IRNUC 1H  
CTEMP 20.8 c  
SLVNT CDCL3  
EXREF 77.00 ppm  
BF 1.00 Hz  
RGAIN 50

KI-1148-Fr1-Fr1

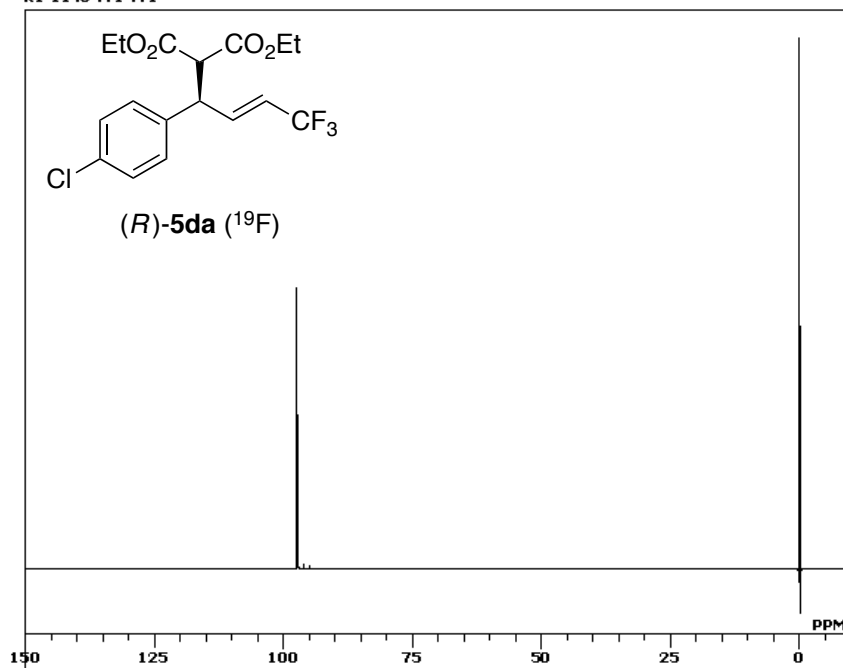

DFILE KI-1148-Fr1-Fr1\_19F-1  
COMNT KI-1148-Fr1-Fr1  
DATIM 25-01-2012 22:22:11  
OBNUC 19F  
EXMOD single\_pulse.jsp  
OBFRQ 470.62 MHz  
OBSET 0.46 KHz  
OBFIN 0.84 Hz  
POINT 13107  
FREQU 192307.69 Hz  
SCANS 8  
ACQTM 0.0682 sec  
PD 5.0000 sec  
PW1 7.00 usec  
IRNUC 19F  
CTEMP 20.6 c  
SLVNT CDCL3  
EXREF 0.00 ppm  
BF 0.10 Hz  
RGAIN 50

KI-1216-Fr1-Fr1

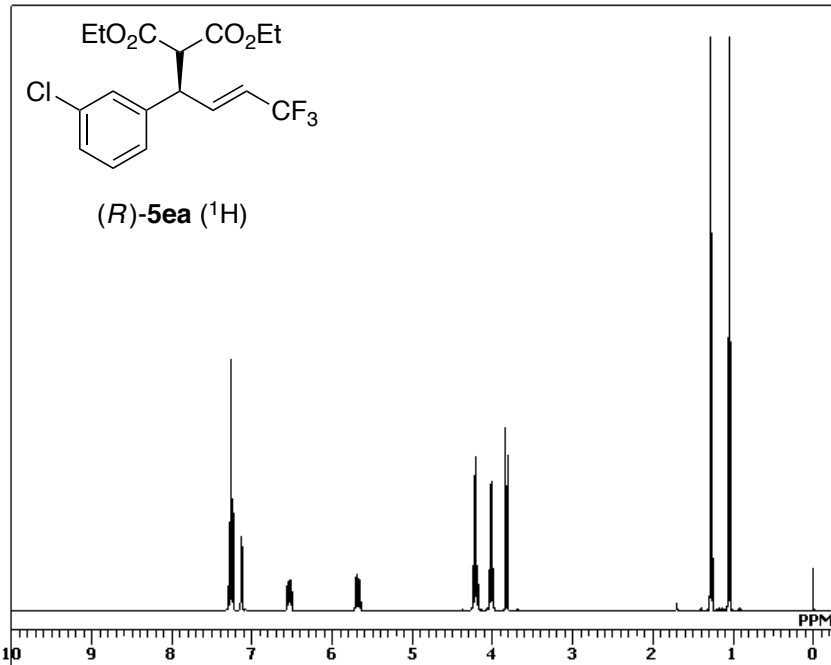

DFILE KI-1216-Fr1-Fr1\_Proton  
COMNT KI-1216-Fr1-Fr1  
DATIM 23-02-2012 08:50:60  
OBNUC 1H  
EXMOD proton.jxp  
OBFREQ 500.16 MHz  
OBSET 2.41 KHz  
OBFIN 6.01 Hz  
POINT 26214  
FREQU 7507.51 Hz  
SCANS 8  
ACQTM 3.4918 sec  
PD 5.0000 sec  
PW1 7.00 usec  
IRNUC 1H  
CTEMP 20.1 c  
SLVNT CDCL3  
EXREF 0.00 ppm  
BF 0.10 Hz  
RGAIN 28

KI-1216-Fr1-Fr1

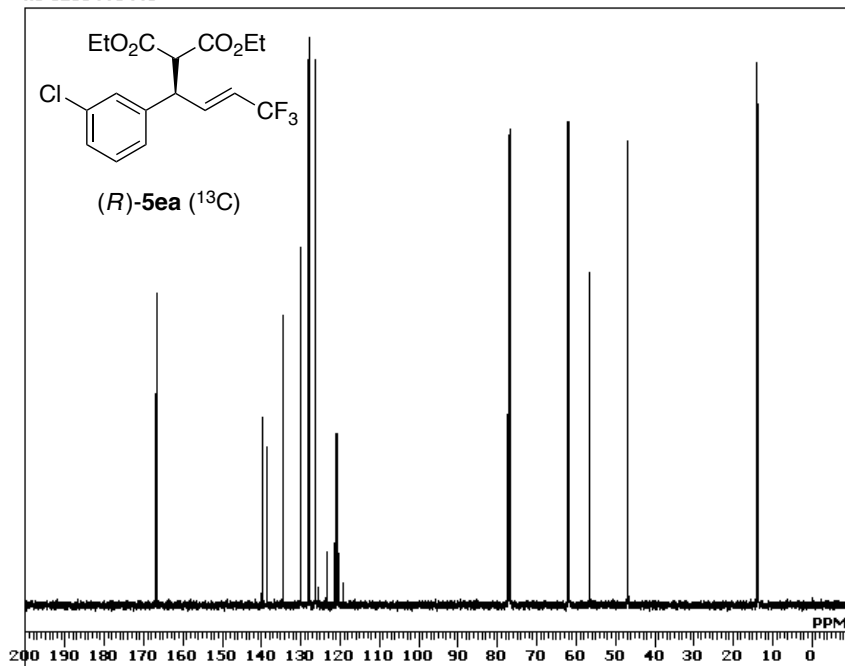

DFILE KI-1216-Fr1-Fr1\_Carbon  
COMNT KI-1216-Fr1-Fr1  
DATIM 23-02-2012 08:52:32  
OBNUC 13C  
EXMOD carbon.jxp  
OBFREQ 125.77 MHz  
OBSET 7.87 KHz  
OBFIN 4.21 Hz  
POINT 26214  
FREQU 31446.54 Hz  
SCANS 256  
ACQTM 0.8336 sec  
PD 2.0000 sec  
PW1 3.90 usec  
IRNUC 1H  
CTEMP 20.8 c  
SLVNT CDCL3  
EXREF 77.00 ppm  
BF 1.00 Hz  
RGAIN 50

KI-1262-Fr1

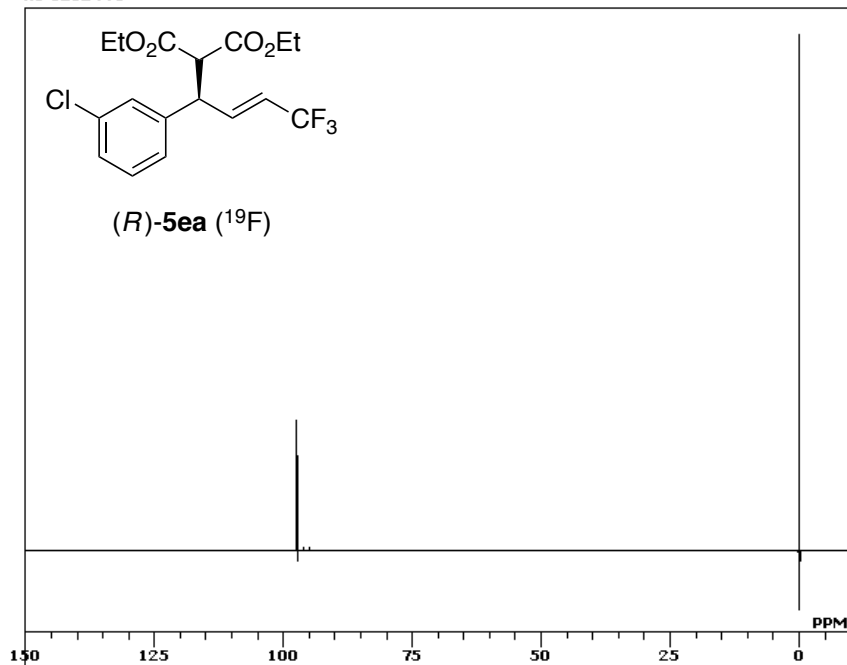

DFILE KI-1262-Fr1\_19F-1-1.al  
COMNT KI-1262-Fr1  
DATIM 24-01-2012 20:39:19  
OBNUC 19F  
EXMOD single\_pulse.jsp  
OBFRQ 470.62 MHz  
OBSET 0.46 KHz  
OBFIN 0.84 Hz  
POINT 13107  
FREQU 192307.69 Hz  
SCANS 8  
ACQTM 0.0682 sec  
PD 5.0000 sec  
PW1 7.00 usec  
IRNUC 19F  
CTEMP 21.2 c  
SLVNT CDCL3  
EXREF 0.00 ppm  
BF 0.10 Hz  
RGAIN 50

KI-1164-Fr1

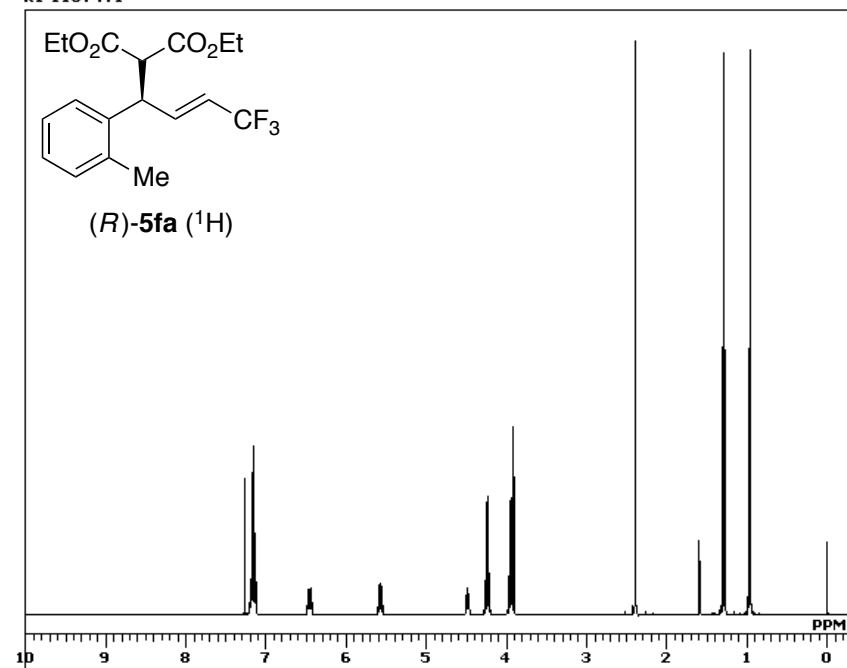

DFILE KI-1153-Fr1\_Proton-1-  
COMNT KI-1164-Fr1  
DATIM 20-12-2011 19:02:20  
OBNUC 1H  
EXMOD proton.jsp  
OBFRQ 500.16 MHz  
OBSET 2.41 KHz  
OBFIN 6.01 Hz  
POINT 26214  
FREQU 7507.51 Hz  
SCANS 4  
ACQTM 3.4918 sec  
PD 5.0000 sec  
PW1 6.80 usec  
IRNUC 1H  
CTEMP 21.0 c  
SLVNT CDCL3  
EXREF 0.00 ppm  
BF 0.10 Hz  
RGAIN 38

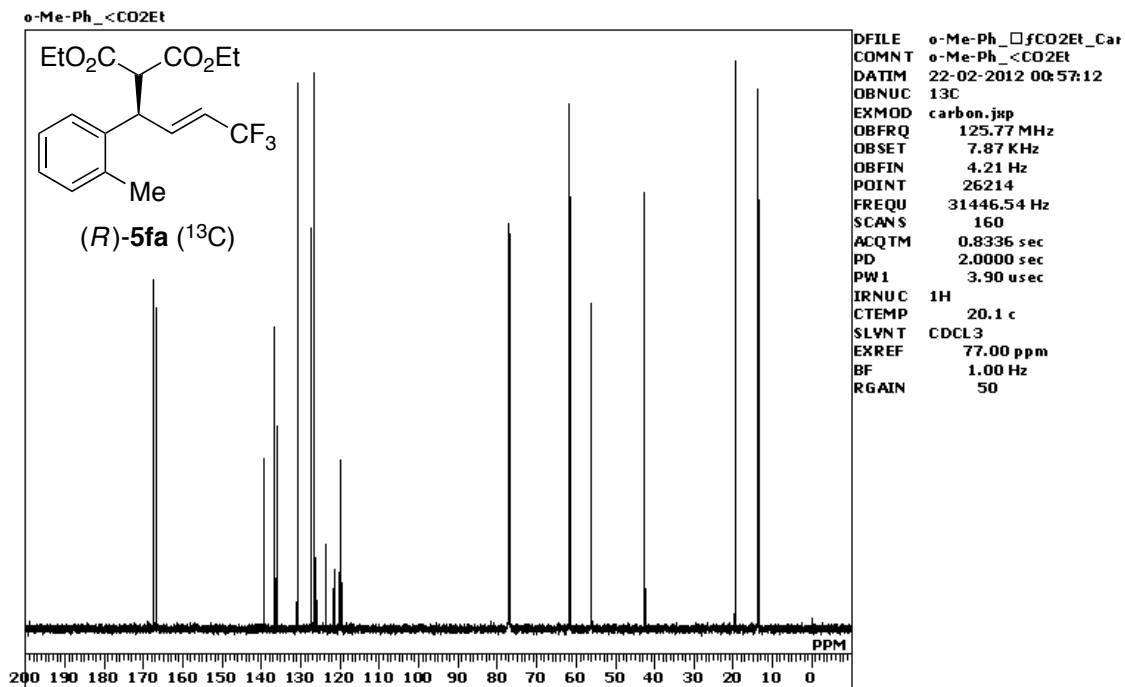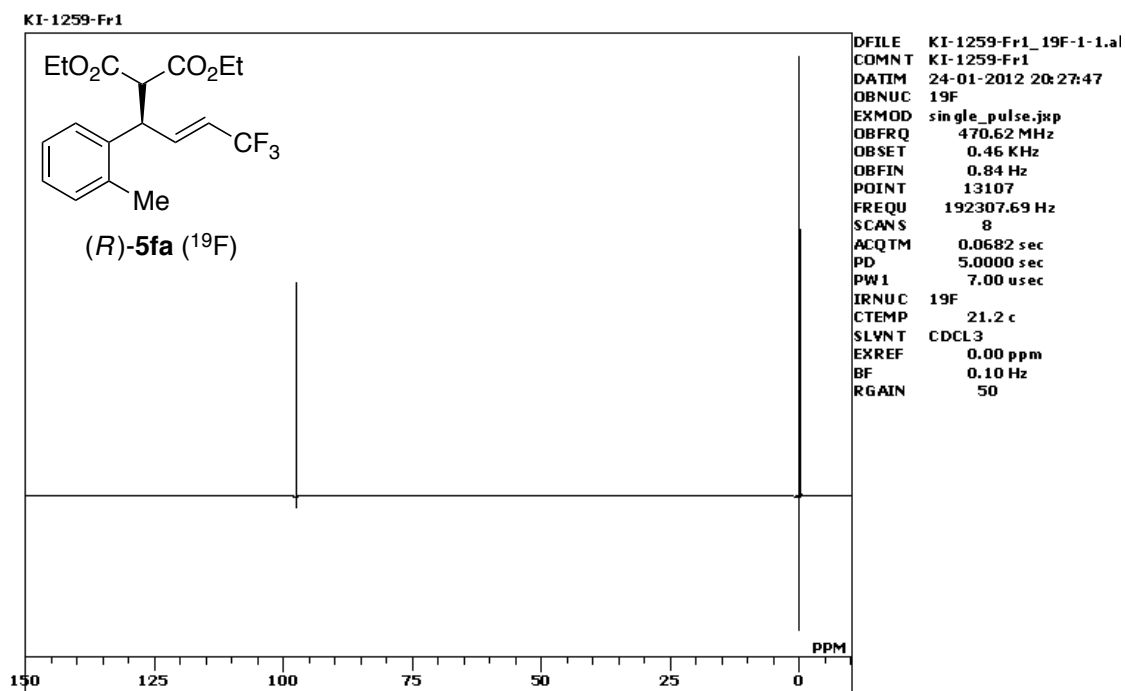

naphtyl\_i%aeCO2Et

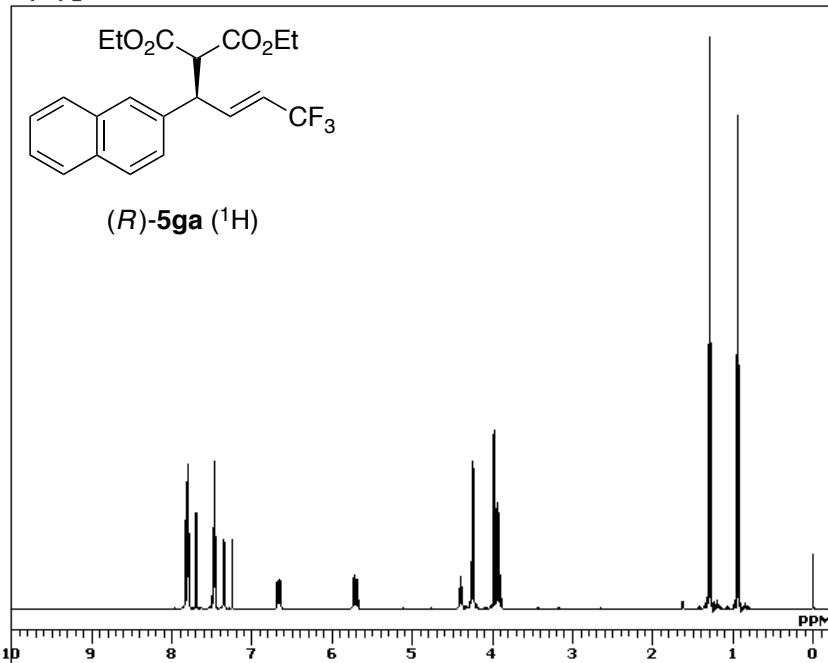

DFILE n aphtyl\_ fCO2Et\_Prot  
COMNT n aphtyl\_i%aeCO2Et  
DATIM 20-02-2012 17:24:57  
OBNUC 1H  
EXMOD proton.jsp  
OBFRQ 500.16 MHz  
OBSET 2.41 KHz  
OBFIN 6.01 Hz  
POINT 26214  
FREQU 7507.51 Hz  
SCANS 8  
ACQTM 3.4918 sec  
PD 5.0000 sec  
PW1 7.00 usec  
IRNUC 1H  
CTEMP 18.9 c  
SLVNT CDCL3  
EXREF 0.00 ppm  
BF 0.10 Hz  
RGAIN 30

naphtyl\_<CO2Et

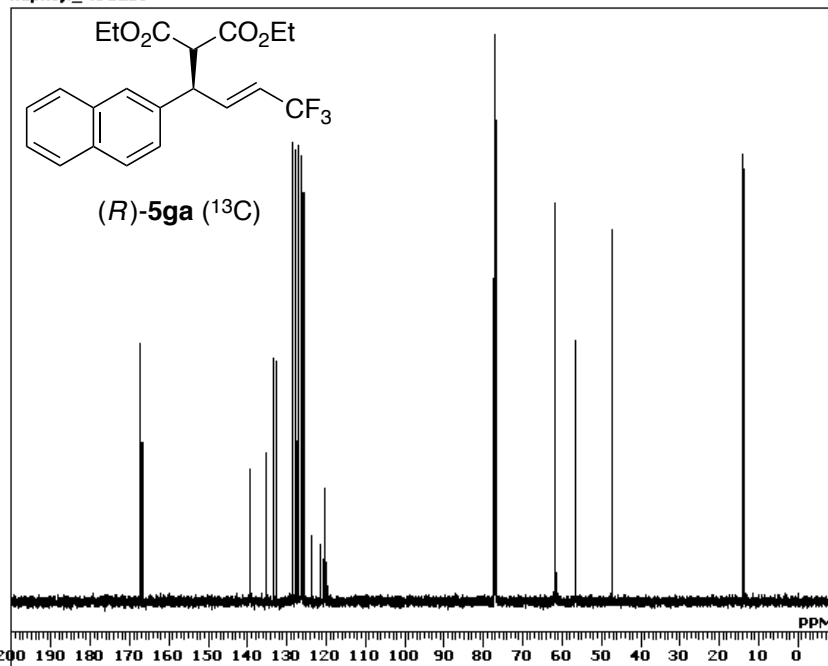

DFILE n aphtyl\_ fCO2Et\_Cart  
COMNT n aphtyl\_<CO2Et  
DATIM 22-02-2012 01:11:58  
OBNUC 13C  
EXMOD carbon.jsp  
OBFRQ 125.77 MHz  
OBSET 7.87 KHz  
OBFIN 4.21 Hz  
POINT 26214  
FREQU 31446.54 Hz  
SCANS 236  
ACQTM 0.8336 sec  
PD 2.0000 sec  
PW1 3.90 usec  
IRNUC 1H  
CTEMP 20.2 c  
SLVNT CDCL3  
EXREF 77.00 ppm  
BF 1.00 Hz  
RGAIN 50

naphtyl\_<CO2Et

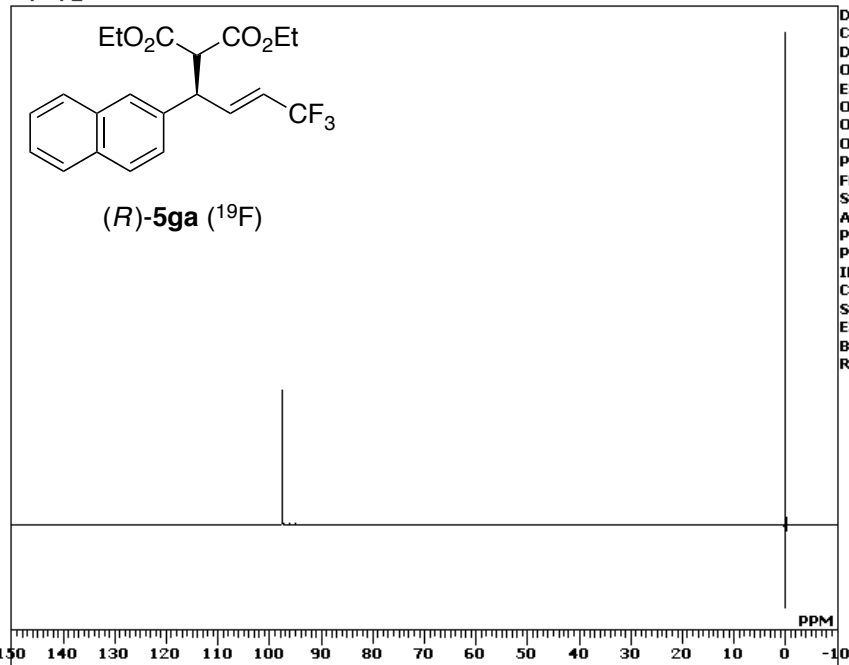

DFILE naphtyl\_<CO2Et\_19F-  
COMNT naphtyl\_<CO2Et  
DATIM 20-02-2012 17:20:20  
OBNUC 19F  
EXMOD single\_pulse.jxp  
OBFREQ 470.62 MHz  
OBSET 0.46 KHz  
OBFIN 0.84 Hz  
POINT 13107  
FREQU 192307.69 Hz  
SCANS 8  
ACQTM 0.0682 sec  
PD 5.0000 sec  
PW1 8.50 usec  
IRNUC 19F  
CTEMP 18.9 c  
SLVNT CDCL3  
EXREF 0.00 ppm  
BF 0.00 Hz  
RGAIN 50

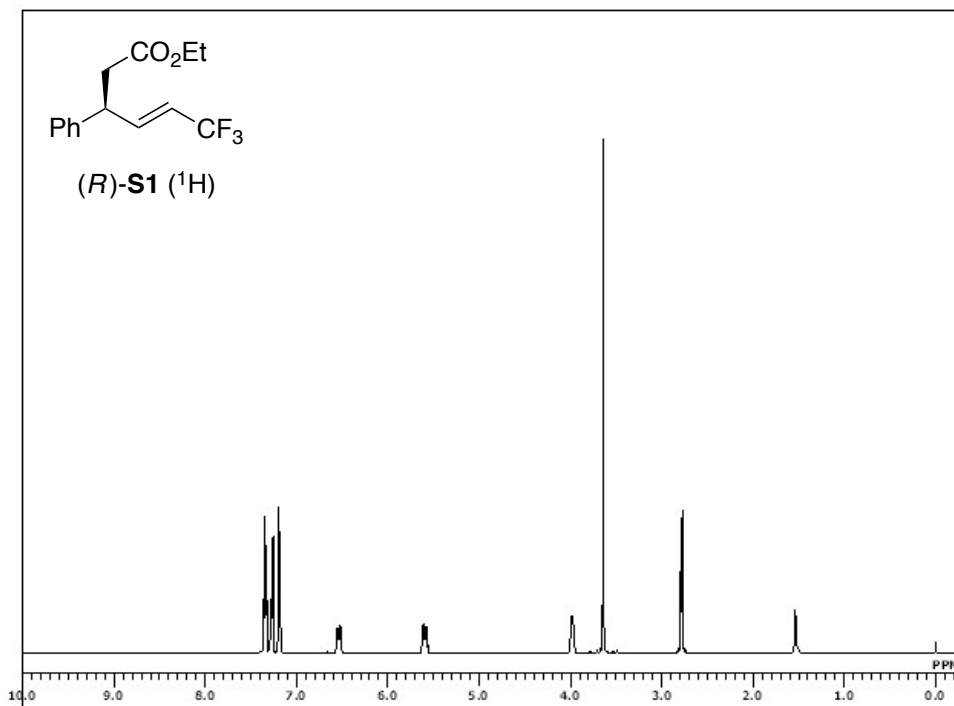

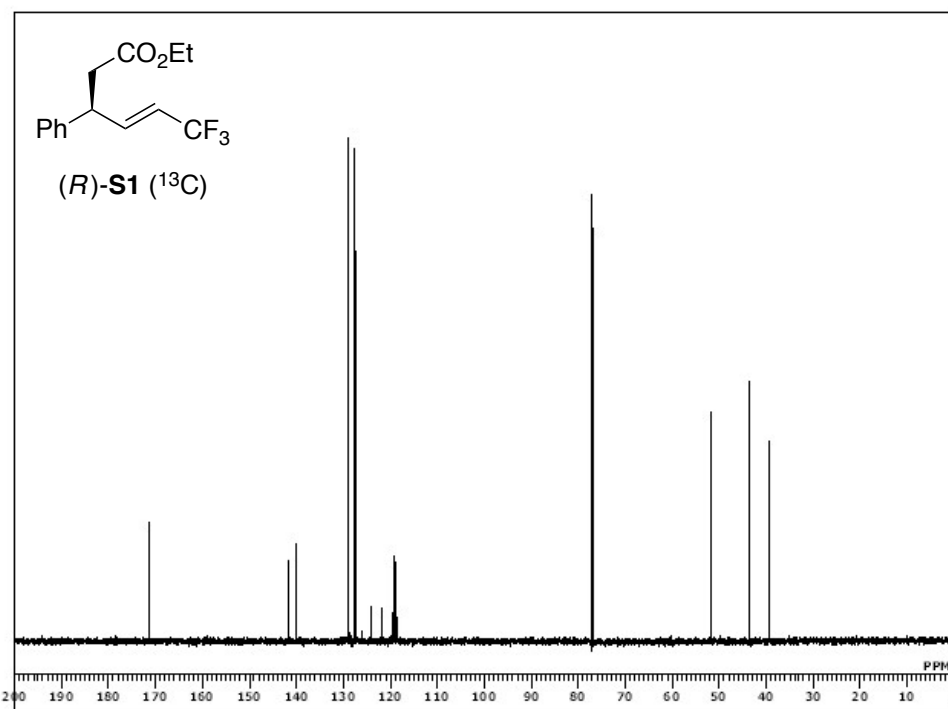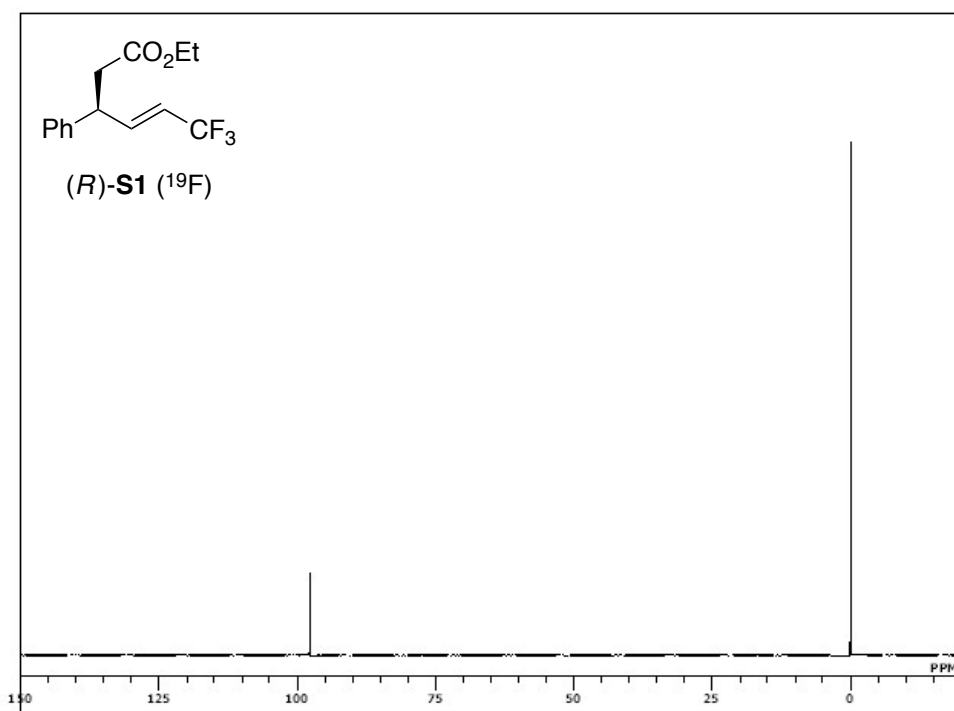



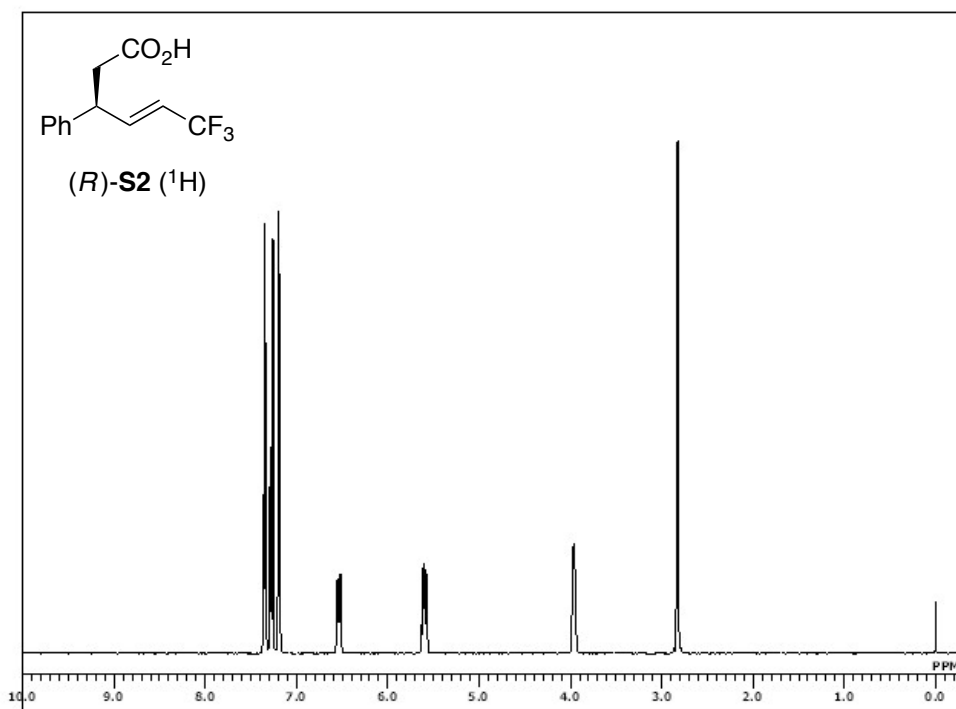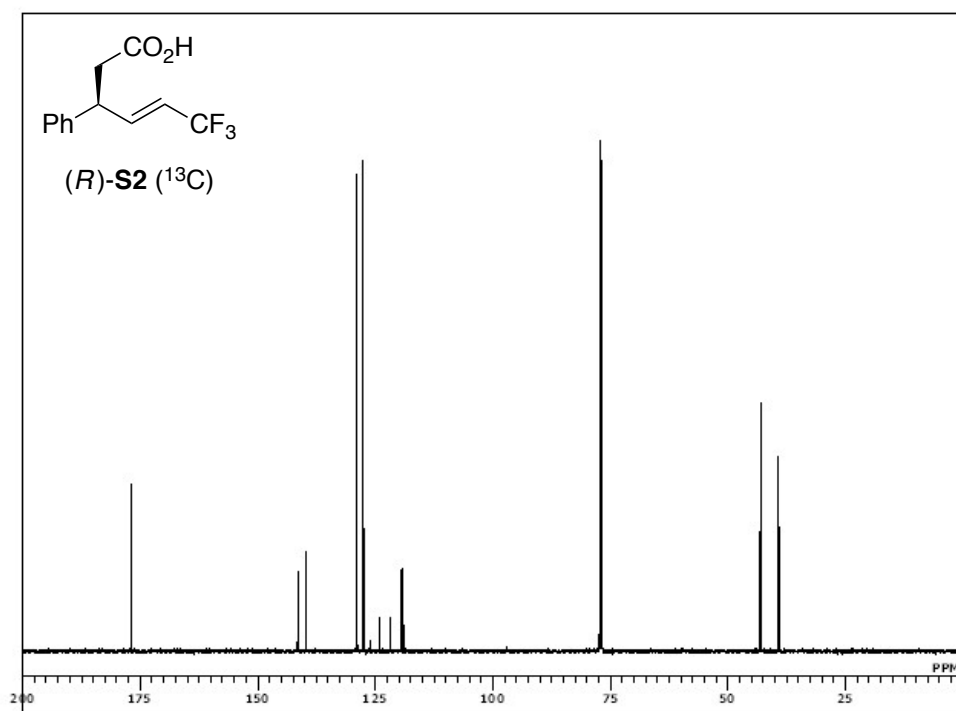

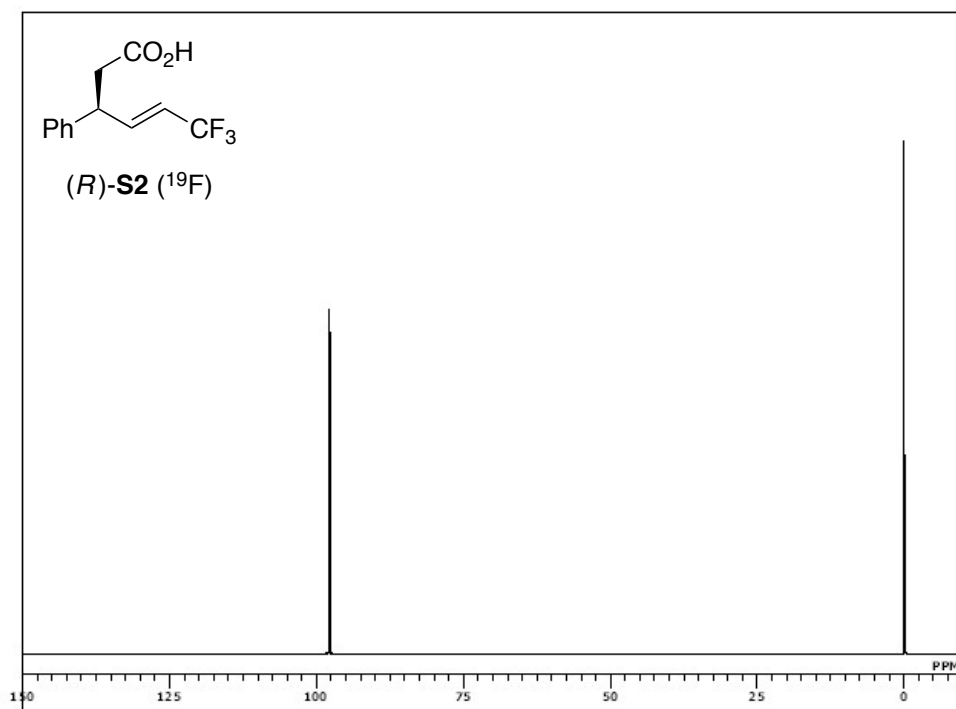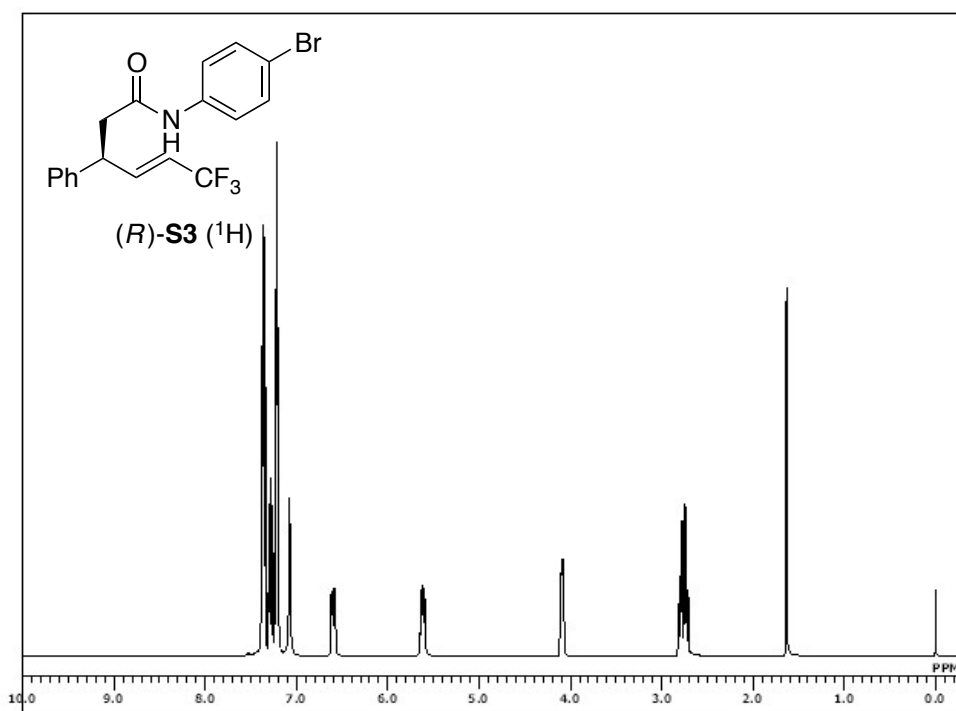

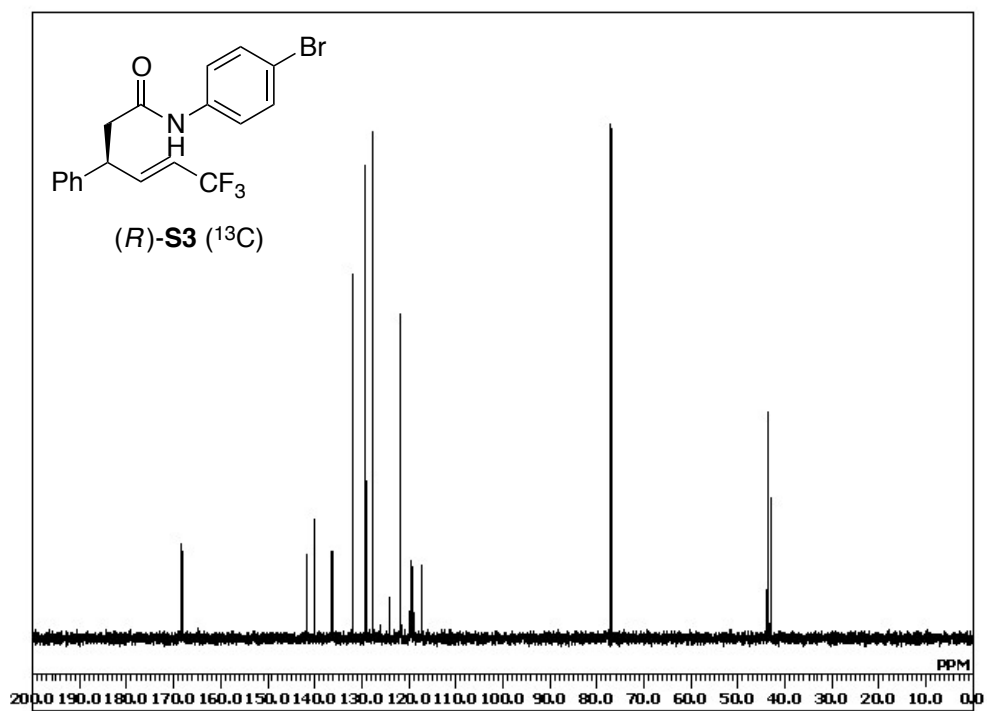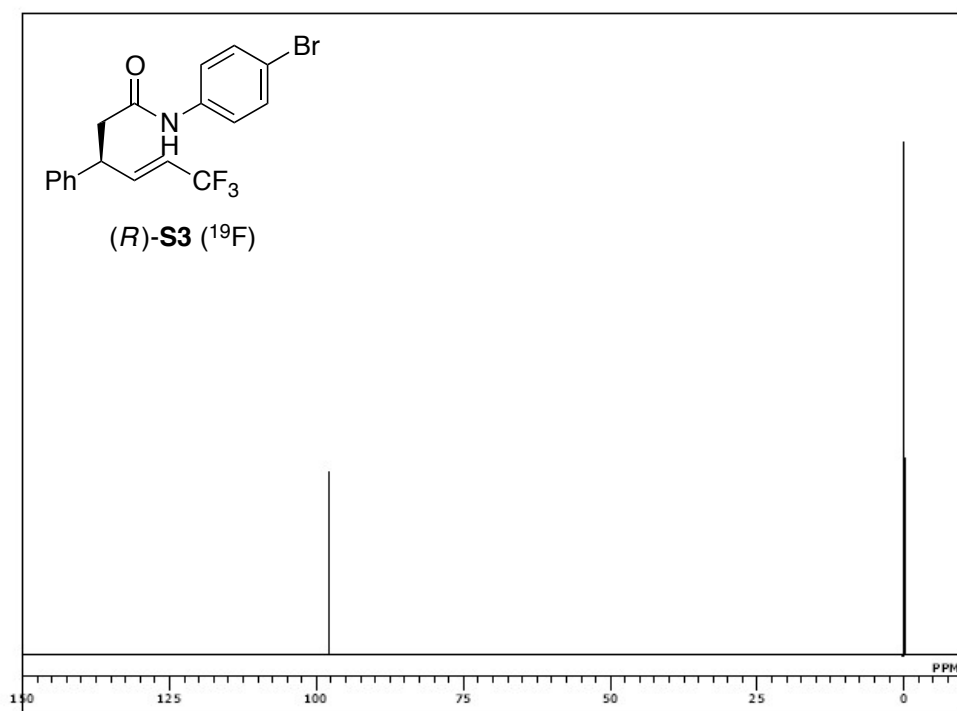

Copies of chiral HPLC chart of products

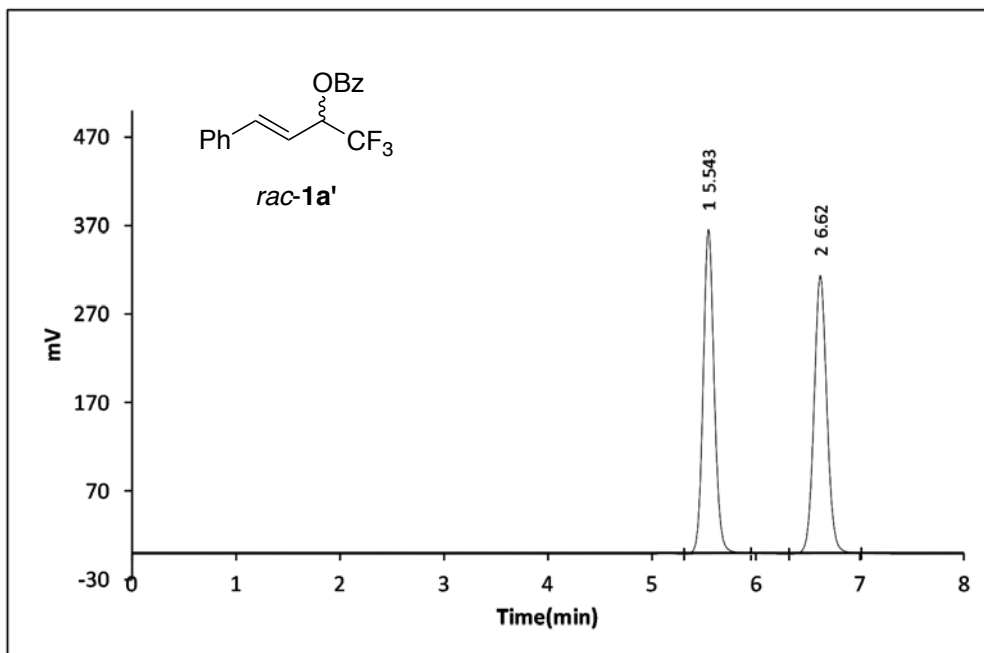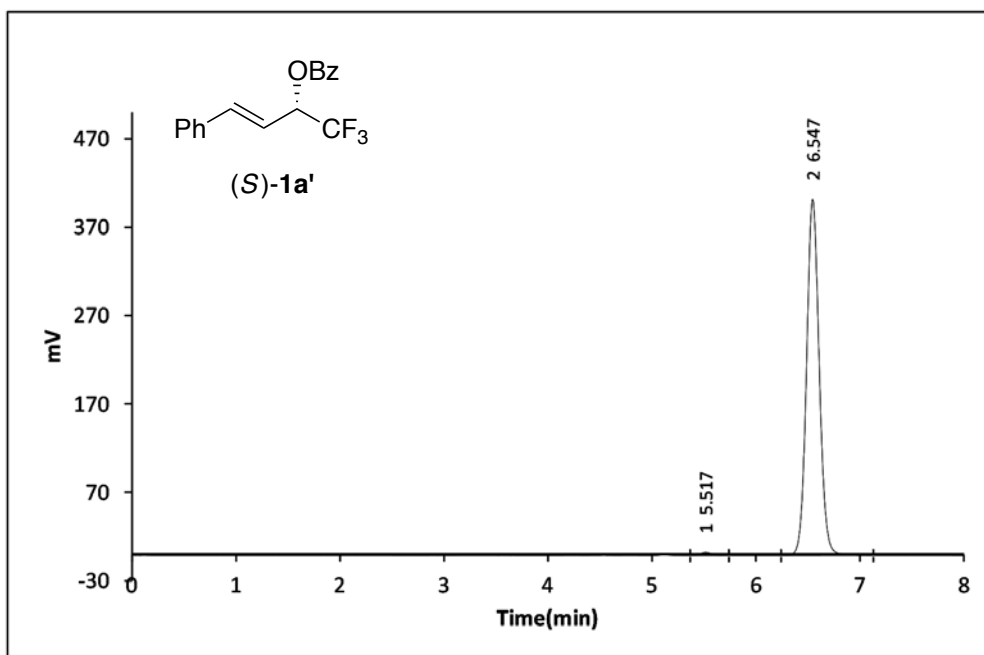

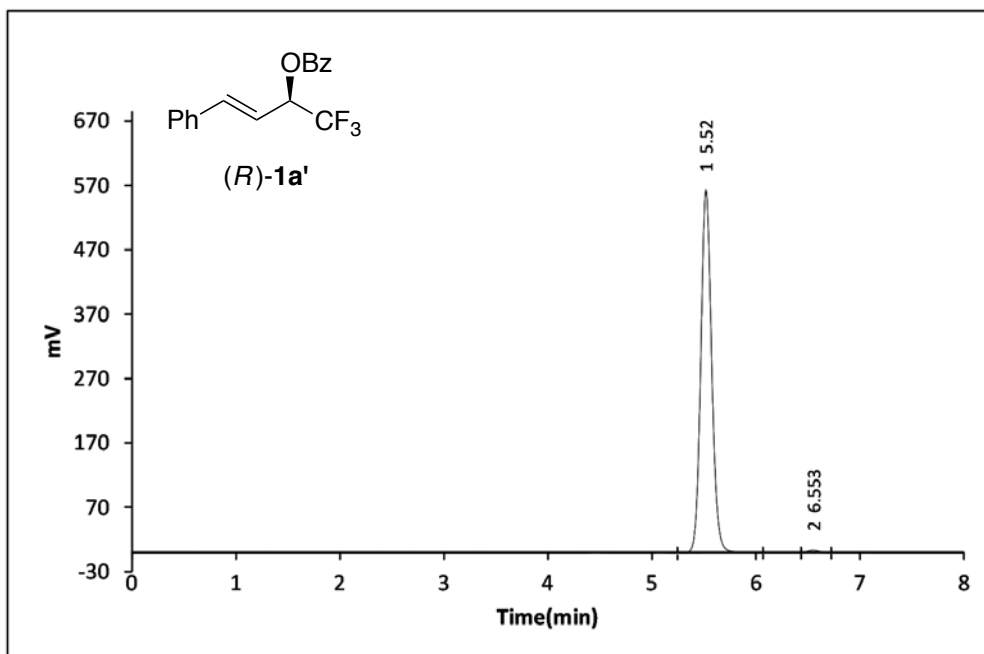

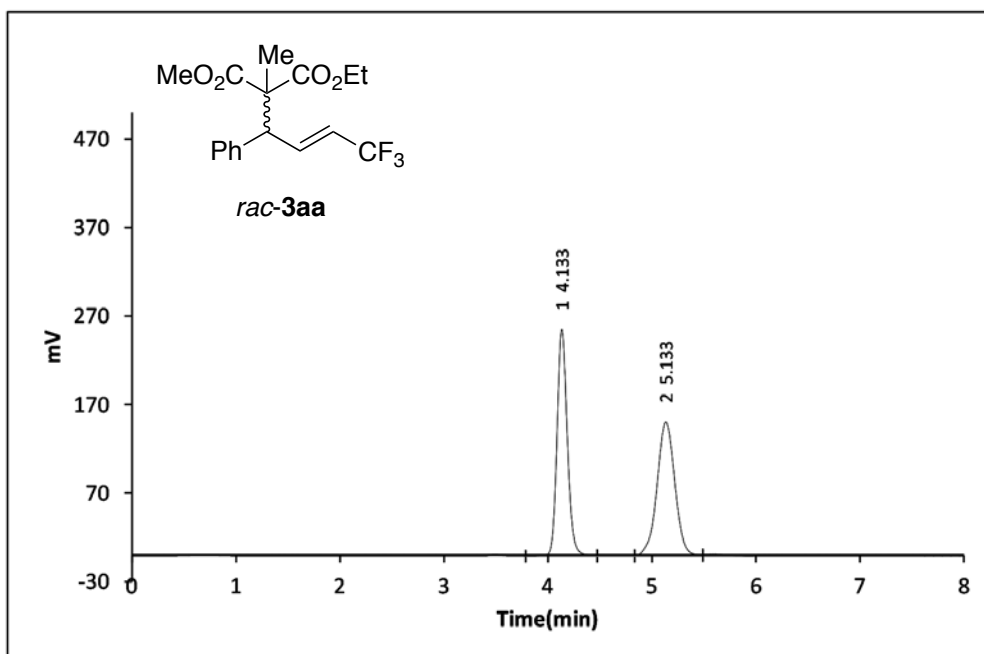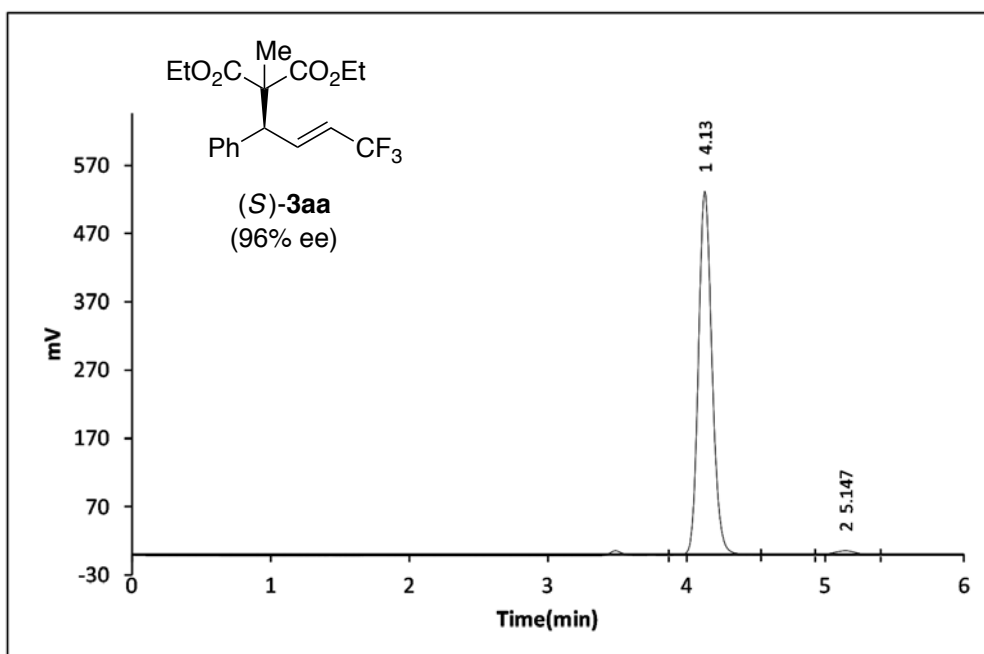

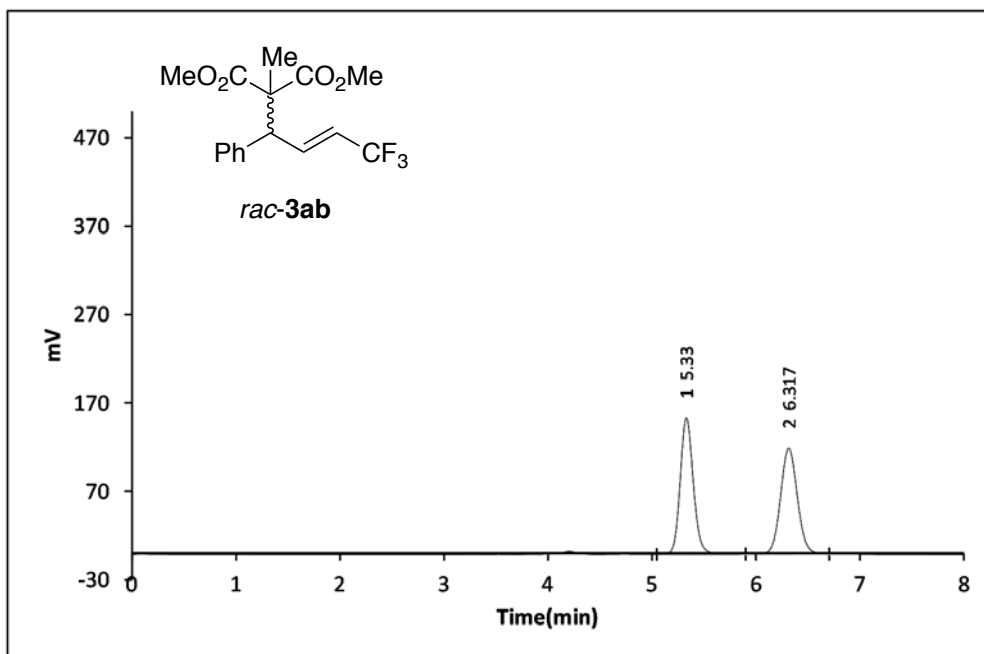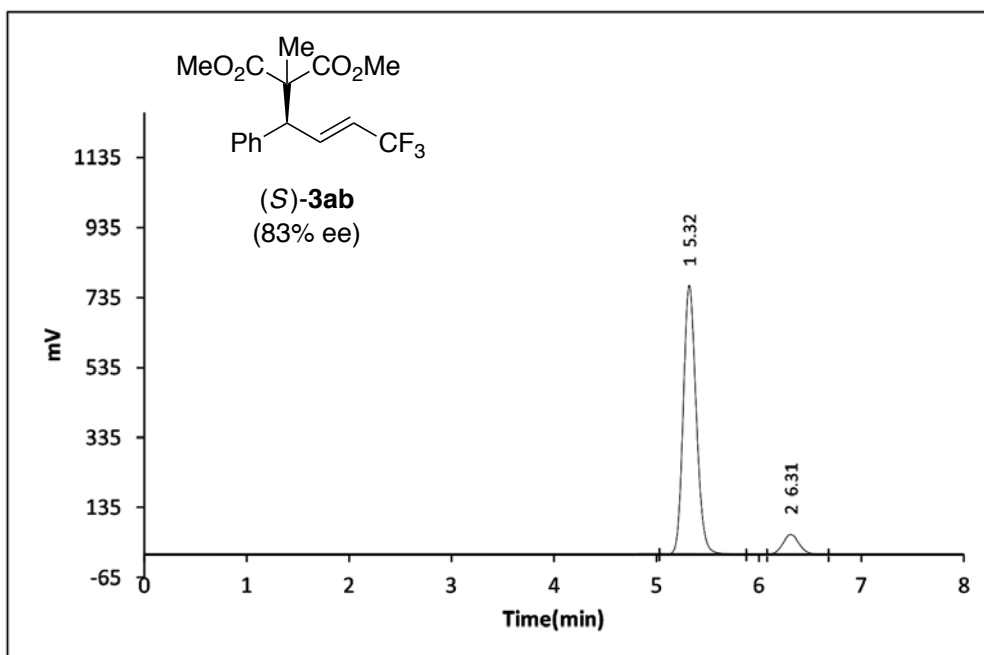

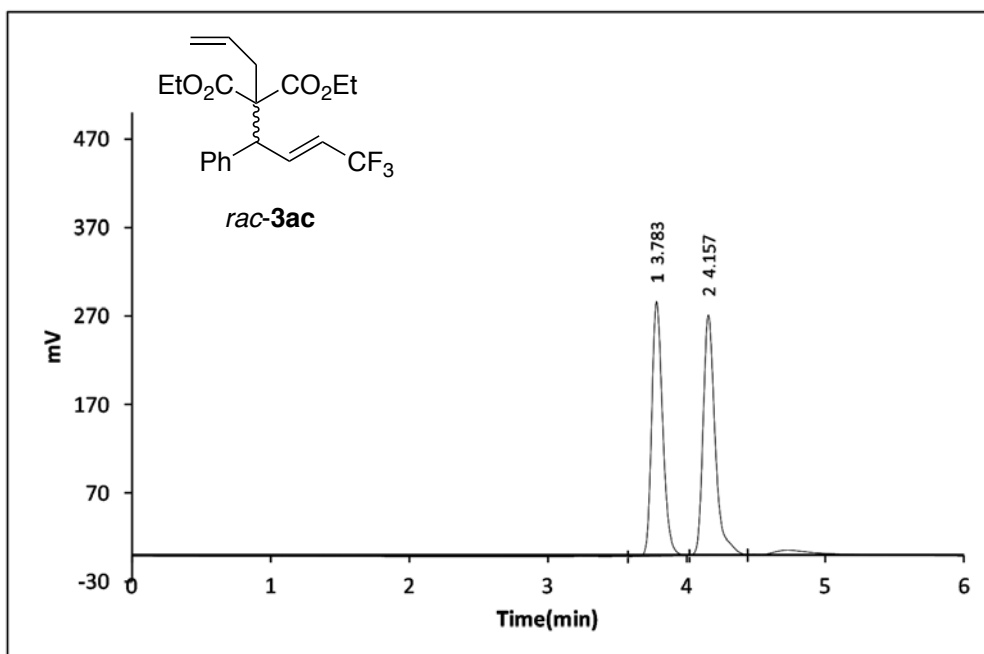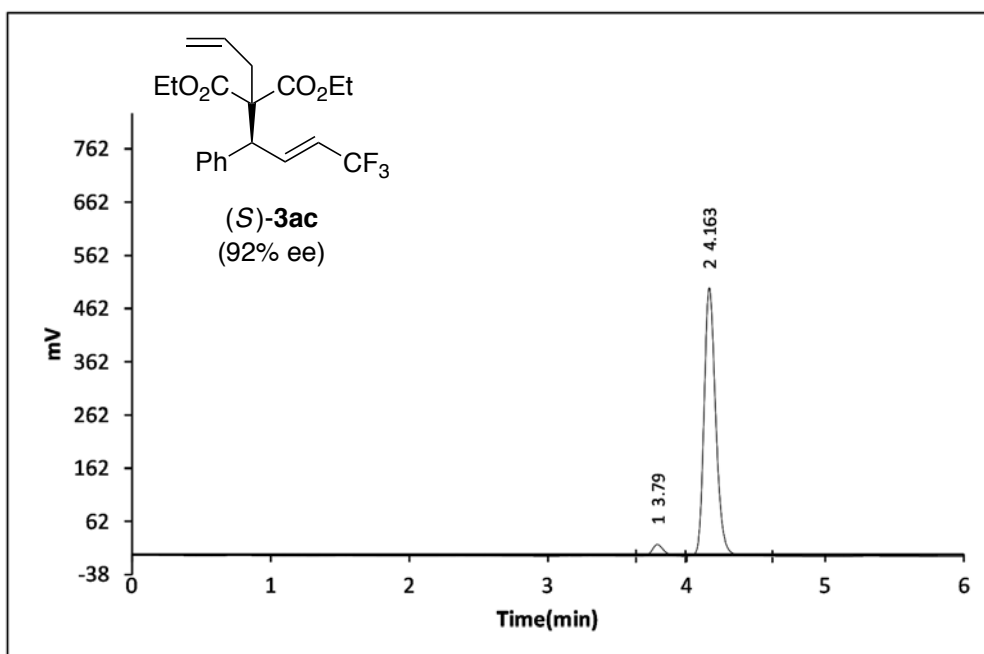



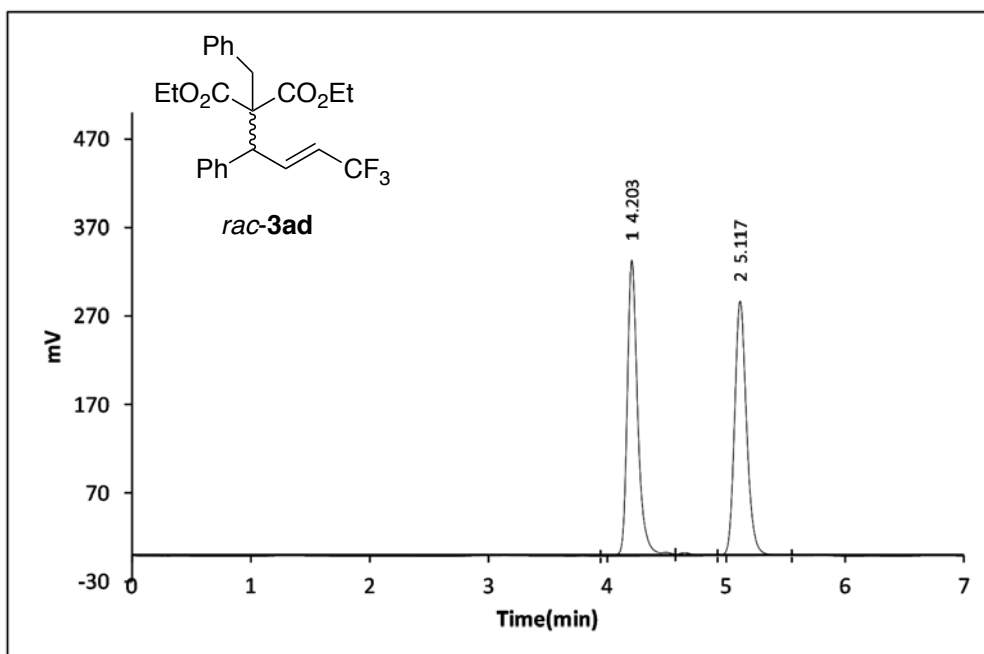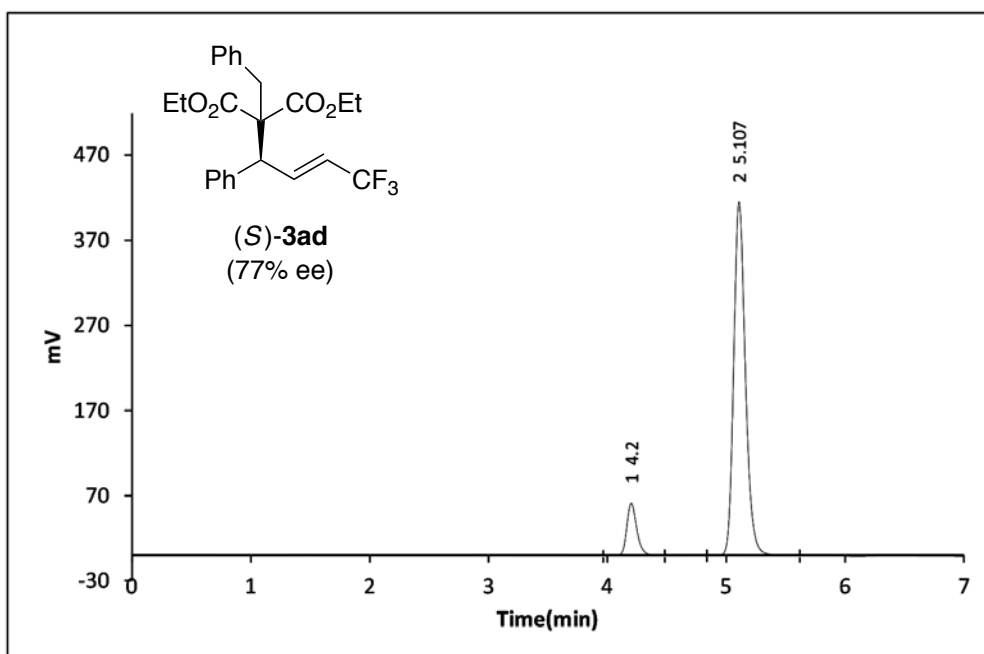

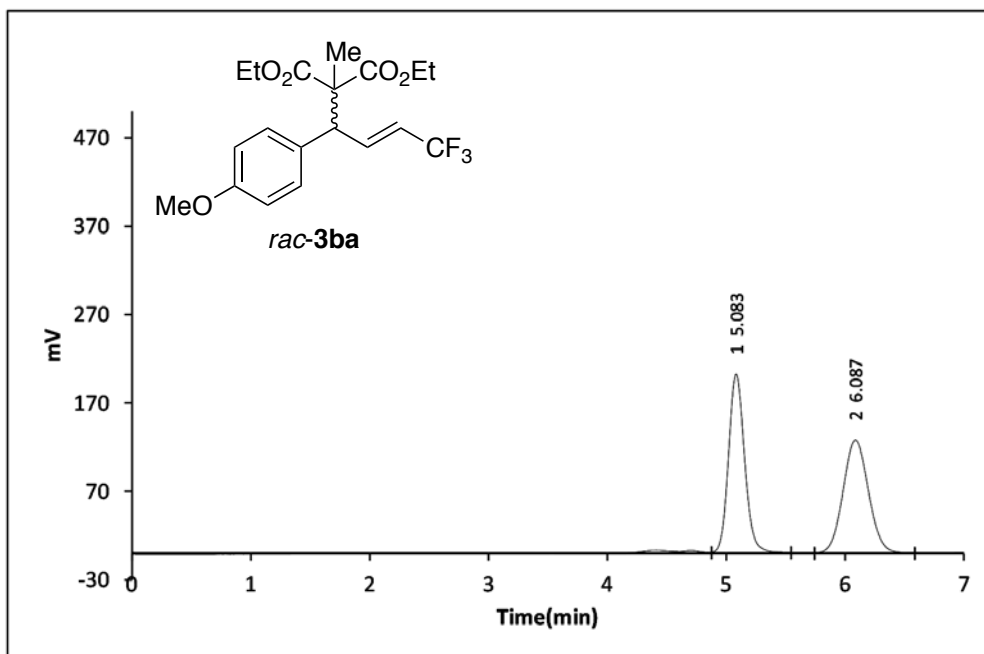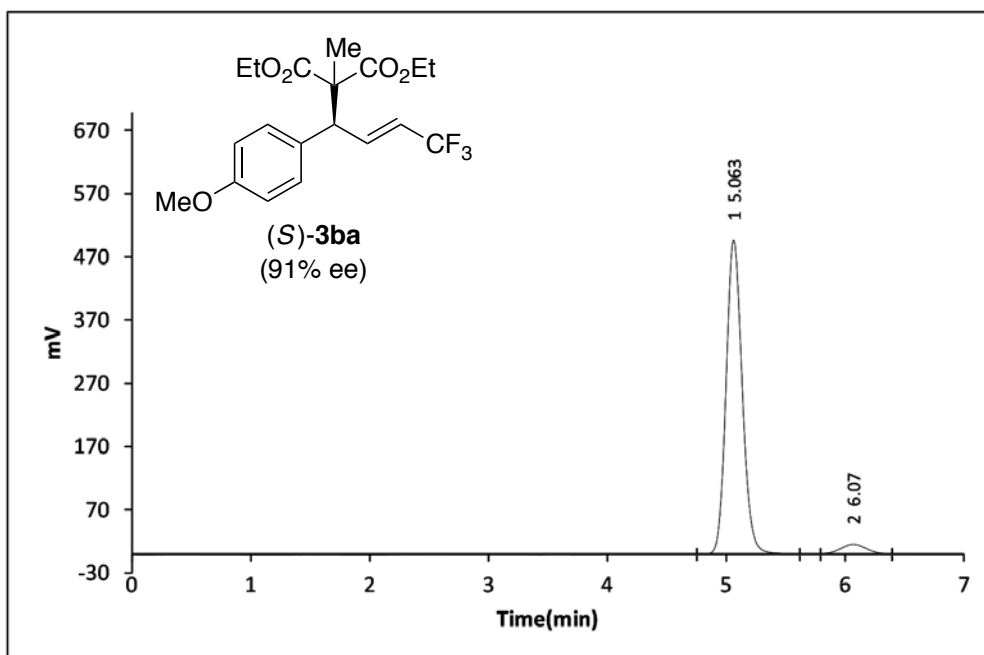

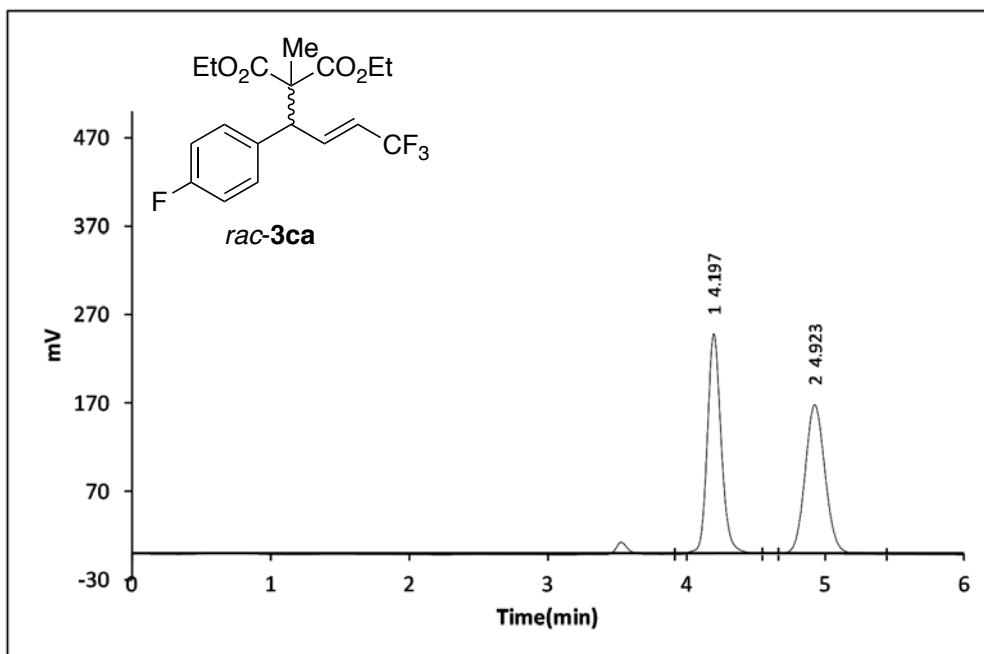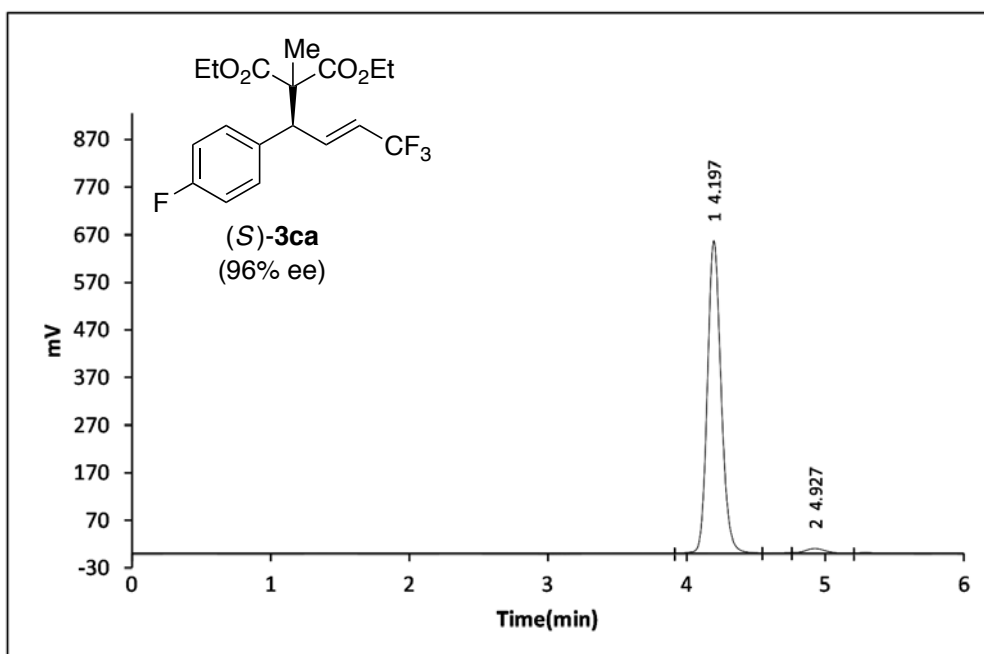

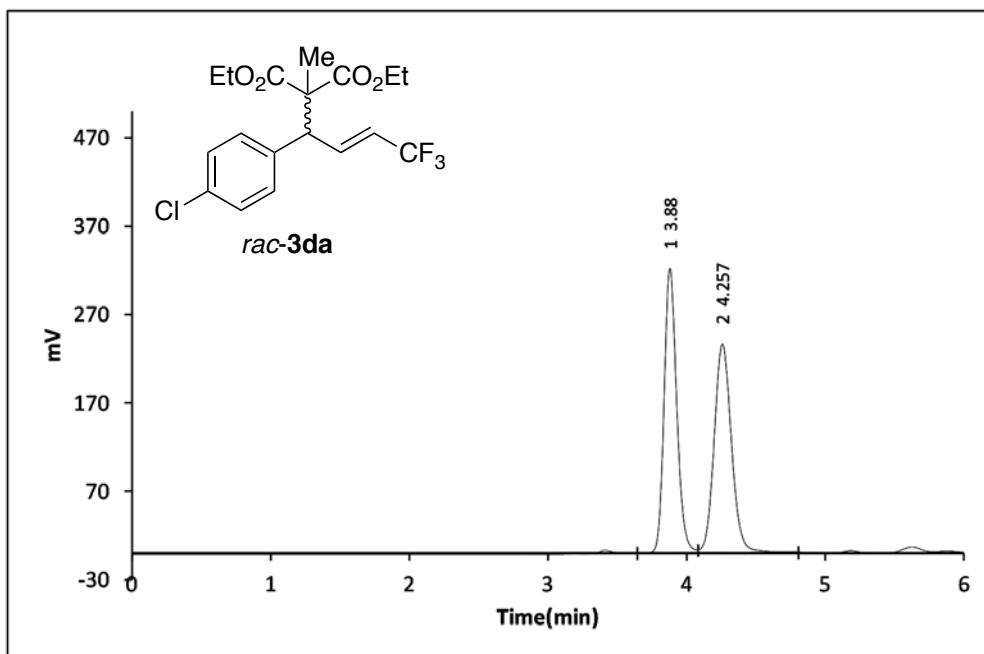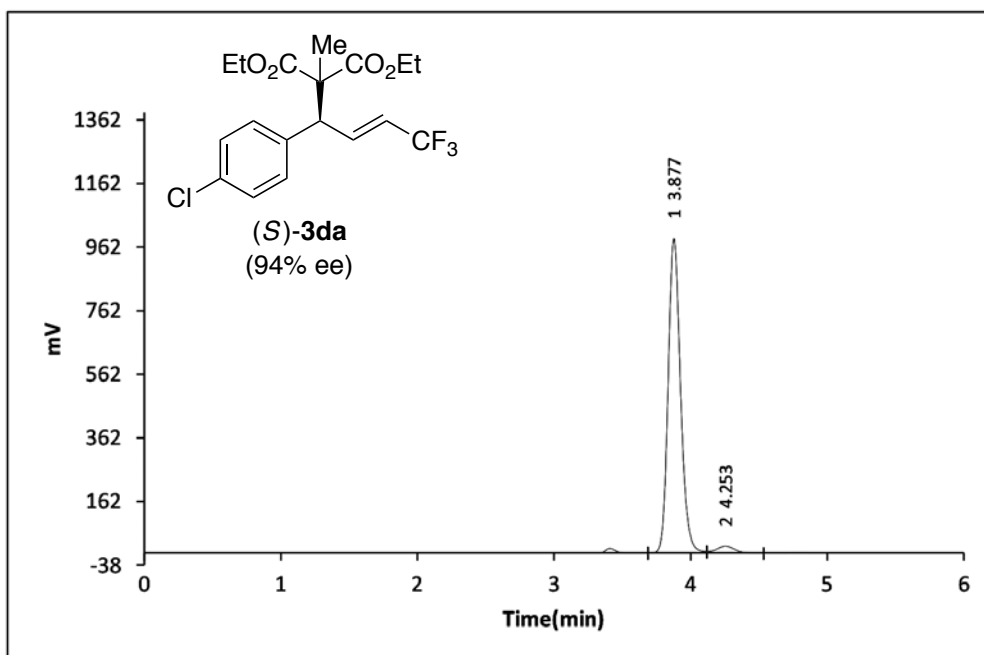

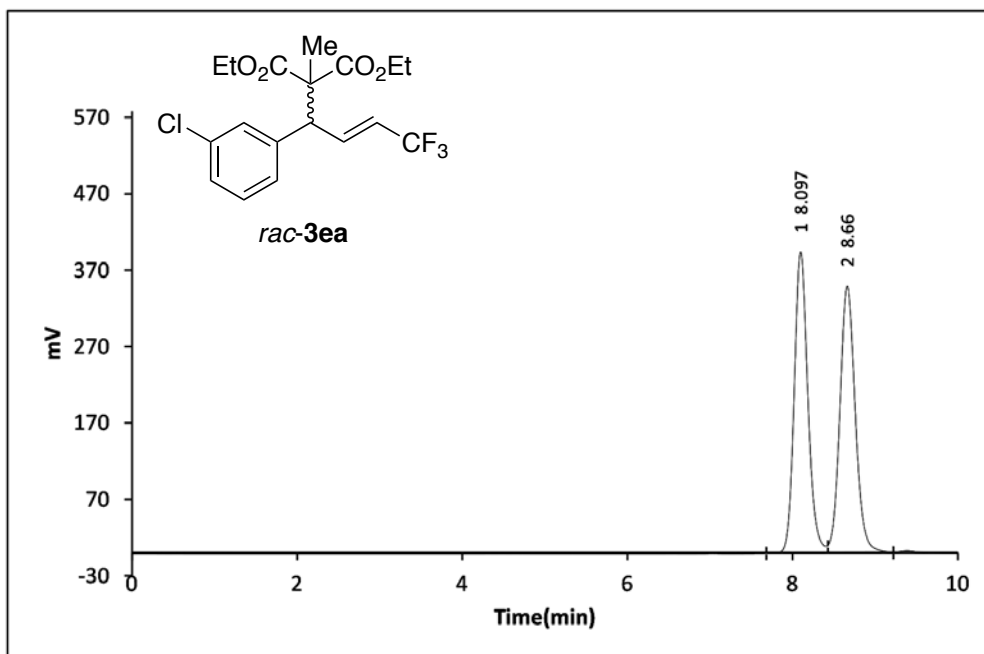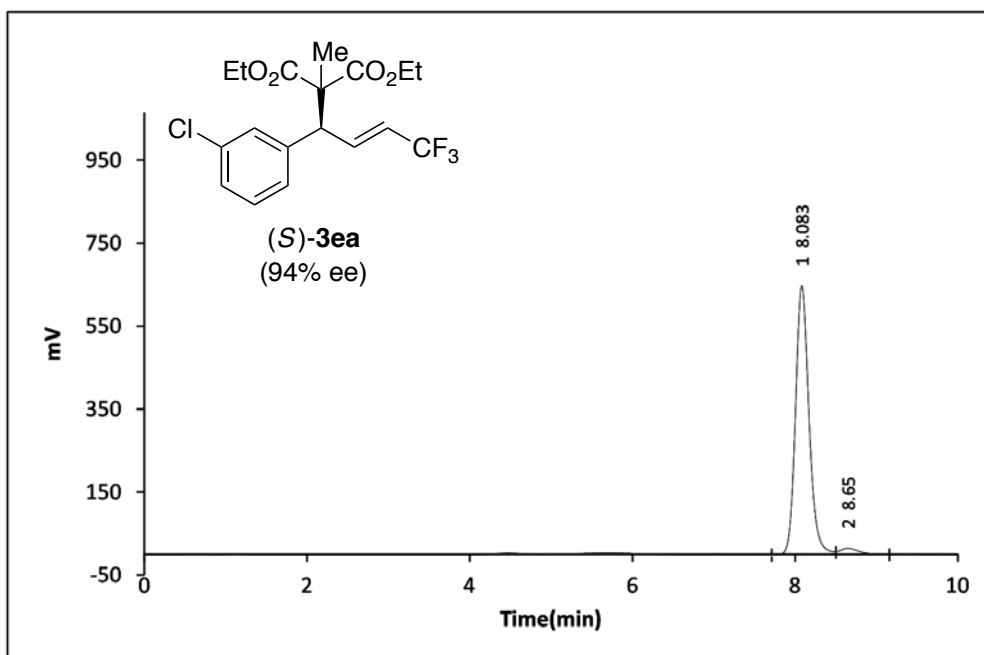

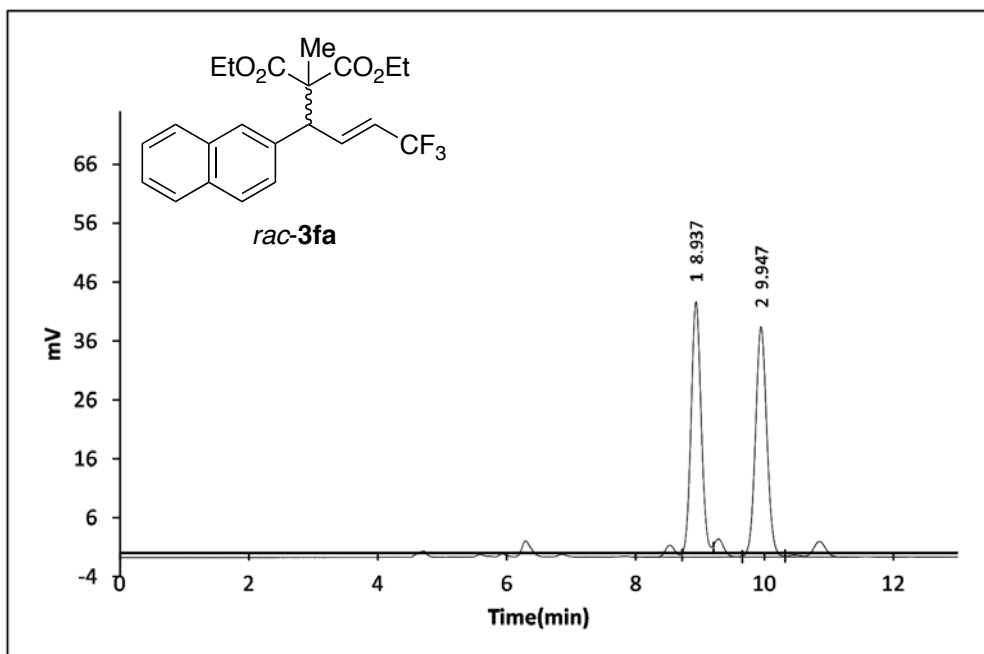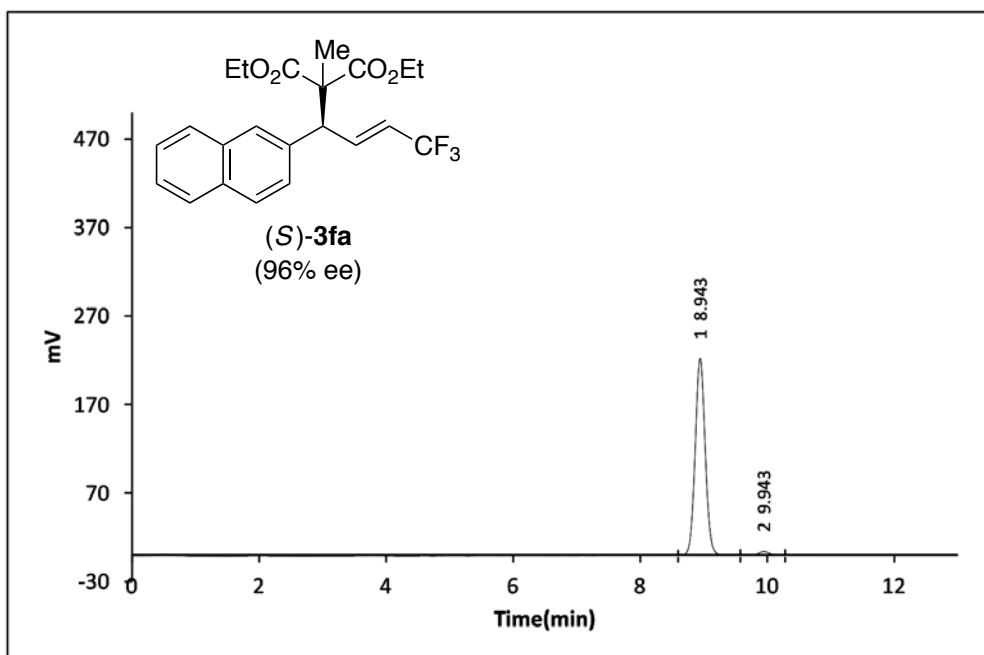

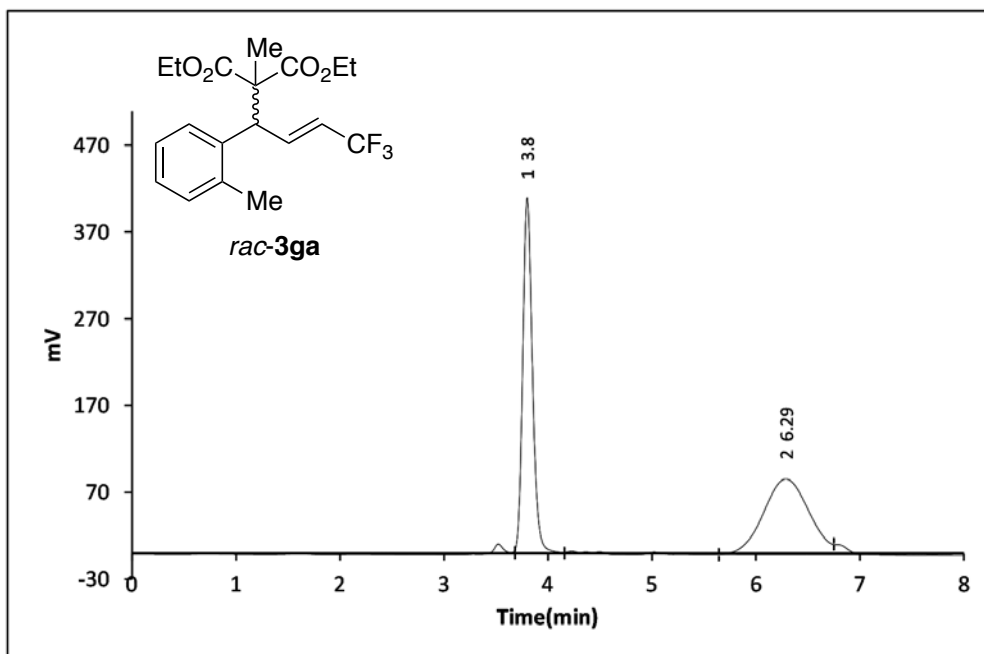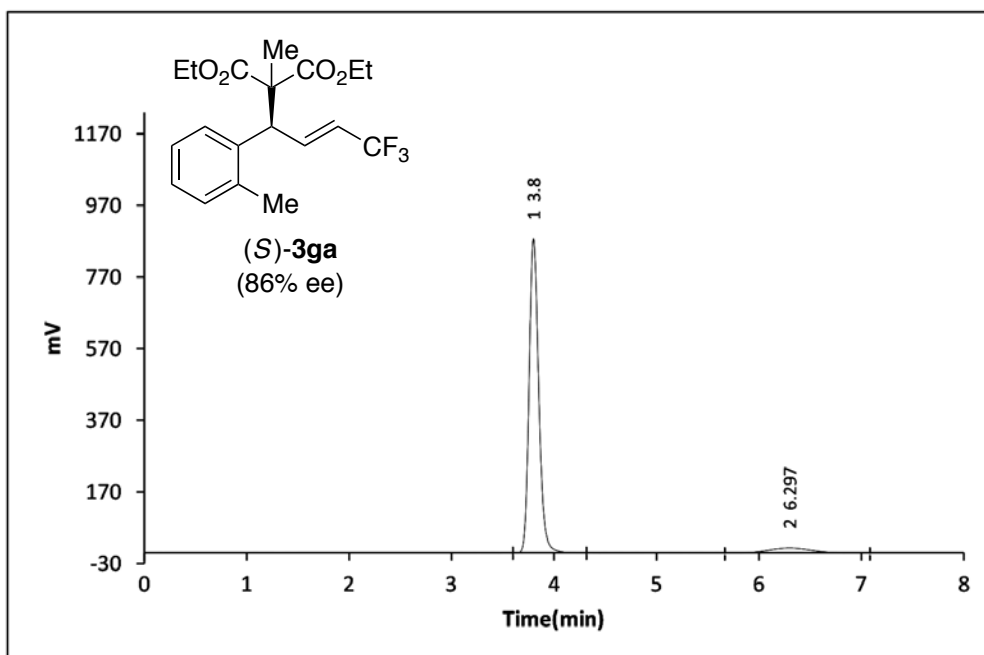

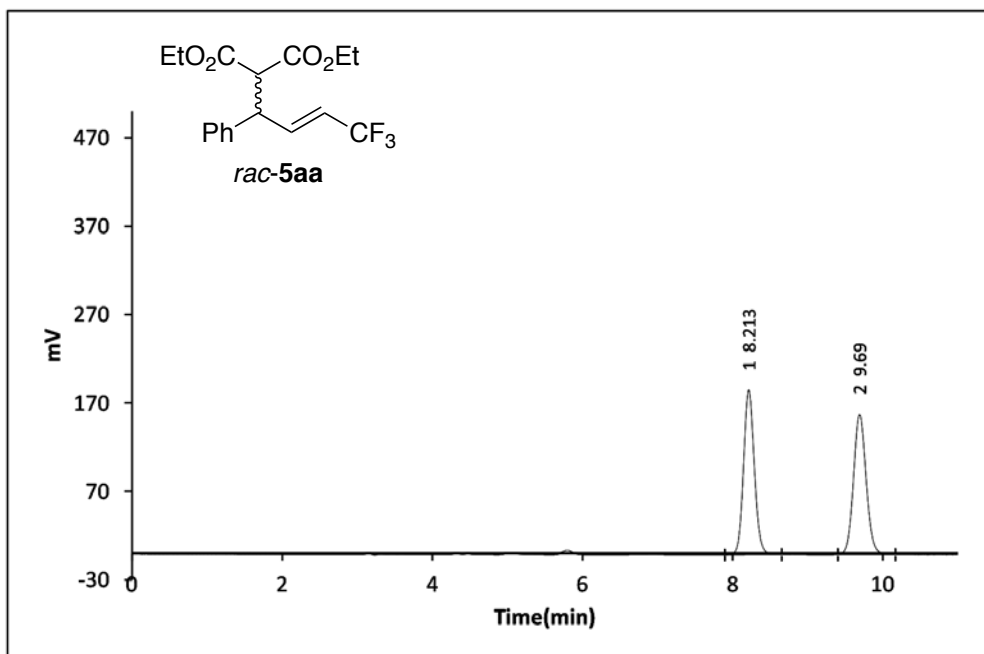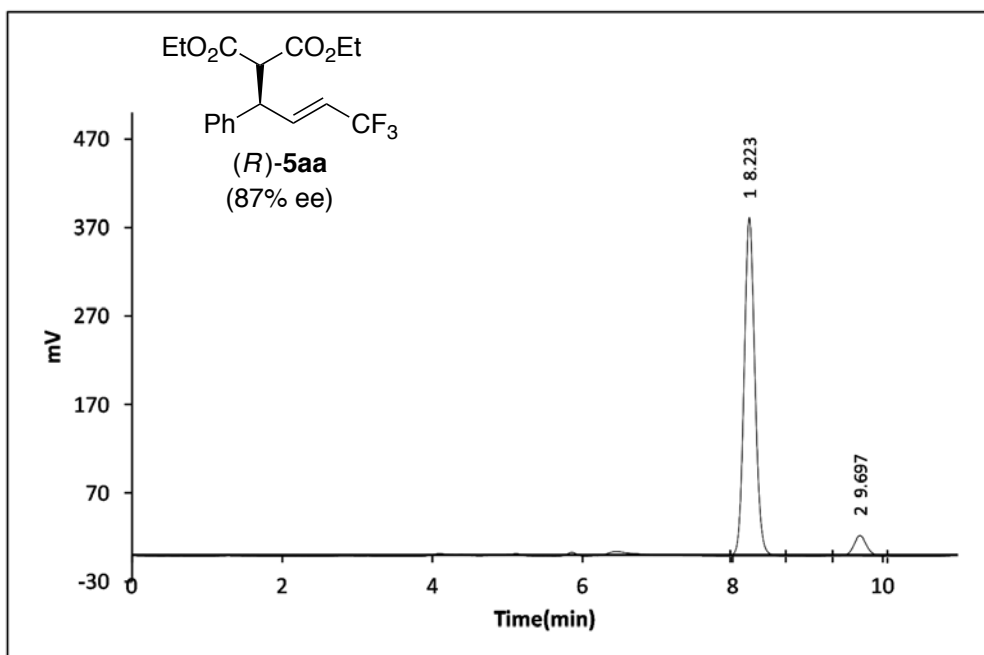



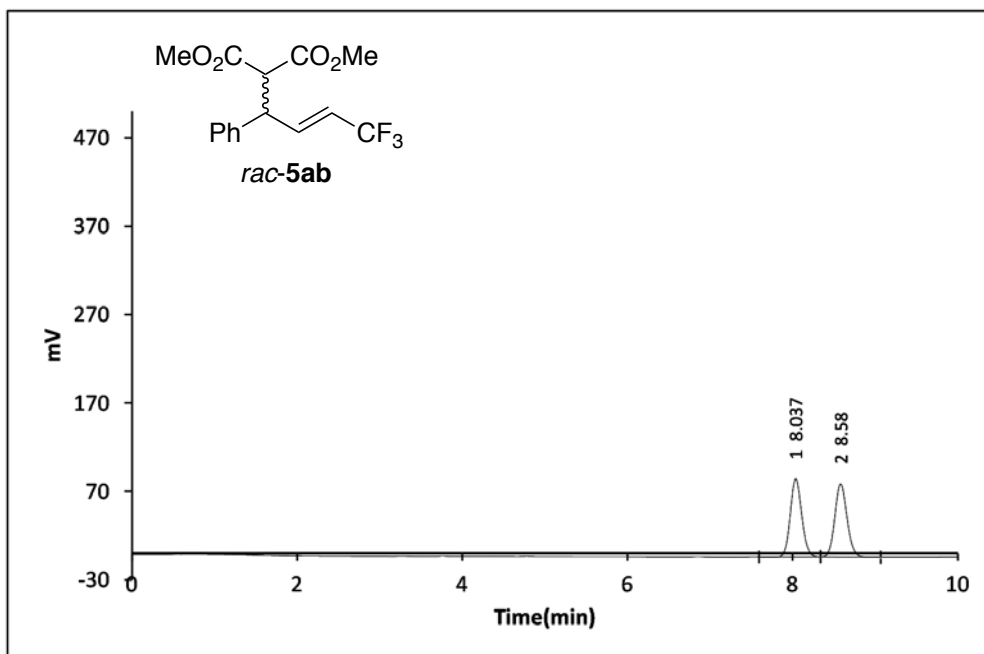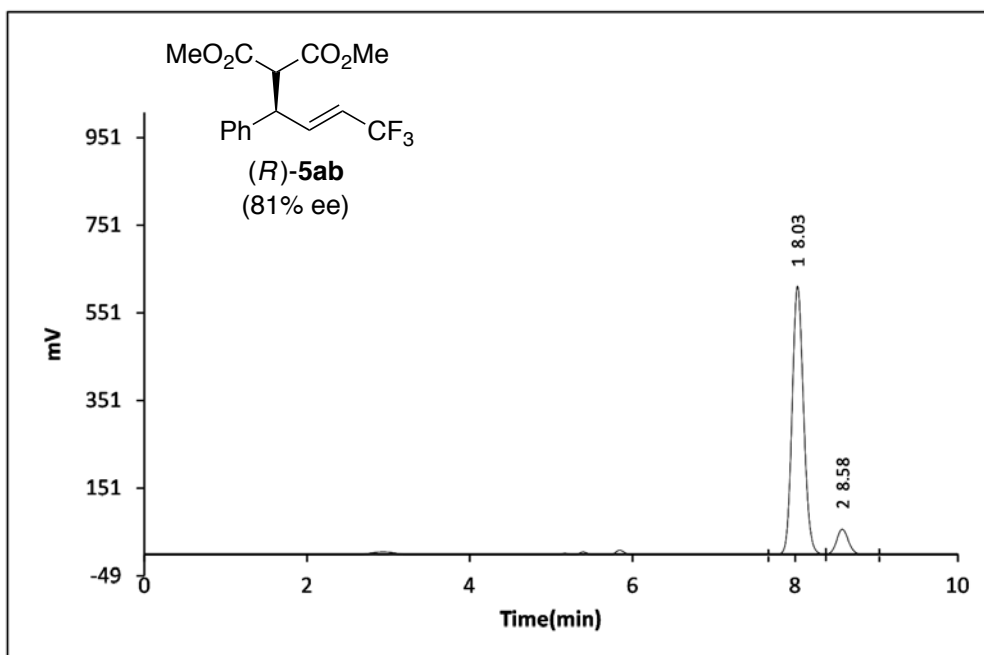

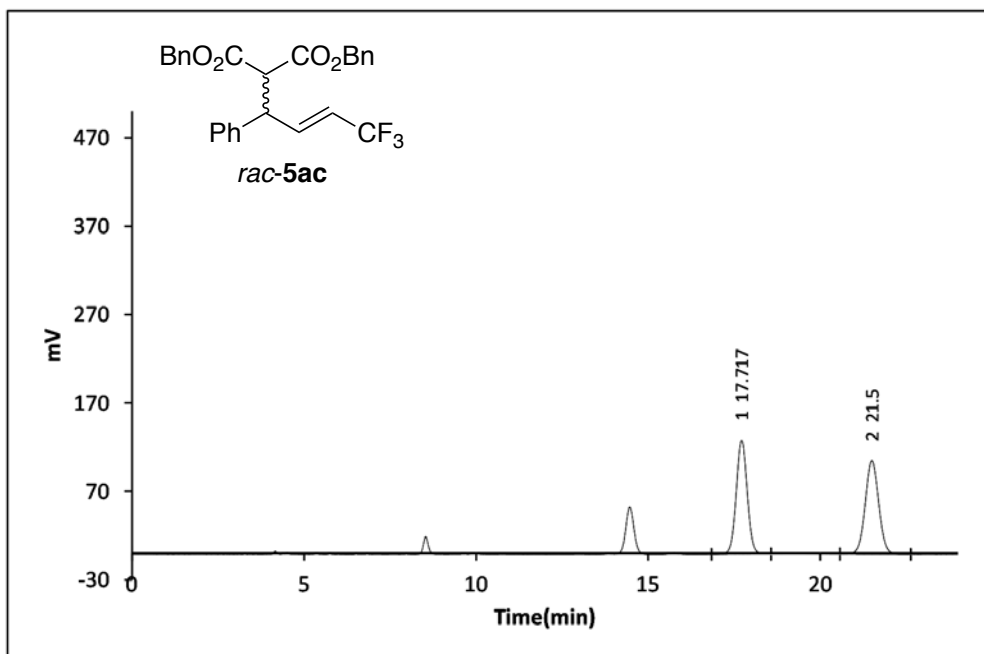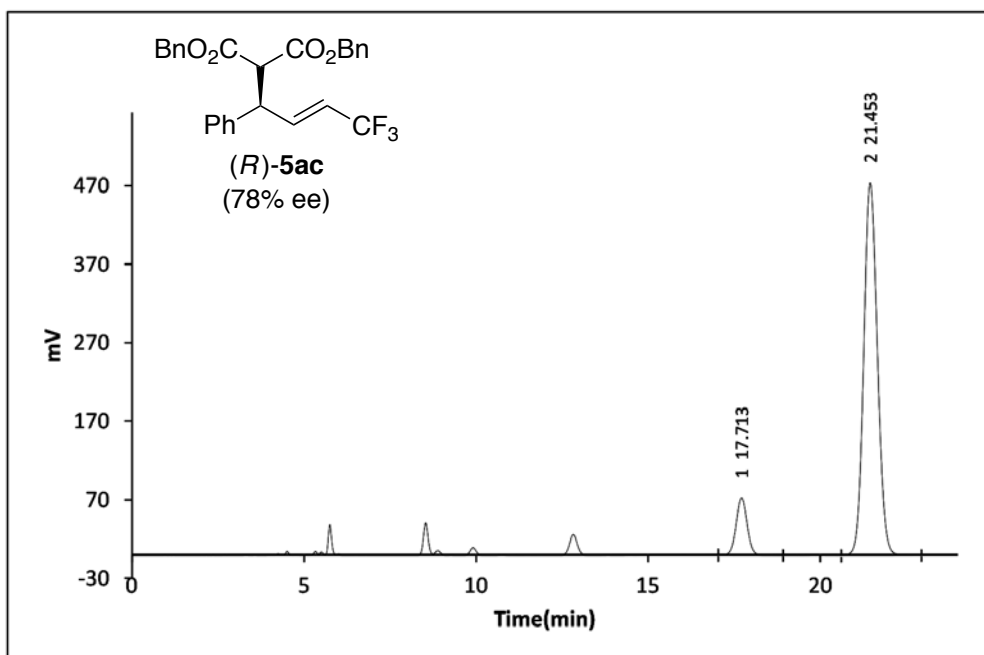

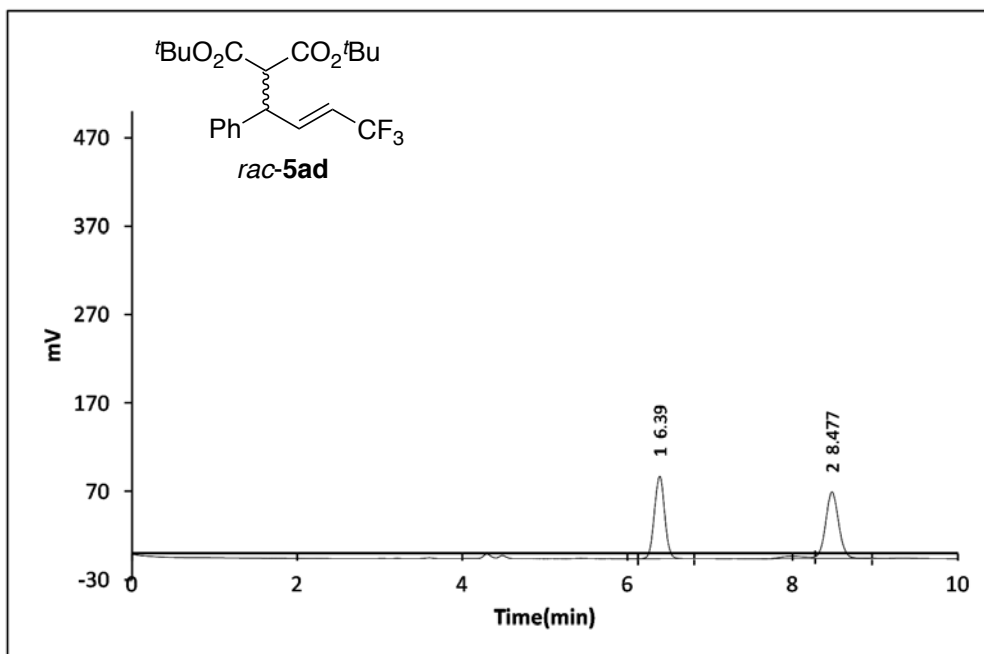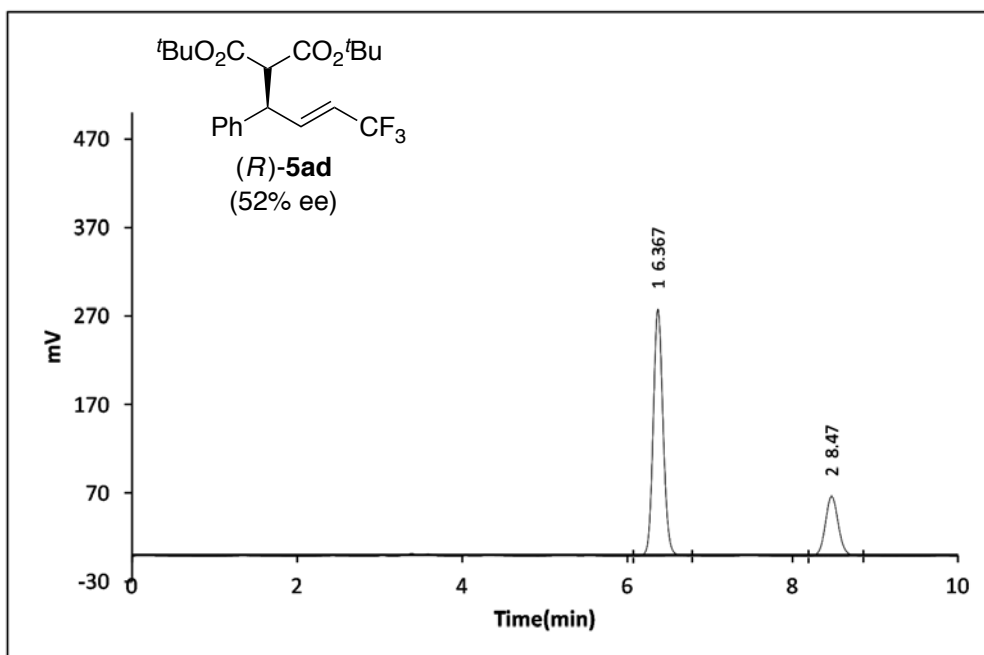

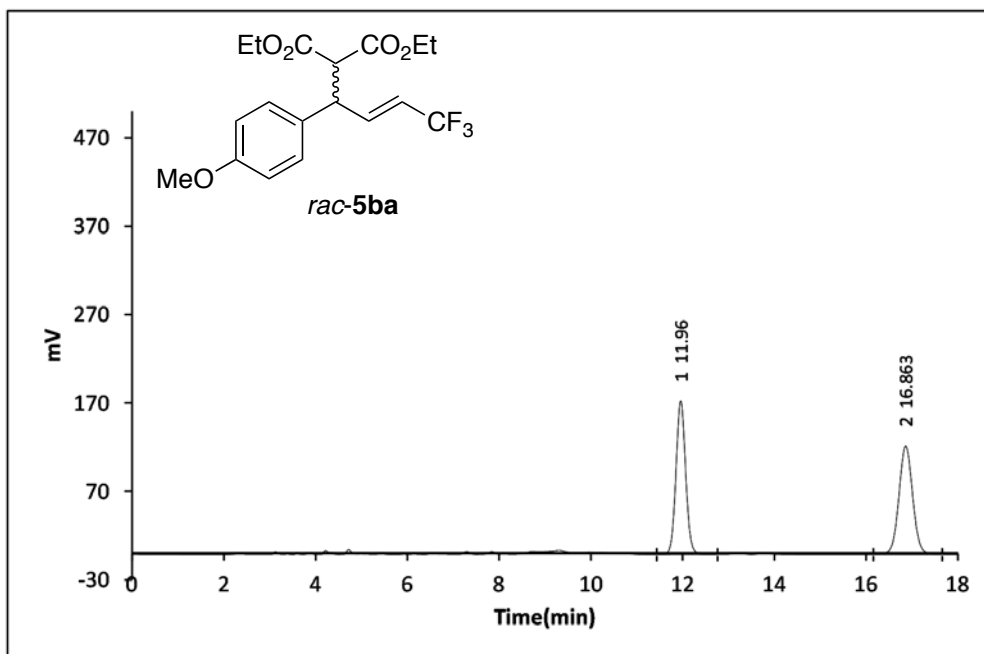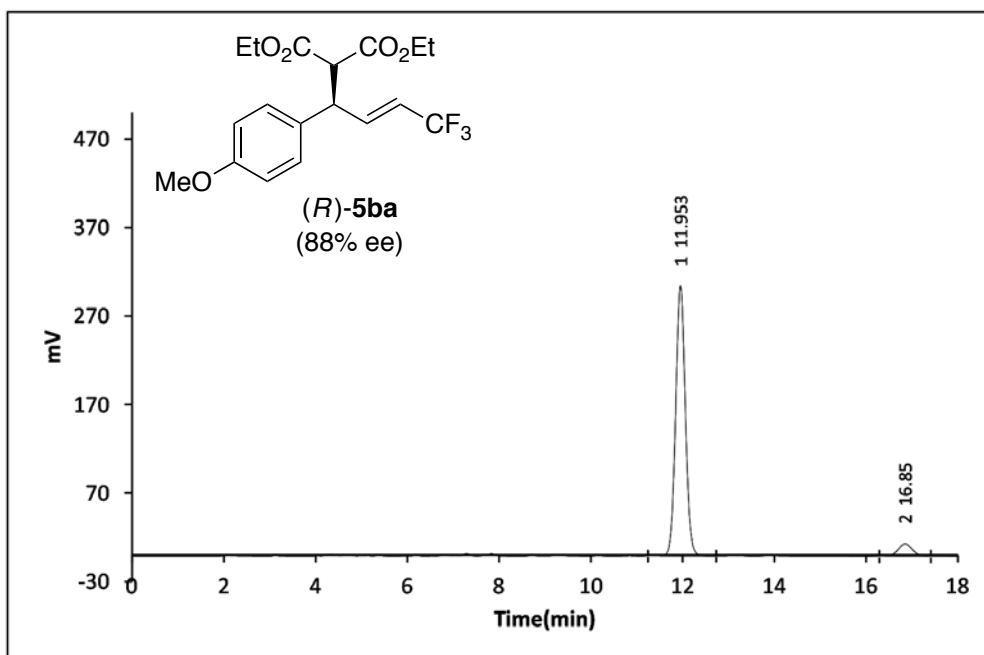

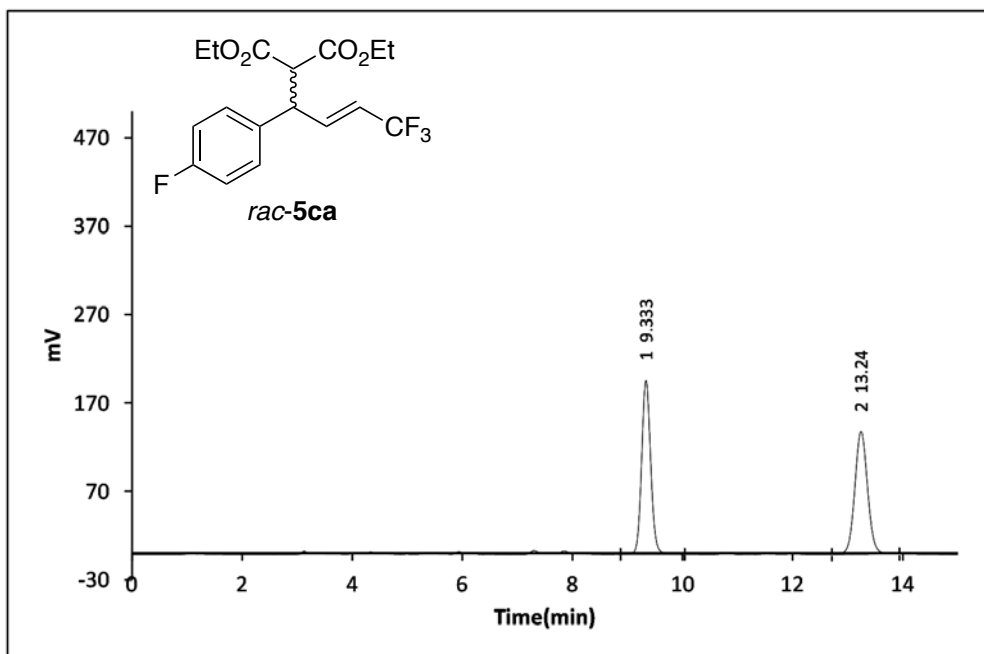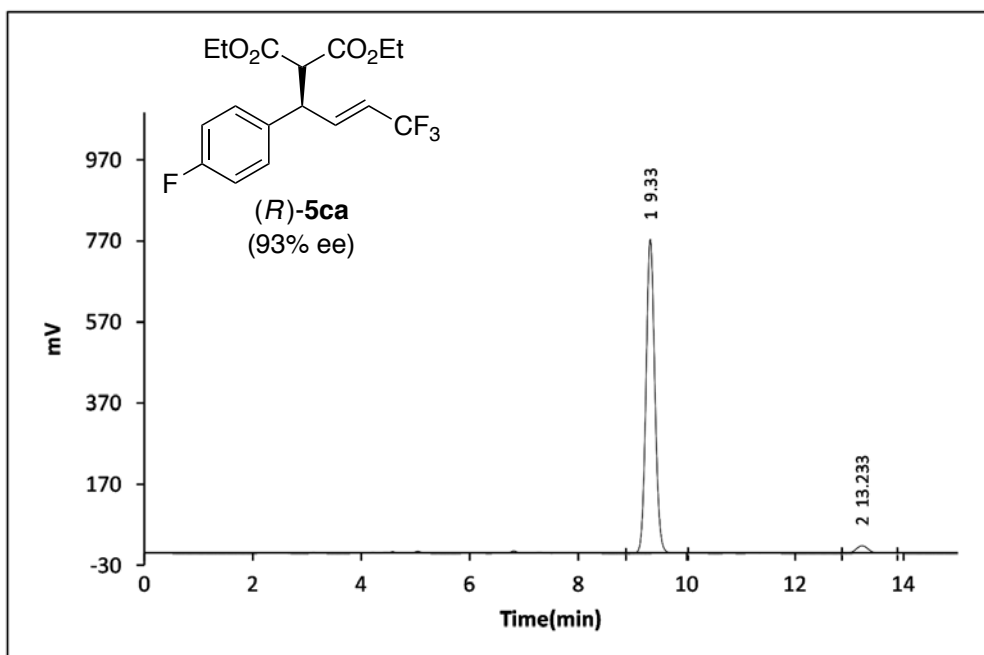

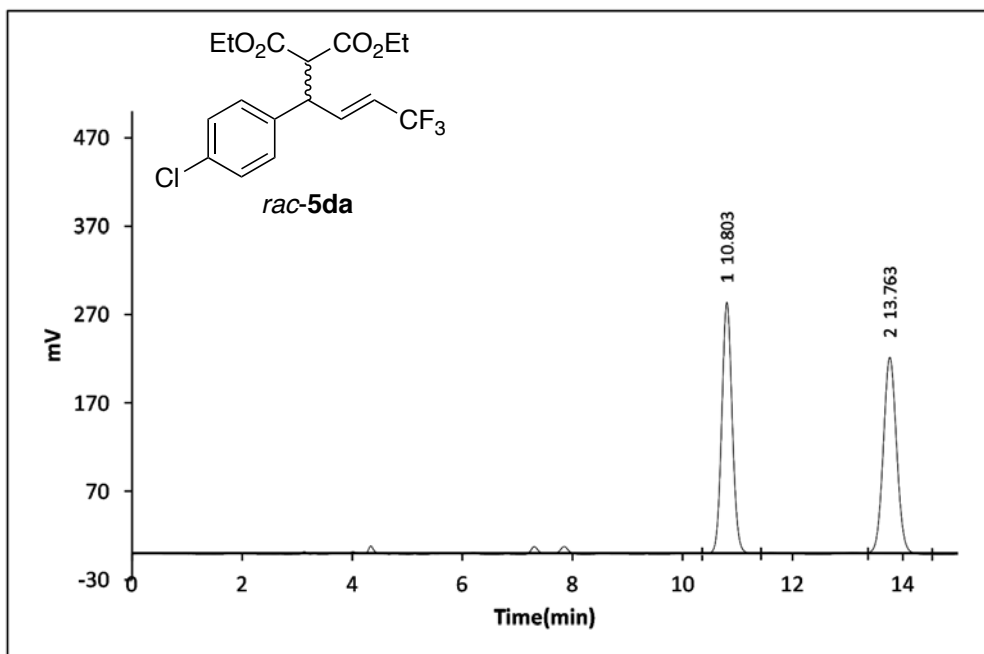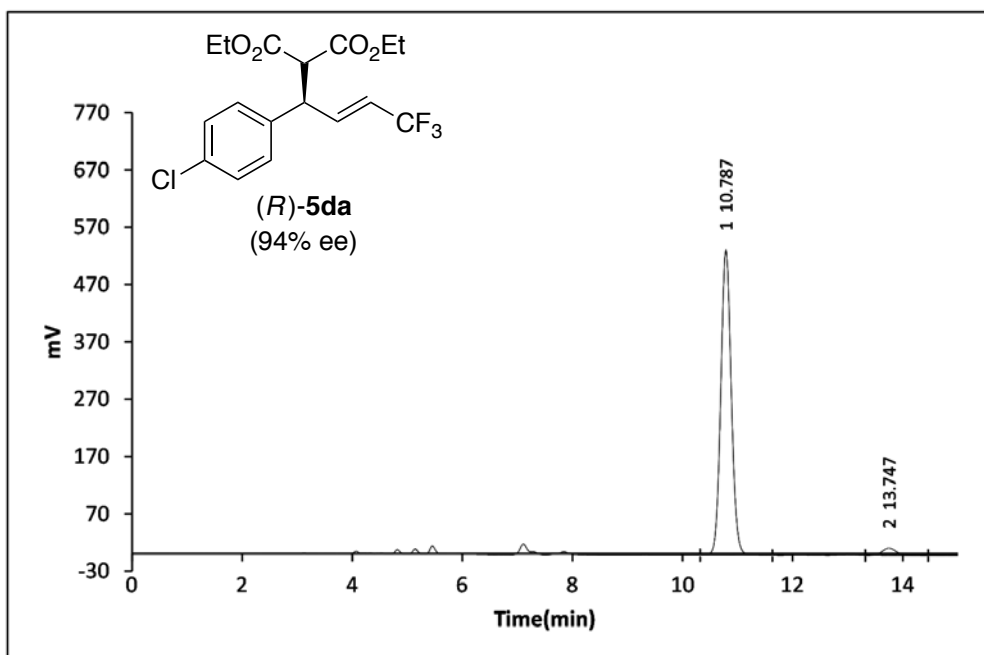

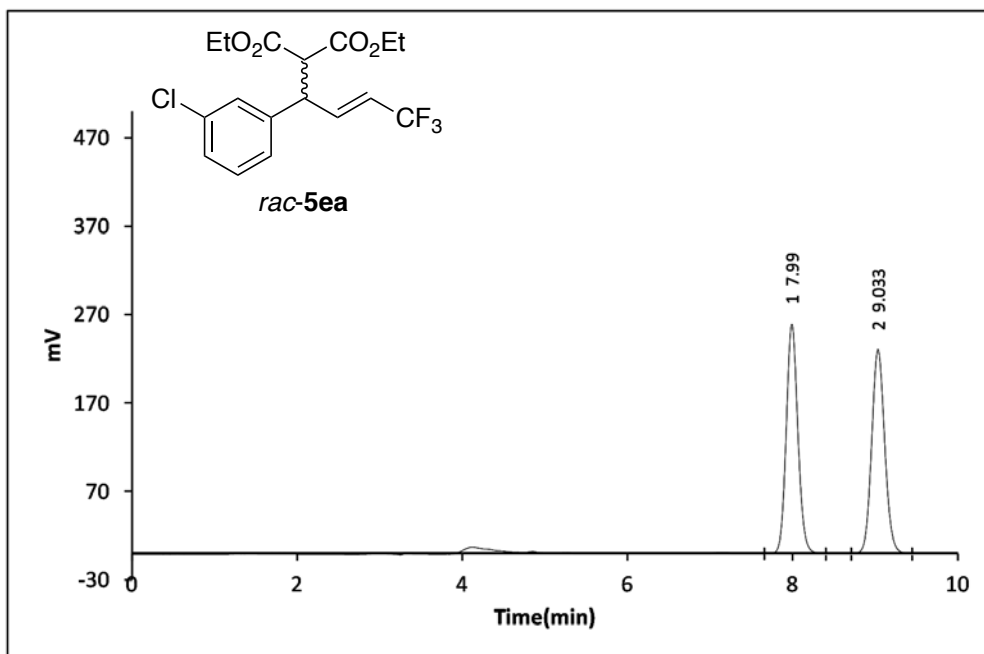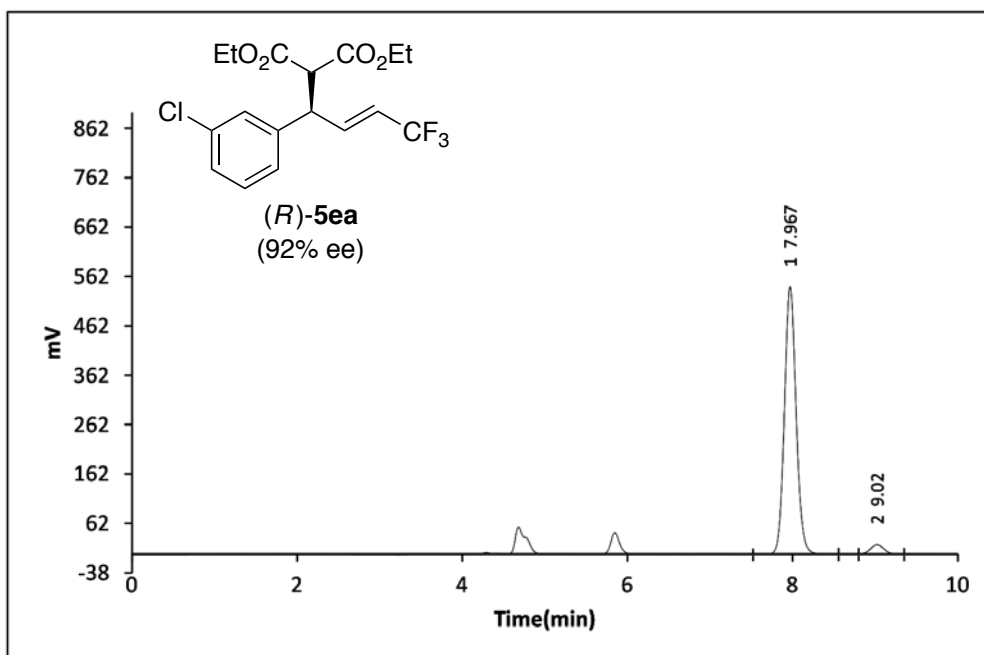

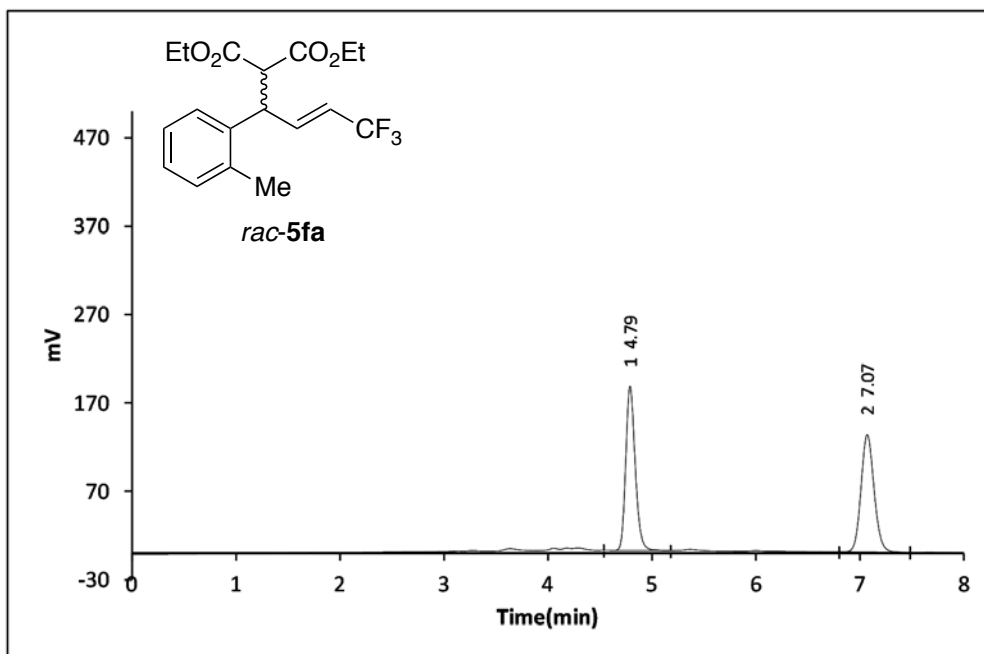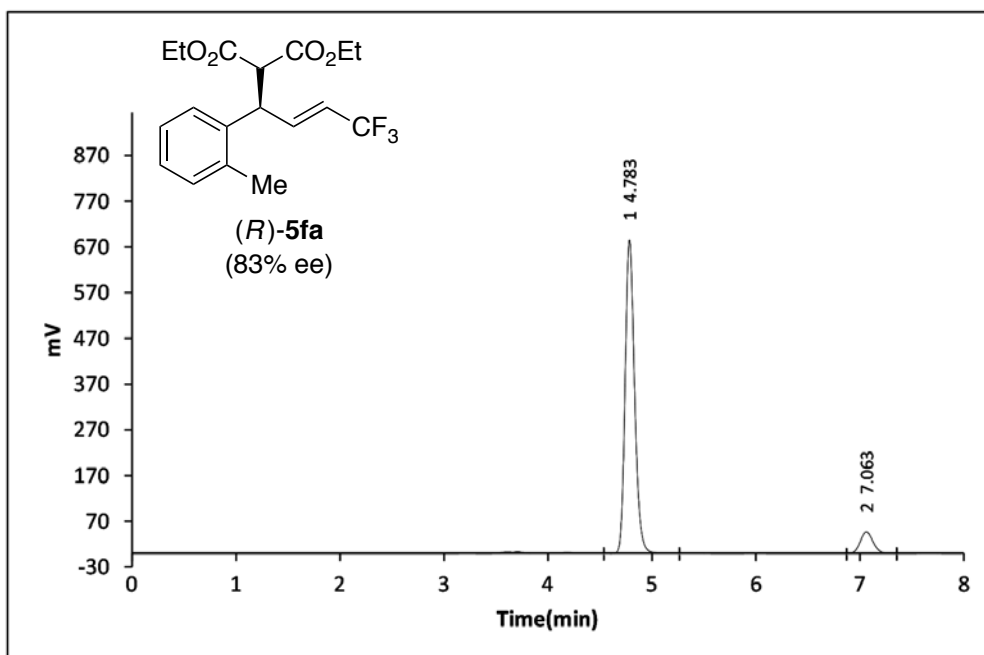



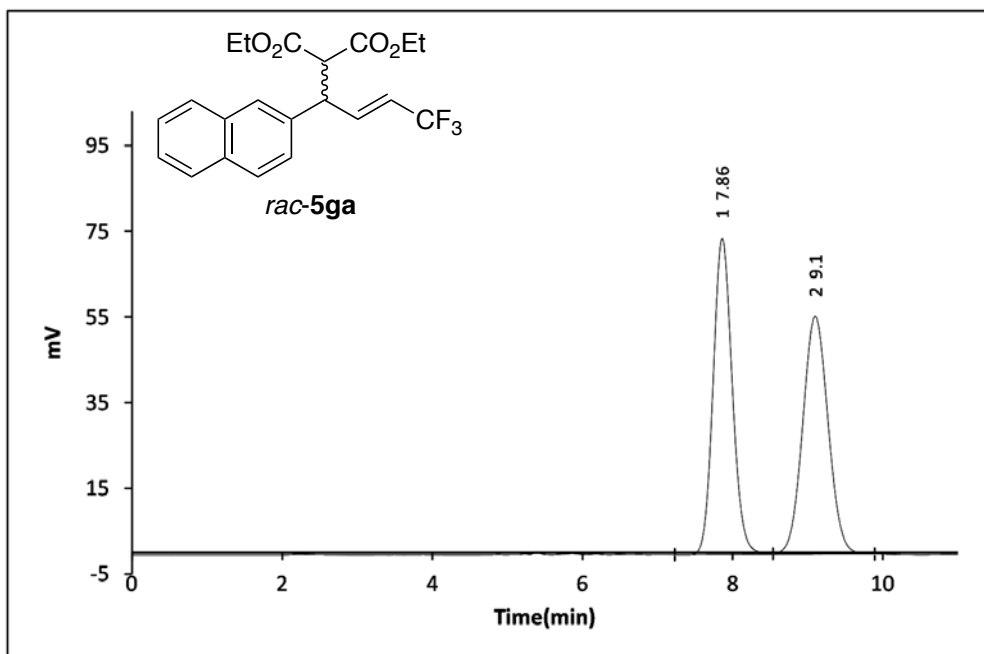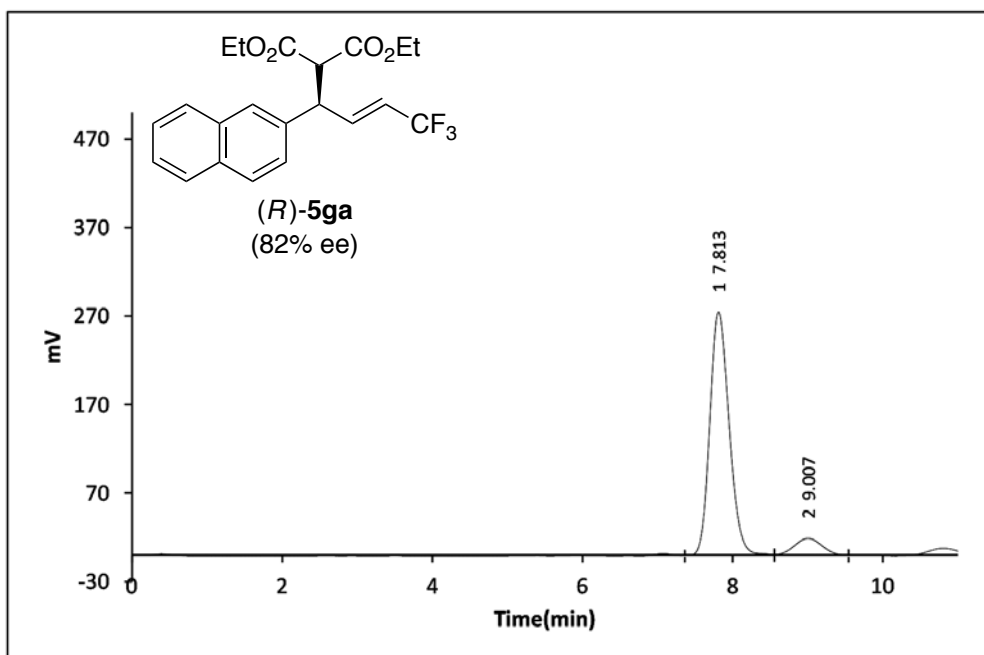

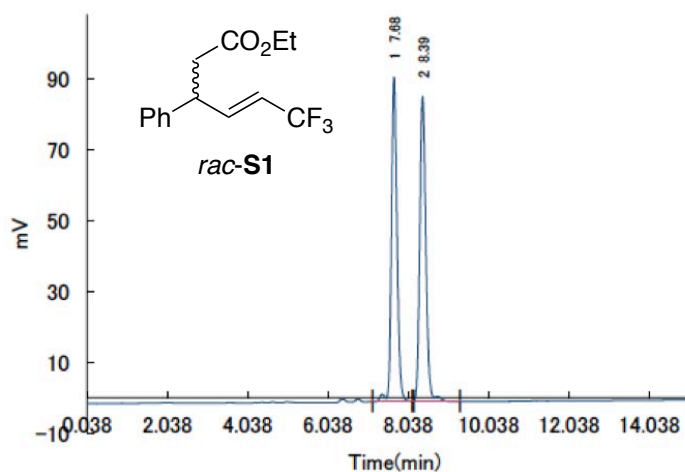

comment AD-H, H/i-PrOH=49/1, 0.7mL/min, 215nm

| No. | Rt   | Peak Name | Area      | Area(%) | Height | Amount | NTP     | Tf    | Resolution |
|-----|------|-----------|-----------|---------|--------|--------|---------|-------|------------|
| 1   | 7.68 |           | 892238.4  | 49.5832 | 91343  | ---    | 14033.6 | 1.169 | 2.628      |
| 2   | 8.39 |           | 907239.8  | 50.4168 | 85895  | ---    | 14283.4 | 1.165 | ---        |
|     |      |           | 1799478.2 | 100     | 177238 |        |         |       |            |

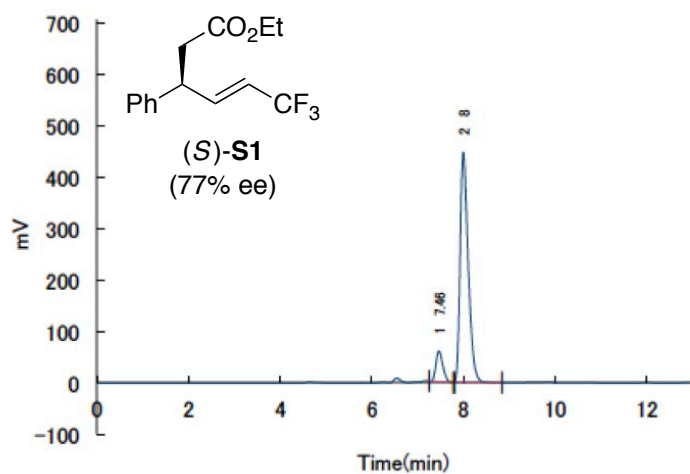

comment AD-H, H/i-PrOH=49/1, 0.7mL/min, 215nm

| No. | Rt   | Peak Name | Area      | Area(%) | Height | Amount | NTP     | Tf    | Resolution |
|-----|------|-----------|-----------|---------|--------|--------|---------|-------|------------|
| 1   | 7.46 |           | 616662.2  | 10.1465 | 58954  | ---    | 11086.1 | 1.269 | 1.726      |
| 2   | 8    |           | 5460906.4 | 89.8535 | 448619 | ---    | 9154.2  | 1.419 | ---        |
|     |      |           | 6077568.6 | 100     | 507573 |        |         |       |            |

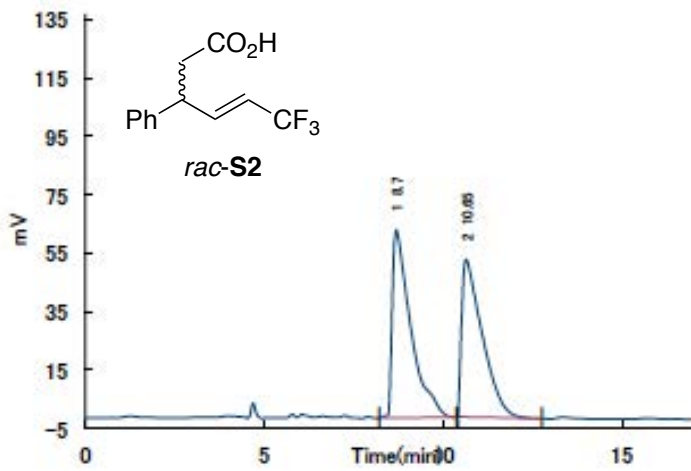

comment AD-H, H/i-PrOH=9/1, 0.7mL/min, 215nm

| No. | Rt    | Peak Name | Area      | Area(%) | Height | Amount | NTP    | Tf    | Resolution |
|-----|-------|-----------|-----------|---------|--------|--------|--------|-------|------------|
| 1   | 8.7   |           | 2314161.4 | 51.7283 | 64309  | —      | 977.9  | 3.423 | 1.747      |
| 2   | 10.65 |           | 2159520   | 48.2717 | 53929  | —      | 1436.6 | 3.004 | —          |
|     |       |           | 4473681.4 | 100     | 118238 |        |        |       |            |

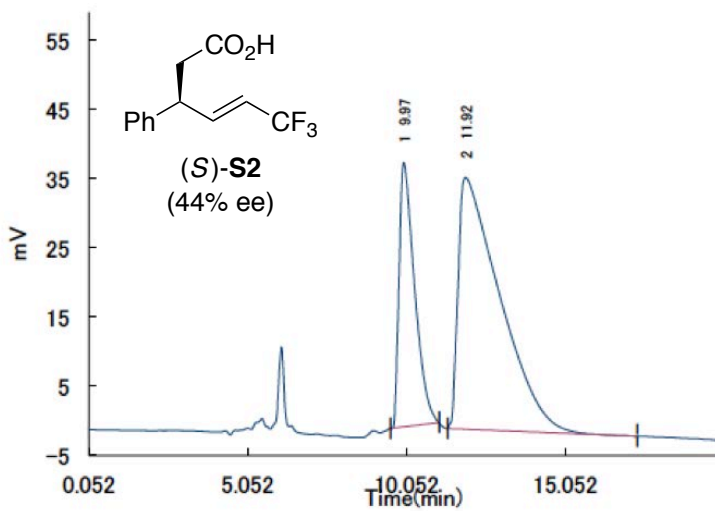

comment AD-H, H/i-PrOH=9/1, 0.7mL/min, 215nm

| No. | Rt    | Peak Name | Area      | Area(%) | Height | Amount | NTP    | Tf    | Resolution |
|-----|-------|-----------|-----------|---------|--------|--------|--------|-------|------------|
| 1   | 9.97  |           | 1294366.3 | 28.0177 | 38174  | —      | 1775.4 | 2.02  | 1.107      |
| 2   | 11.92 |           | 3325453.6 | 71.9823 | 36358  | —      | 345.9  | 3.687 | —          |
|     |       |           | 4619819.9 | 100     | 74532  |        |        |       |            |

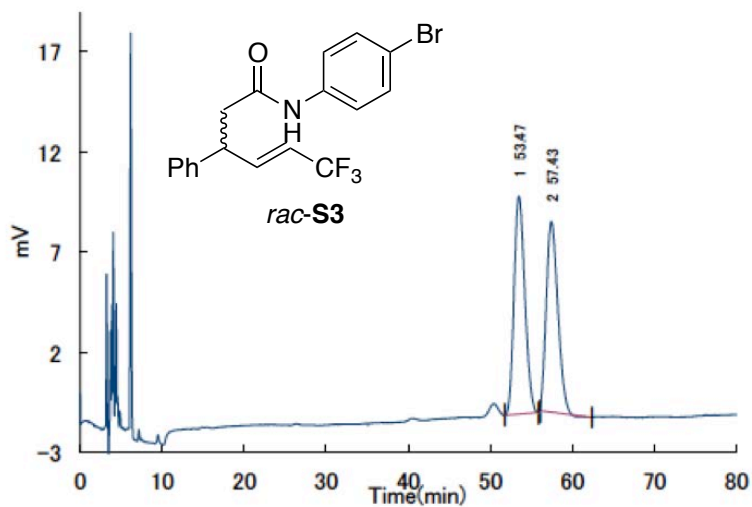

comment AD-H, H/i-PrOH=19/1, 1.0mL/min, 215nm

| No. | Rt    | Peak Name | Area      | Area(%) | Height | Amount | NTP    | Tf    | Resolution |
|-----|-------|-----------|-----------|---------|--------|--------|--------|-------|------------|
| 1   | 53.47 |           | 991779.8  | 51.5716 | 10880  | —      | 7576.4 | 1.193 | 1.552      |
| 2   | 57.43 |           | 931331.6  | 48.4284 | 9528   | —      | 7537.8 | 1.248 | —          |
|     |       |           | 1923111.4 | 100     | 20408  |        |        |       |            |

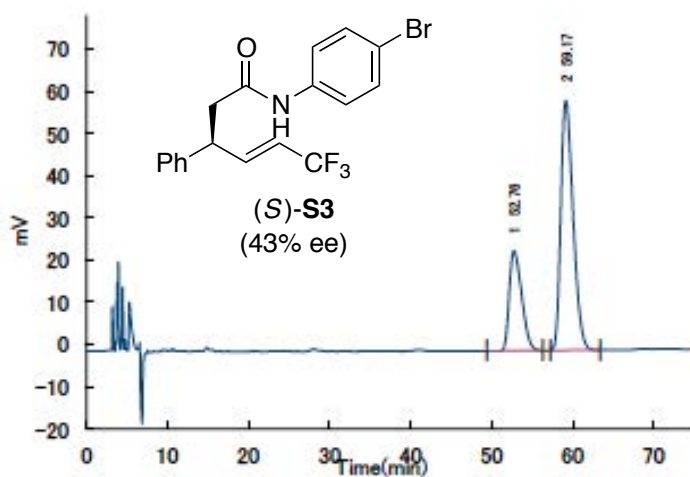

comment AD-H, H/i-PrOH=19/1, 1.0mL/min, 215nm

| No. | Rt    | Peak Name | Area      | Area(%) | Height | Amount | NTP    | Tf    | Resolution |
|-----|-------|-----------|-----------|---------|--------|--------|--------|-------|------------|
| 1   | 52.76 |           | 2501024.2 | 28.6156 | 23616  | —      | 5700   | 1.443 | 2.277      |
| 2   | 59.17 |           | 6239036.9 | 71.3844 | 59188  | —      | 6989.9 | 1.364 | —          |
|     |       |           | 8740061.1 | 100     | 82804  |        |        |       |            |

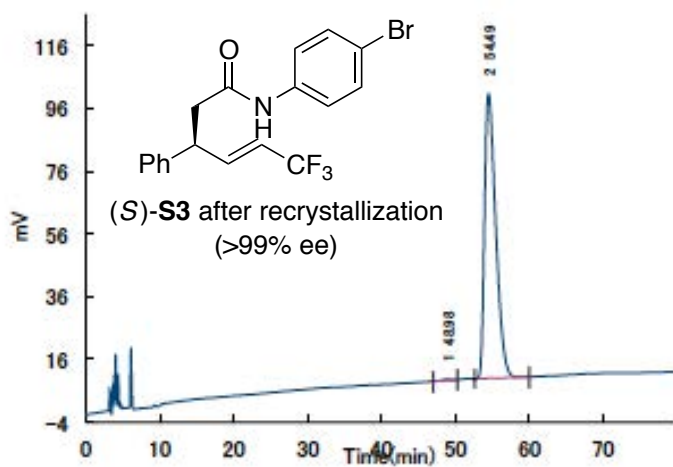

comment AD-H, H/i-PrOH=19/1, 1.0mL/min, 215nm

| No. | Rt    | Peak Name | Area      | Area(%) | Height | Amount | NTP    | Tf    | Resolution |
|-----|-------|-----------|-----------|---------|--------|--------|--------|-------|------------|
| 1   | 48.98 |           | 27670.2   | 0.2892  | 331    | —      | 8709.7 | 0.824 | 2.23       |
| 2   | 54.49 |           | 9540997.5 | 99.7108 | 90655  | —      | 5884.8 | 1.611 | —          |
|     |       |           | 9568667.7 | 100     | 90986  |        |        |       |            |
